# Supplementary material for: Clinical outcomes and resource utilisation in Medicare patients with chronic liver disease: a historical cohort study
Source: PubMed Central journal article supplement — BMJ Open. 2014 May 16;4(5):e004318. doi: 10.1136/bmjopen-2013-004318 (PMC4025451; doi:10.1136/bmjopen-2013-004318), 2014-05-16
Supplement: bmjopen-2013-004318.draft_revisions.pdf [file bmjopen-2013-004318.draft_revisions.pdf]

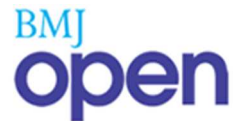

## Clinical Outcomes and Resource Utilization in Chronic Liver Disease – a Temporal Trends Study of Medicare Population

|                                 |                                                                                                                                                                                                                                                                                                                                                                                               |
|---------------------------------|-----------------------------------------------------------------------------------------------------------------------------------------------------------------------------------------------------------------------------------------------------------------------------------------------------------------------------------------------------------------------------------------------|
| Journal:                        | <i>BMJ Open</i>                                                                                                                                                                                                                                                                                                                                                                               |
| Manuscript ID:                  | bmjopen-2013-004318                                                                                                                                                                                                                                                                                                                                                                           |
| Article Type:                   | Research                                                                                                                                                                                                                                                                                                                                                                                      |
| Date Submitted by the Author:   | 23-Oct-2013                                                                                                                                                                                                                                                                                                                                                                                   |
| Complete List of Authors:       | Younossi, Zobair; Inova Fairfax Hospital, Medicine and Beatty Center for Integrated Research<br>Zheng, Li; Inova Health Systems, Betty and Guy Beatty Center for Integrated Research<br>Stepanova, Maria; Inova Health Systems, Betty and Guy Beatty Center for Integrated Research<br>Venkatesan, Chapy; Inova Fairfax Hospital, Medicine<br>Mishra, Alita; Inova Fairfax Hospital, Medicine |
| <b>Primary Subject Heading</b>: | Health services research                                                                                                                                                                                                                                                                                                                                                                      |
| Secondary Subject Heading:      | Gastroenterology and hepatology                                                                                                                                                                                                                                                                                                                                                               |
| Keywords:                       | Hepatobiliary disease < GASTROENTEROLOGY, Hepatology < INTERNAL MEDICINE, QUALITATIVE RESEARCH                                                                                                                                                                                                                                                                                                |
|                                 |                                                                                                                                                                                                                                                                                                                                                                                               |

SCHOLARONE™  
Manuscripts

1  
2  
3 **Clinical Outcomes and Resource Utilization in Chronic Liver Disease – a Temporal Trends**  
4  
5  
6 **Study of Medicare Population**  
7  
8  
9

10 Zobair M. Younossi<sup>1,2</sup>, Li Zheng<sup>2</sup>, Maria Stepanova<sup>2</sup>, Chapy Venkatesan<sup>1</sup>, Alita Mishra<sup>1</sup>,

11  
12 1. Department of Medicine, Inova Fairfax Hospital, Falls Church, VA, USA.

13  
14  
15 2. Betty and Guy Beatty Center for Integrated Research, Inova Health System, Falls Church, VA,  
16  
17 USA  
18  
19  
20  
21

22 **Corresponding author and reprint requests:**  
23

24 Zobair M. Younossi, M.D., M.P.H.

25  
26 Betty and Guy Beatty Center for Integrated Research

27  
28 Claude Moore Health Education and Research Building

29  
30 3300 Gallows Road, Falls Church, VA 22042  
31  
32

33  
34 PHONE: (703) 776-2540 FAX: (703) 776-4386, E-mail: zobair.younossi@inova.org  
35  
36  
37  
38

39 **Conflict of Interest:** There are no conflicts of interest for any of the authors.

40  
41 **Transparency Declaration:** The lead author affirms that this study is a complete assessment of  
42 the data and no important information has been omitted.  
43  
44  
45

46 **Funding Source:** Internal funds only.  
47

48 **Key Words:** Chronic liver disease, Medicare, Health Care Resource Utilization  
49

50 **Word count:** 3237 (excluding title, abstract, references and tables)  
51  
52

53 **Tables and figures:** 6  
54

55 **Supplementary Tables:** 2  
56  
57  
58  
59  
60

## ABSTRACT

**Background:** CLD is an important cause of morbidity and mortality. We aimed to describe recent trends in resource utilization and patient outcomes of patients with CLD covered by Medicare in the United States.

**Methods:** This is a retrospective cohort study of the Medicare claims. We utilized a sample of Medicare claims with a primary diagnosis of CLD based on inpatient (n = 20,943) and outpatient (n = 271,552) from 2005 to 2010. The study outcomes included hospital length of stay (LOS) and inpatient mortality as well as inpatient and outpatient inflation-adjusted charges and payments.

**Results:** Between 2005 and 2010, there was an annual decrease in LOS of 2.67% accompanied by 0.70% increase in payments and 3.94% increase in charges (all  $p < 0.001$ ) for inpatient CLD patients. Risk-adjusted in-hospital mortality decreased (odds ratio (OR), 0.91, 95% confidence interval (CI), 0.89-0.94), while post-discharge mortality remained stable (OR, 0.99, 95% CI, 0.97-1.02). Average yearly inflation-adjusted payments for outpatient healthcare utilization of CLD was \$532 in 2005 and \$566 in 2010 ( $p < 0.0001$ ). This change in payment was observed together with significant decrease in beneficiary-paid amount (21.7% to 19.0%,  $p < 0.0001$ ) and a significant increase in yearly Medicare spending (76.1% to 79.0%,  $p < 0.0001$ ). The major predictors of outpatient spending were younger age, Asian race or Hispanic ethnicity, living in California, and more diagnoses, and procedures per claim. The predictors of inpatient spending also included younger age, location, and the number of inpatient procedures.

**Conclusions:** Length of inpatient stay and inpatient mortality among Medicare beneficiaries with CLD decreased while both inpatient and outpatient spending increased.

**Limitations:**

- Discharge and admission dates were provided in quarters, making it impossible to assess the exact timing of post-discharge outcomes.
- Mortality was based only on validated deaths, which may result in under-estimated post-discharge mortality.
- Unmeasured confounders may exist in a retrospective cohort study.
- Patients may have sought care outside their Medicare plan which may affect their outcomes

## INTRODUCTION

Chronic liver disease (CLD) is a major cause of mortality and morbidity worldwide. [1,2,3,4,5] In the United States, liver-related mortality is the tenth leading cause of death with hepatitis C (HCV) and obesity-related non-alcoholic fatty liver disease (NAFLD) being the major causes of CLD [1-4,6-9].

In patients with chronic liver disease, age is known to be associated with adverse outcomes [7,8,10]. As the U.S. population ages and becomes more obese, the impact of CLD is expected to become more prominent [6,9]. Thus, in the United States, this trend is becoming especially important for the Medicare population. In this context, recent reports by The Institute of Medicine emphasized the need for a national prevention and control strategy for patients with chronic hepatitis [4].

Medicare is a U.S. national government-sponsored health insurance program that guarantees access to healthcare for the U.S. residents of 65 years of age or older, younger individuals with disabilities, those with end-stage renal disease (ESRD) or Lou Gehrig's disease. In Medicare, inpatient hospital care is covered under Part A and outpatient medical services are covered under Part B. In addition to Medicare's payment, enrollees are responsible for a number of out-of-pocket payments including deductibles and coinsurance as well as payment for uncovered services such as long-term, dental, hearing, and vision care; however, a supplemental insurance may be used to cover a certain proportion of the beneficiary-paid amount. To date, Medicare resource utilization related to CLD has not been fully assessed. The recent healthcare reform legislation will be impacting what Medicare spends and how hospitals are reimbursed. The aim

1  
2  
3 of this study was to assess the recent trends in inpatient and outpatient Medicare spending related  
4  
5 to CLD.  
6  
7  
8  
9

## 10 **METHODS**

11  
12 **Data Source:** The study analyzes Medicare inpatient and outpatient files from 2005-2010  
13  
14 submitted by outpatient and inpatient providers for reimbursement of treatment and facility costs.  
15  
16 For each year, we obtained a 5% random sample of Medicare beneficiaries that were included in  
17  
18 the Denominator Files from the Centers for Medicare & Medicaid Services (CMS) in the format  
19  
20 of Limited Data Set (LDS) Standard Analytic Files. For the sampled beneficiaries, all inpatient  
21  
22 and outpatient claims for all study years were included. This study was provided exempt status  
23  
24 by our Internal Review Board.  
25  
26  
27  
28  
29  
30  
31

32 The inpatient file contains inpatient hospital encounters incurred during the study period. Each  
33  
34 record represents a single hospital claim which includes a unique patient identifier, basic  
35  
36 demographics, admission type and discharge status, International Classification of Diseases, 9th  
37  
38 Revision, Clinical Modification (ICD-9-CM) diagnosis and procedure codes, other conditions  
39  
40 related to the Medicare bill that include various claim-related information such as being  
41  
42 homeless, unemployed, military, student or over 100 years old, hospital charges, Medicare  
43  
44 reimbursement amount, and payment from the patient and another insurance.  
45  
46  
47  
48  
49  
50

51 In outpatient files, each record represents a unique claim. Of the parameters used for the study,  
52  
53 Medicare billing data included a unique patient identifier which was used to link data for each  
54  
55 beneficiary across all Medicare files (the last day on the billing statement covered services  
56  
57  
58  
59  
60

1  
2  
3 rendered to the beneficiary, a list of up to 10 diagnoses and 6 outpatient ICD-9 procedures, total  
4 facility charges, Medicare reimbursement amount and payments from patient and other insurance  
5 providers).  
6  
7  
8  
9

10  
11  
12 Finally, the denominator file includes Medicare beneficiary enrollment, demographics and  
13 mortality information. No data elements that might permit identification of beneficiaries were  
14 left in the CLD files. We obtained institutional review board approval at Inova Fairfax Hospital,  
15 and signed a data-use agreement with the CMS.  
16  
17  
18  
19  
20  
21

## 22 **Study Population**

23  
24  
25 The following ICD-9-CM codes were used to establish the diagnosis of chronic liver disease in  
26 both inpatient and outpatient claims: viral hepatitis (070.0, 070.1, 070.20-070.23, 070.30-070.33,  
27 070.41-070.44, 070.49, 070.51-070.54, 070.59, 070.6, 070.70, 070.71, 070.9), primary liver  
28 cancer (155.0), liver disorders of iron and copper metabolism (275.0, 275.01-275.03, 275.09,  
29 275.1), esophageal varices with or without bleeding (456.0, 456.1, 456.20, 456.21), peritonitis  
30 (567.2), chronic liver disease and cirrhosis (571.0-571.3, 571.40-571.42, 571.49, 571.5, 571.6,  
31 571.8, 571.9), sequelae of chronic liver disease such as hepatic coma, portal hypertension, and  
32 hepatorenal syndrome (572.2-572.4, 572.8), other chronic disorders of liver and biliary tract  
33 (573.3, 573.5, 573.8, 576.1, 576.8), pruritis (698.9), cholestatic jaundice (782.4), hepatomegaly  
34 (789.1), ascites (789.5), nonspecific abnormal serum enzyme levels (790.4-790.5), abnormal  
35 liver scan/function study (794.8), and indicators of CLD coded as factors and external causes  
36 (E947.9, V02.60, V02.61, V02.62, V02.69, V42.7). A claim was included in the study if the  
37 principal diagnosis for that claim was CLD-related. A patient might have had more than one  
38  
39  
40  
41  
42  
43  
44  
45  
46  
47  
48  
49  
50  
51  
52  
53  
54  
55  
56  
57  
58  
59  
60

1  
2  
3 claim per year. In such case, claims with the principal diagnosis other than CLD were not  
4 included even if that patient had established diagnosis of CLD according to other claims. As a  
5 result, only CLD-related spending was evaluated.  
6  
7  
8  
9

10  
11  
12 Patient baseline characteristics were derived from Medicare denominator file, which includes age  
13 categories at admission, gender, race/ethnicity, end stage renal disease (ESRD) status, residence  
14 (Northeast, South, Midwest, West, and California), discharge disposition type, continued care,  
15 hospice status, and inpatient death. Comorbidities scores were derived from up to 9 secondary  
16 diagnosis codes using Deyo-modification of the Charlson score developed for claims data  
17 analysis [11]. The total number of diagnoses and total number of procedures in each record were  
18 also included in the analysis. Claims with missing data on any of the study variables were  
19 excluded from analysis.  
20  
21  
22  
23  
24  
25  
26  
27  
28  
29  
30  
31  
32  
33

### 34 **Inpatient Outcomes**

35  
36 Both resource utilization and short-term mortality outcomes were assessed. Resource utilization  
37 parameters included length of stay (LOS), hospital charges and total payments. LOS is defined as  
38 the number of full days a patient stays in the hospital. Since admission and discharge dates were  
39 not provided in the data, LOS was calculated as the total number of days of care in each claim,  
40 which included the number of days of care that are chargeable and the number of days of care  
41 that are not chargeable to Medicare facility utilization. If a patient was admitted and discharged  
42 on the same day, LOS was counted as one day. According to Medicare policy, patients need to  
43 pay certain amount of coinsurance for LOS over 60 days, and no coinsurance for LOS 1-60 days.  
44  
45  
46  
47  
48  
49  
50  
51  
52  
53  
54  
55  
56  
57  
58  
59  
60  
To remove the potential effect of coinsurance on LOS, cases with LOS over 60 days were  
dismissed from analysis. Total payments for patient services in each claim was calculated as the



1  
2  
3 sum of Medicare reimbursement amount, primary insurance payment, beneficiary-paid amounts  
4 (copay, deductibles and coinsurance). We used total payment as a surrogate for the total payment  
5 for patient services for each claim, which was calculated as the sum of Medicare reimbursement  
6 amount, primary insurance payment, beneficiary-paid amounts (copay, deductibles and  
7 coinsurance). Since the rates that Medicare pays for covered services are negotiated at the  
8 beginning of each year by the government agency, the historic average of 3% was selected as an  
9 annual coefficient of inflation for adjustment of hospital charges and total payments to the  
10 dollars of 2010. The unit of analysis was the encounter for LOS, hospital charge and total  
11 payments.  
12  
13  
14  
15  
16  
17  
18  
19  
20  
21  
22  
23  
24  
25  
26

27 Mortality outcomes were evaluated for each calendar year. In the case of multiple  
28 hospitalizations within a calendar year, the most recent claim was designated as the index event.  
29 If a patient was hospitalized for CLD in multiple calendar years, he was counted as new patient  
30 for each year. In-hospital mortality was defined as an in-hospital record with discharge status of  
31 “Dead”, regardless of cause or LOS. Post-discharge mortality was defined as a death from any  
32 cause after hospital discharge, after excluding patients who died in hospital. The period of  
33 follow-up for post-discharge mortality was the end of March of the year following patient’s  
34 index discharge. We determined post-discharge mortality based on the death date recorded in the  
35 Medicare denominator file.  
36  
37  
38  
39  
40  
41  
42  
43  
44  
45  
46  
47  
48  
49

## 50 **Outpatient Outcomes**

51 Major resource utilization parameters including total charges, total payments, Medicare spending  
52 and the proportion of beneficiary-paid amount were calculated. Total per-claim payment was the  
53  
54  
55  
56  
57  
58  
59  
60

1  
2  
3 sum of Medicare reimbursement amount, primary insurance payment, and the beneficiary-paid  
4 amount which included all applicable co-payments, deductibles and coinsurance. If more than  
5 one inpatient or outpatient claim was reported for a patient in a given year, then, for that patient  
6 in that year, the resource utilization parameters were added up, and the total yearly resource  
7 utilization, together with the average proportion of beneficiary-paid amount in percent of total  
8 payments, were calculated.  
9  
10  
11  
12  
13  
14  
15  
16  
17  
18  
19

### 20 **Statistical Analysis**

21  
22 We described the baseline characteristics of the study population by presenting frequencies for  
23 categorical variables and mean  $\pm$  SD for continuous variables. Mean LOS, hospital charge and  
24 total payments for each claim were calculated. Unadjusted rates of all-cause in-hospital mortality  
25 and post-discharge mortality were estimated. In both analyses, all available clinical and  
26 demographic parameters were compared across the study years to identify parameters that  
27 changed significantly over time, using chi-square test for binary or categorical parameters (age,  
28 gender, race, mortality, etc) and non-parametric Kruskal-Wallis Test for continuous parameters  
29 (length of stay, hospital charge, Charlson score, number of diagnosis, number of procedures).  
30  
31  
32  
33  
34  
35  
36  
37  
38  
39  
40  
41  
42

43 Multivariable regression analyses were used to assess the independent associations of patient  
44 clinic-demographics characteristics with resource utilization. LOS, provider or hospital charge,  
45 and total payments were found to be skewed to the right in a non-normal distribution and  
46 therefore were analyzed using generalized linear model (GLM) with a gamma error distribution  
47 and a log-link function. Association between a risk factor and the outcome was analyzed with the  
48 independent-sample *t* test, which was used to compare the means of outcome for those with and  
49  
50  
51  
52  
53  
54  
55  
56  
57  
58  
59  
60

1  
2  
3 those without the risk factor. The adjusted relationship between risk factors and each outcome  
4  
5 were estimated using coefficients from these models, which were exponentiated to yield a  
6  
7 percentage change in the outcomes associated with each risk factor. Initially, all available  
8  
9 demographic parameters, location and resource utilization were tested in the multiple regression  
10  
11 model as potential predictors for the outcomes, but then only predictors with p-values of 0.05 or  
12  
13 less were left.  
14  
15

16  
17  
18  
19  
20 Multivariate logistic regression analysis was performed on in-hospital mortality and post-  
21  
22 discharge mortality to determine the independent effect of factors known to influence prognosis.  
23  
24 The association between a risk factor and death was analyzed with the  $\chi^2$  test, which was used to  
25  
26 compare the risk-adjusted rate of mortality among those with and those without the risk factor.  
27  
28 Odds ratio was used to estimate the adjusted association between each predictor and mortality.  
29  
30 Significance tests and confidence intervals (CIs) were based on 95% confidence level.  
31  
32 Differences were considered significant at the  $P < .05$  level  
33  
34  
35  
36  
37

## 38 RESULTS

### 39 *Demographics and outcomes for inpatients with CLD (Table 1 and 2)*

40  
41  
42 The analysis included 20,943 hospitalizations with a principal diagnosis of CLD during 2005-  
43  
44 2010 for a total of 14,774 patients. The annual number of claims ranged from minimum of 4,020  
45  
46 in 2005 to maximum of 4,333 in 2007. The annual percent of re-hospitalizations was about 29%.  
47  
48  
49 The most common primary diagnoses were hepatic encephalopathy (21.6%), non-alcoholic  
50  
51 cirrhosis of liver (15.7%), alcoholic cirrhosis of liver (13.0%), and primary liver cancer (6.4%).  
52  
53  
54  
55  
56  
57  
58  
59  
60

1  
2  
3 During the study period, the observed in-hospital mortality decreased from 11.75% to 8.73% (p  
4 < 0.001), post-discharge mortality increased from 34.7% to 35.8% (p = 0.036), number of  
5 diagnoses per claim increased from 7.90 to 8.60 (p < 0.001), and Charlson score increased (1.35  
6 to 1.43; p < 0.001). The proportion of patients discharged to home decreased, while the  
7 proportion discharged to hospice or continued care increased.  
8  
9

10  
11  
12  
13  
14  
15  
16  
17 The number of admissions, diagnoses and procedures were independently associated with  
18 increased risk for in-hospital mortality. Independent predictors of post-discharge mortality were  
19 discharge disposition, number of admissions, Charlson score, gender and LOS during  
20 hospitalization. Age appeared to be a stronger predictor of post-discharge mortality than in-  
21 hospital mortality. Furthermore, there were regional and racial variations in post-discharge  
22 mortality using the standard reference categories (Table 3).  
23  
24  
25  
26  
27  
28  
29  
30  
31  
32  
33

#### 34 *Inpatient spending for Medicare beneficiaries with CLD*

35  
36 The proportion of CLD-related inpatient spending in the total inpatient spending for Medicare  
37 beneficiaries increased from 0.63% in 2005 to 0.81% in 2010. Hospital charges increased from  
38 \$34,398 to \$43,354 per claim (p < 0.001), total payments increased from \$11,786 to \$12,773 per  
39 claim (p < 0.001), average LOS decreased from 6.11 days to 5.96 days (p = 0.002). Independent  
40 predictors of increases in hospital charges included number of diagnoses and procedures, LOS  
41 and dying during the hospitalization. Independent predictors of increases in estimated costs were  
42 similar. Independent predictors of LOS increases were race, ESRD, disposition other than to  
43 home, number of diagnoses, and number of procedures (Table 4).  
44  
45  
46  
47  
48  
49  
50  
51  
52  
53  
54  
55  
56  
57  
58  
59  
60

1  
2  
3  
4  
5  
6  
7  
8  
9  
10  
11  
12  
13  
14  
15  
16  
17  
18  
19  
20  
21  
22  
23  
24  
25  
26  
27  
28  
29  
30  
31  
32  
33  
34  
35  
36  
37  
38  
39  
40  
41  
42  
43  
44  
45  
46  
47  
48  
49  
50  
51  
52  
53  
54  
55  
56  
57  
58  
59  
60

*Demographics and outcomes for outpatients with CLD (Table 1):*

A total of 271,552 CLD-related outpatient claims for 137,347 unique Medicare beneficiaries with CLD were included for the study period. The number of patients with at least one claim related to their CLD ranged from the minimum of 21,578 in 2008 to the maximum of 23,946 in 2005, representing approximately 430,000-480,000 Medicare beneficiaries with CLD nationwide. The average number of claims per patient did not change during the study period. The most prevalent primary diagnoses on outpatient claims were non-alcoholic cirrhosis of liver (11.5%), abnormal liver scan (10.4%), chronic hepatitis C without mention of hepatic coma (8.8%), other diagnosis of chronic liver disease (5.6%), liver disorders of iron metabolism (5.4%), nonspecific elevation of levels of transaminases (5.4%), and other nonspecific abnormal liver enzymes (5.2%). Similar to findings with the inpatient population, the proportion of patients who were less than 65 years old increased. This was primarily driven by increases in the proportion of patients who were Medicare eligible because of disability.

*Outpatient spending for Medicare beneficiaries with CLD (Table 5 and Table 6)*

The proportion of CLD-related outpatient spending in the total outpatient spending for Medicare beneficiaries decreased from 0.44% in 2005 to 0.37% in 2010. The average number of claims per year did not change during the study period. Average total payment, average payment by Medicare, average charge, and Medicare's responsibility increased over time ( $p < 0.001$  for all). However, the average payment by patients and beneficiary-paid amount decreased over time ( $p < 0.001$  for all). After multivariate analysis, total payments actually decreased over the study period. The average number of diagnoses per claim, procedures per claim, and the presence of ESRD were independently associated with total payments. Being in the youngest age group (less

1  
2  
3 than 65 years old) was the most important predictor of payments. Also, there were racial and  
4  
5 geographic variations in payments – being Asian or Hispanic were strong predictors of total  
6  
7 payments. A Midwest location was inversely related to payment whereas location in California  
8  
9 was strongly related to higher payment. In terms of proportion of beneficiary-paid amount,  
10  
11 independent predictors were similar to payments except the presence of ESRD was not  
12  
13 associated.  
14  
15  
16  
17  
18  
19

## 20 DISCUSSION

21  
22 This is the first study to report inpatient and outpatient clinical outcomes and Medicare resource  
23  
24 utilization for patients with CLD. The majority of CLD primary diagnoses were hepatic  
25  
26 encephalopathy and cirrhosis. Interestingly, the Medicare population with ESRD and younger  
27  
28 than 65 are becoming a larger portion of this cohort, Although the observed increase in the  
29  
30 number of diagnoses per claim and Charlson index may be due to the CLD population becoming  
31  
32 more complex with more comorbidities and related conditions, prior reports suggest that such  
33  
34 changes might also be explained by the documentation and coding practices [12].  
35  
36  
37  
38  
39

40  
41 Our data showed that both in-hospital mortality and length of stay decreased. The potential  
42  
43 reasons for a decrease in inpatient mortality include improvements in quality, efficiency of care  
44  
45 delivery and increasing use of hospice services [13] while the decrease in the length of stay may  
46  
47 also be due to changes in payment arrangements and discharge practices. Oddly, the presence of  
48  
49 ESRD appeared to be “protective” against in-hospital mortality perhaps because the patients are  
50  
51 younger and receive closer care for their ESRD. We believe that understanding these variations  
52  
53  
54  
55  
56  
57  
58  
59  
60

1  
2  
3 in post-discharge mortality may provide guidance to policy makers for appropriate resource  
4 allocation.[14]  
5  
6  
7  
8  
9

10 After adjusting for inflation, hospitalizations charges and total payments to Medicare increased  
11 (p<0.0001). As expected, independent predictors of charges, payments, and LOS were similar.  
12 Of note, minorities experienced higher charges, payments, and LOS and could be another target  
13 for better allocation of resources. The fact that patients who were discharged to extended care  
14 facilities or who died were independently associated with higher resource utilization, is  
15 consistent with the notion that patients who are at highest risk for mortality consume the greatest  
16 portion of the health care resources. [15,16] It has been previously reported that Hispanic  
17 patients with CLD (especially NAFLD) are at higher risk for adverse outcome such as cirrhosis  
18 and HCC which this study also corroborates as Hispanic ethnicity is independently associated  
19 with resource utilization.[6,9].  
20  
21  
22  
23  
24  
25  
26  
27  
28  
29  
30  
31  
32  
33  
34  
35

36 In the outpatient Medicare population, cirrhosis, abnormal liver imaging, and chronic hepatitis C  
37 being the most common diagnoses. Once again, the proportion of patients younger than 65 years  
38 old and disability eligible increased. As charges, payments from Medicare and proportion of  
39 Medicare's responsibility increased, the beneficiary-paid amount and estimated payments  
40 decreased. Racial and geographic variations in payment were again observed. Our study also  
41 showed that younger age was the most important independent predictor of Medicare spending.  
42 This is probably due to the fact that younger patients with CLD who qualify for Medicare may  
43 be sicker. [17,18]  
44  
45  
46  
47  
48  
49  
50  
51  
52  
53  
54  
55  
56  
57  
58  
59  
60

1  
2  
3 There were some limitations to our study. The exact dates were not available for the year 2005-  
4  
5 2009, making it impossible to assess the timing of post-discharge outcomes. Second, we may  
6  
7 have under-estimated post-discharge mortality. This may be due to the LDS denominator files  
8  
9 for each calendar year are based on information known to CMS in March of the year following  
10  
11 hospitalizations so that some patients without date of death may have been dead but treated as  
12  
13 alive. However, 96% of death dates were validated making the impact of the “un-validated death  
14  
15 date” on mortality very small. The restricted mortality data we had access to did not allow to  
16  
17 account for variability in the length of post-discharge follow-up in a survival analysis. Because  
18  
19 this was a retrospective cohort study, there were unmeasured confounders for which we could  
20  
21 not adjust for, such as the availability of healthcare providers in patient's place of residence,  
22  
23 history of major interventions, marital and socioeconomic status, history of substance abuse or  
24  
25 psychiatric conditions, metabolic disorders, as well as the results of physical examination and  
26  
27 physical activity which may be especially important for appreciating health status of the elderly  
28  
29 population. We also couldn't determine whether patients sought care outside their Medicare plan  
30  
31 which potentially may have changed outcomes.[19]  
32  
33  
34  
35  
36  
37  
38  
39  
40

41 In conclusion, CLD is a common disease entity with important patient and financial outcomes  
42  
43 for the Medicare population. Although in-hospital mortality and LOS are decreasing, mortality  
44  
45 after discharge remains stable. Also, outpatient spending by Medicare is increasing. Our study of  
46  
47 chronic hepatitis C in the Medicare beneficiaries showed similar results. [20] Independent  
48  
49 demographic and clinical predictors which we identified for payment and clinical outcomes can  
50  
51 be used to target resource allocation for prevention. This last point is especially important as the  
52  
53 Affordable Care Act (ACA) has begun, ensuring insurance coverage is available to all and  
54  
55  
56  
57  
58  
59  
60



1  
2  
3 patients with pre-existing conditions are not excluded nor do they suffer from lapse in coverage.  
4  
5 [21] It will be imperative to track the impact of the ACA on the long-term outcomes of patients  
6  
7 living with CLD especially when one reviews the patients most likely to have CLD are also the  
8  
9 patients most likely to be uninsured. Hispanics are the second most prevalent group to be  
10  
11 uninsured, especially the young Hispanic male who is working. [22] In this study, younger  
12  
13 Hispanic males were more likely to have CLD than any other group. Therefore, efforts should  
14  
15 be directed to ensure this group becomes knowledgeable about the importance and availability of  
16  
17 insurance as well as healthy living.  
18  
19  
20  
21  
22  
23  
24  
25  
26  
27  
28  
29  
30  
31  
32  
33  
34  
35  
36  
37  
38  
39  
40  
41  
42  
43  
44  
45  
46  
47  
48  
49  
50  
51  
52  
53  
54  
55  
56  
57  
58  
59  
60

**Author Roles:**

-Zobair M. Younossi-study design, data and results interpretation and clinical interpretation, writing, reviewer

-Li Zheng-data development, statistical analysis and interpretation for inpatient data, writing, reviewer

-Maria Stepanova-data development, statistical analysis and interpretation for outpatient, writing, reviewer

-Chapy Venkatesan-study design, results interpretation and clinical interpretation, writing, reviewer

-Alita Mishra-study design, results interpretation and clinical interpretation, writing, reviewer

**Competing Interests:** None

**Data Sharing:** Our data source, Medicare, does not allow sharing of data.

**REFERENCES**

- 1 Gravitz L. Introduction: a smouldering public-health crisis. *Nature* 2011;474(7350):S2–4.
- 2 Chak E, Tala AH, Sherman KE, et al. Hepatitis C virus infection in the USA: an estimate of true prevalence. *Liver Int.* 2011;31:1090-1101.
- 3 Ly KN, Xing J, Klevens RM, et al. The increasing burden of mortality from viral hepatitis in the United States between 1999 and 2007. *Ann Intern Med.* 2012 Feb 21;156(4):271-8.
- 4 Institute of Medicine. Hepatitis and Liver Cancer: A National Strategy for Prevention and Control of Hepatitis B and C. Washington, DC: The National Academies Press; 2010.
- 5 Thomas DL, Seeff LB. Natural history of hepatitis C. *Clin Liver Dis.* 2005;9:383-98,vi.
- 6 Lazo M, Hernaez R, Bonekamp S, et al. Non-alcoholic fatty liver disease and mortality among US adults: prospective cohort study. *BMJ.* 2011 Nov 18;343:d6891.
- 7 Pradat P, Voirin N, Tillmann HL, et al. Progression to cirrhosis in hepatitis C patients: an age-dependent process. *Liver Int.* 2007;27(3):335–9.
- 8 Singer ME, Younossi ZM. Cost-effectiveness of screening for hepatitis C virus in asymptomatic, average risk adults: has the time come? *Am. J. Med.* 2001;111:614-621.
- 9 Koebnick C, Getahun D, Reynolds K, et al. Trends in nonalcoholic fatty liver disease-related hospitalizations in US children, adolescents, and young adults. *J Pediatr Gastroenterol Nutr.* 2009 May;48(5):597-603. doi: 10.1097/MPG.0b013e318192d224.
- 10 Bruno S, Zuin M, Crosignani A, et al. Predicting mortality risk in patients with compensated HCV-induced cirrhosis: a long-term prospective study. *Am J Gastroenterology.* 2009;104(5):1147–58.
- 11 Deyo RA, Cherkin DC, Ciol MA. Adapting a clinical comorbidity index for use with ICD-9-CM administrative databases. *J Clin Epidemiol.* 1992;45 (6) 613- 61

- 1  
2  
3 12 Lindenauer PK, Lagu T, Shieh MS, et al. Association of diagnostic coding with trends in  
4 hospitalizations and mortality of patients with pneumonia, 2003-2009. *JAMA*. 2012 Apr  
5  
6 4;307(13):1405-13.  
7  
8  
9  
10 13 Yong-Fang K, Goodwin J. Impact of Hospitalists on Length of Stay in the Medicare  
11 Population: Variation by Hospital and Patient Characteristics. *J Am Geriatr Soc*. 2010; 58(9):  
12  
13 1649–1657.  
14  
15  
16  
17 14 Newhouse JP, Garber AM. Geographic Variation in Medicare Services. *N Engl J Med* 2013.  
18  
19 368(16): 1465-1468.  
20  
21  
22 15 Pyenson B, Fitch K, Iwasaki K. Consequences of Hepatitis C Virus (HCV): Costs of a Baby  
23 Boomer Epidemic of Liver Disease. New York, NY: Milliman, Inc; May 18, 2009. [Internet,  
24  
25 cited 2013 Mar 12]. Available from: [http://publications.milliman.com/research/health-](http://publications.milliman.com/research/health-rr/pdfs/consequences-hepatitis-c-virus-RR05-18-09.pdf)  
26  
27 [rr/pdfs/consequences-hepatitis-c-virus-RR05-18-09.pdf](http://publications.milliman.com/research/health-rr/pdfs/consequences-hepatitis-c-virus-RR05-18-09.pdf)  
28  
29  
30  
31 16 Wong JB, McQuillan GM, McHutchison JG, et al. Estimating future hepatitis C morbidity,  
32 mortality, and costs in the United States. *Am J Public Health* 2000;90(10):1562–9.  
33  
34  
35  
36 17 Coughlin TA, Waidmann TA, Phadera L. Among dual eligibles, identifying the highest-cost  
37 individuals could help in crafting more targeted and effective responses. *Health Aff* (Millwood).  
38  
39 2012 May;31(5):1083-91. doi: 10.1377/hlthaff.2011.0729. Epub 2012 Apr 18.  
40  
41  
42  
43 18 Bubolz T, Emerson C, Skinner J. State spending on dual eligibles under age 65 shows  
44 variations, evidence of cost shifting from Medicaid to Medicare. *Health Aff* (Millwood). 2012  
45  
46 May;31(5):939-47. doi: 10.1377/hlthaff.2011.0921.  
47  
48  
49  
50 19 Quan H, Sundararajan V, Halfon P, et al. Coding algorithms for defining comorbidities in  
51 ICD-9-CM and ICD-10 administrative data. *Med Care* 2005 Nov; 43(11):1073-1077.  
52  
53  
54  
55  
56  
57  
58  
59  
60

1  
2  
3 20 Younossi ZM, Stepanova M, Mishra A, et al. The impact of chronic hepatitis C on resource  
4 utilization and in-patient mortality for Medicare beneficiaries between 2005 and 2010. *AP&T*  
5  
6 2013 Aug. doi:10.1111/apt.12485  
7  
8

9  
10 21 Medicare Payment Advisory Group. Medicare and Health Care Spending. June 2012.

11  
12 Obtained from the world wide web at:

13  
14 <http://www.medpac.gov/documents/Jun12DataBookEntireReport.pdf>. Last accessed on 8 Oct  
15  
16  
17 2013.  
18

19  
20 22 Centers for Medicare and Medicaid Services. Audience Segmentation for the Emerging  
21  
22 Health Care Marketplace. March 22, 2013. Obtained from the world wide web at  
23  
24 <http://www.marketplace.cms.gov>. Last accessed on 8 Oct 2013.  
25  
26  
27  
28  
29  
30  
31  
32  
33  
34  
35  
36  
37  
38  
39  
40  
41  
42  
43  
44  
45  
46  
47  
48  
49  
50  
51  
52  
53  
54  
55  
56  
57  
58  
59  
60

**Table 1.** Clinico-demographic characteristics of Medicare beneficiaries who sought inpatient and outpatient care in 2005-2010.

| Characteristics                 | Inpatient   | P-value * | Outpatient   | P-value * |
|---------------------------------|-------------|-----------|--------------|-----------|
| No. of patients                 | 14,774      |           | 137,347      |           |
| No. of hospitalizations         | 20,943      |           | 271,552      |           |
| Percent of re-hospitalizations  | 29.46       |           | NA           |           |
| Number of diagnoses, mean (SD)  | 8.24 (1.58) | <0.0001   | 2.26 (1.72)  | <0.0001   |
| Number of procedures, mean (SD) | 1.68 (1.78) | 0.1184    | 0.001 (0.07) | 0.0465    |
| Charlson score, mean (SD)       | 1.44 (1.75) | <0.0001   | 0.95 (1.23)  | <0.0001   |
| Age                             |             |           |              |           |
| <65                             | 38.84       | <0.0001   | 32.78        | <.0001    |
| 65-69                           | 17.88       | <0.0001   | 21.46        | 0.6715    |
| 70-74                           | 14.99       | 0.0004    | 16.96        | 0.0003    |
| 75-79                           | 11.56       | <0.0001   | 13.31        | <.0001    |
| 80-84                           | 9.29        | 0.0454    | 9.18         | <.0001    |
| 85 and over                     | 7.45        | 0.2001    | 6.30         | 0.2088    |
| Race                            |             |           |              |           |
| White                           | 80.00       | 0.0025    | 81.53        | <.0001    |
| Black                           | 10.71       | 0.0911    | 10.44        | <.0001    |
| Hispanic                        | 4.61        | 0.0718    | 2.71         | 0.2113    |
| Other                           | 4.67        | 0.1445    | 2.62         | 0.0092    |
| Male gender                     | 55.09       | 0.5655    | 44.93        | 0.7866    |
| ESRD                            | 6.40        | <0.0001   | 2.54         | 0.4234    |
| Discharge status                |             |           |              |           |
| Home                            | 51.90       | <0.0001   | NA           | NA        |
| Continued care                  | 36.70       | <0.0001   | NA           | NA        |
| Hospice                         | 4.75        | <0.0001   | NA           | NA        |
| Died                            | 6.65        | <0.0001   | NA           | NA        |
| Region                          |             |           |              |           |
| Northeast                       | 19.83       | 0.2126    | 20.66        | 0.5634    |
| South                           | 40.58       | 0.4086    | 35.01        | 0.0256    |
| Midwest                         | 22.28       | 0.0138    | 26.11        | 0.1438    |
| West                            | 8.31        | 0.3719    | 9.25         | 0.2413    |
| California                      | 9.00        | <0.0001   | 8.97         | 0.0006    |

\* p-value represents the difference in the parameter between the study years

NA - not applicable

**Table 2.** Resource utilization and mortality outcomes for Medicare beneficiaries with CLD who sought inpatient care in 2005-2010.

|                                  | 2005                          | 2006                          | 2007                          | 2009                          | 2010                          | p       |
|----------------------------------|-------------------------------|-------------------------------|-------------------------------|-------------------------------|-------------------------------|---------|
| Length of stay                   |                               |                               |                               |                               |                               |         |
| Mean (SD)                        | 6.11 (5.75)                   | 6.21 (6.23)                   | 6.06 (5.71)                   | 5.83 (5.71)                   | 5.96 (5.79)                   | 0.0017  |
| Median(IQR)                      | 4 (3, 8)                      | 4 (3, 7)                      | 4 (3, 7)                      | 4 (2, 7)                      | 4 (3, 7)                      |         |
| Hospital charge                  |                               |                               |                               |                               |                               |         |
| Mean (SD)                        | 34,398<br>(55,946)            | 37,544<br>(67,000)            | 36,200<br>(52,282)            | 40,636<br>(63,727)            | 43,354<br>(70,128)            | <0.0001 |
| Median(IQR)                      | 19,199<br>(10,804,<br>36,364) | 20,059<br>(11,050,<br>39,295) | 21,741<br>(12,032,<br>40,061) | 22,735<br>(12,291,<br>43,633) | 24,266<br>(13,768,<br>44,974) |         |
| Estimated cost                   |                               |                               |                               |                               |                               |         |
| Mean (SD)                        | 11,786<br>(15,413)            | 12,039<br>(1,5893)            | 12,029<br>(24,037)            | 12,447<br>(16,006)            | 12,773<br>(17,359)            | <0.0001 |
| Median(IQR)                      | 8,411<br>(7,295,<br>10,771)   | 8,413<br>(7,283,<br>10,698)   | 8,490<br>(7,255,<br>10,849)   | 9,459<br>(6,134,<br>12,252)   | 9,665<br>(6,147,<br>12,698)   |         |
| In-hospital mortality rate, %    | 11.75                         | 9.94                          | 8.17                          | 8.75                          | 8.73                          | 0.0001  |
| Post-discharge mortality rate, % | 34.68                         | 31.26                         | 34.89                         | 34.84                         | 35.79                         | 0.0363  |

**Table 3.** Predictors of in-hospital mortality and overall post-discharge mortality in Medicare beneficiaries hospitalized for CLD in 2005-2010\*.

| Predictors            | In-hospital Mortality |         | Post-discharge Mortality† |         |
|-----------------------|-----------------------|---------|---------------------------|---------|
|                       | OR (95% CI)           | P-value | OR (95% CI)               | P-value |
| Age                   |                       |         |                           |         |
| 65-69                 | Ref                   |         | Ref                       |         |
| <65                   | 0.85 (0.72, 1.00)     | 0.0537  | 0.79 (0.70, 0.89)         | 0.0001  |
| 70-74                 | 1.03 (0.85, 1.25)     | 0.7882  | 1.08 (0.94, 1.25)         | 0.2628  |
| 75-79                 | 1.25 (1.03, 1.53)     | 0.0267  | 1.27 (1.10, 1.48)         | 0.0012  |
| 80-84                 | 0.89 (0.70, 1.12)     | 0.3045  | 1.24 (1.06, 1.45)         | 0.0063  |
| 85 and over           | 1.00 (0.79, 1.27)     | 0.9967  | 1.52 (1.30, 1.79)         | <0.0001 |
| Gender                |                       |         |                           |         |
| Female                | Ref                   |         | Ref                       |         |
| Male                  | 1.26 (1.12, 1.41)     | 0.0001  | 1.34 (1.24, 1.46)         | <0.0001 |
| Race                  |                       |         |                           |         |
| White                 | Ref                   |         | Ref                       |         |
| Black                 | 1.15 (0.96, 1.38)     | 0.1204  | 0.83 (0.72, 0.95)         | 0.0073  |
| Hispanic              | 0.77 (0.56, 1.06)     | 0.1101  | 0.92 (0.75, 1.13)         | 0.4287  |
| Other                 | 1.30 (1.00, 1.67)     | 0.0482  | 0.84 (0.68, 1.02)         | 0.0834  |
| ESRD                  |                       |         |                           |         |
| No                    | Ref                   |         | Ref                       |         |
| Yes                   | 0.69 (0.54, 0.89)     | 0.0034  | 0.96 (0.81, 1.13)         | 0.6072  |
| Number of admissions  |                       |         |                           |         |
| 1                     | Ref                   |         | Ref                       |         |
| ≥2                    | 1.58 (1.39-1.79)      | <0.0001 | 1.66 (1.51-1.83)          | <0.0001 |
| Discharge destination |                       |         |                           |         |
| Home                  | N/A                   |         | Ref                       |         |
| Continued care        | N/A                   |         | 2.43 (2.23, 2.65)         | <0.0001 |
| Hospice               | N/A                   |         | 49.22 (37.13, 65.25)      | <0.0001 |
| Region                |                       |         |                           |         |
| Northeast             | Ref                   |         | Ref                       |         |
| South                 | 0.87 (0.75, 1.01)     | 0.0613  | 1.20 (1.08, 1.35)         | 0.0012  |
| Midwest               | 0.70 (0.59, 0.83)     | <0.0001 | 1.01 (0.89, 1.15)         | 0.8582  |
| West                  | 0.80 (0.63, 1.01)     | 0.0639  | 1.24 (1.05, 1.46)         | 0.0130  |
| California            | 0.86 (0.69, 1.08)     | 0.1951  | 1.22 (1.04, 1.45)         | 0.0169  |
| Calendar Year         | 0.91 (0.89, 0.94)     | <0.0001 | 0.99 (0.97, 1.02)         | 0.4909  |
| Number of diagnosis   | 1.22 (1.16, 1.28)     | <0.0001 | 1.05 (1.02, 1.08)         | 0.0007  |
| Number of procedures  | 1.32 (1.28, 1.37)     | <0.0001 | 0.99 (0.96, 1.01)         | 0.3812  |
| Charlson score        | 1.03 (0.99, 1.06)     | 0.1151  | 1.23 (1.20, 1.26)         | <0.0001 |
| LOS                   | 1.01 (1.00, 1.02)     | 0.1244  | 1.01 (1.00, 1.02)         | 0.0039  |

\* Data in 2008 were excluded from analysis due to missing information on patient's residence region.



**Table 4.** Predictors of LOS, hospital charge and total payment of hospitalizations of Medicare beneficiaries for CLD in 2005-2010\*.

| Predictors            | LOS Increase                  |                   | Hospital Charge Increase†      |                   | Estimated Cost Increase†       |                   |
|-----------------------|-------------------------------|-------------------|--------------------------------|-------------------|--------------------------------|-------------------|
|                       | % (95% CI) †                  | P-value           | % (95% CI) ‡                   | P-value           | % (95% CI) ‡                   | P-value           |
| Age                   |                               |                   |                                |                   |                                |                   |
| 65-69                 | Ref                           |                   | Ref                            |                   | Ref                            |                   |
| <65                   | 0.07 (-2.47, 2.61)            | 0.9557            | <b>-2.64 (-4.92, -0.36)</b>    | <b>0.0233</b>     | <b>5.09 (3.11, 7.06)</b>       | <b>&lt;0.0001</b> |
| 70-74                 | -0.99 (-4.07, 2.09)           | 0.5293            | <b>-4.71 (-7.48, -1.94)</b>    | <b>0.0009</b>     | <b>-6.08 (-8.48, -3.68)</b>    | <b>&lt;0.0001</b> |
| 75-79                 | 2.36 (-0.97, 5.69)            | 0.1649            | <b>-3.05 (-6.05, -0.06)</b>    | <b>0.0456</b>     | <b>-8.15 (-10.74, -5.55)</b>   | <b>&lt;0.0001</b> |
| 80-84                 | 2.85 (-0.72, 6.42)            | 0.1181            | <b>-3.22 (-6.44, -0.01)</b>    | <b>0.0496</b>     | <b>-11.91 (-14.70, -9.13)</b>  | <b>&lt;0.0001</b> |
| 85 and over           | 1.14 (-2.73, 5.00)            | 0.5635            | -2.45 (-5.94, 1.03)            | 0.1673            | <b>-14.17 (-17.19, -11.16)</b> | <b>&lt;0.0001</b> |
| Gender                |                               |                   |                                |                   |                                |                   |
| Female                | Ref                           |                   | Ref                            |                   | Ref                            |                   |
| Male                  | <b>-4.05 (-5.85, -2.26)</b>   | <b>&lt;0.0001</b> | <b>1.69 (0.07, 3.31)</b>       | <b>0.0407</b>     | <b>4.65 (3.25, 6.06)</b>       | <b>&lt;0.0001</b> |
| Race                  |                               |                   |                                |                   |                                |                   |
| White                 | Ref                           |                   | Ref                            |                   | Ref                            |                   |
| Black                 | <b>11.72 (8.80, 14.64)</b>    | <b>&lt;0.0001</b> | <b>4.86 (2.23, 7.48)</b>       | <b>0.0003</b>     | <b>2.66 (0.38, 4.93)</b>       | <b>0.0220</b>     |
| Hispanic              | <b>9.71 (5.47, 13.95)</b>     | <b>&lt;0.0001</b> | <b>11.04 (7.23, 14.85)</b>     | <b>&lt;0.0001</b> | <b>9.54 (6.23, 12.85)</b>      | <b>&lt;0.0001</b> |
| Other                 | 1.29 (-2.98, 5.56)            | 0.5536            | <b>3.98 (0.15, 7.81)</b>       | <b>0.0417</b>     | <b>8.17 (4.85, 11.49)</b>      | <b>&lt;0.0001</b> |
| ESRD                  |                               |                   |                                |                   |                                |                   |
| No                    | Ref                           |                   | Ref                            |                   | Ref                            |                   |
| Yes                   | <b>3.84 (0.06, 7.62)</b>      | <b>0.0467</b>     | <b>-5.45 (-8.87, -2.04)</b>    | <b>0.0017</b>     | -1.07 (-4.03, 1.89)            | 0.4780            |
| Discharge destination |                               |                   |                                |                   |                                |                   |
| Home                  | Ref                           |                   | Ref                            |                   | Ref                            |                   |
| Continued care        | <b>37.32 (35.36, 39.29)</b>   | <b>&lt;0.0001</b> | 0.46 (-1.34, 2.26)             | 0.6148            | <b>-11.70 (-13.27, -10.13)</b> | <b>&lt;0.0001</b> |
| Hospice               | <b>35.98 (31.70, 40.25)</b>   | <b>&lt;0.0001</b> | -0.08 (-3.96, 3.79)            | 0.9662            | <b>-7.56 (-10.91, -4.22)</b>   | <b>&lt;0.0001</b> |
| Died                  | <b>25.86 (22.14, 29.58)</b>   | <b>&lt;0.0001</b> | <b>5.58 (2.23, 8.92)</b>       | <b>0.0011</b>     | 1.54 (-1.36, 4.44)             | 0.2978            |
| Region                |                               |                   |                                |                   |                                |                   |
| Northeast             | Ref                           |                   | Ref                            |                   | Ref                            |                   |
| South                 | <b>-3.03 (-5.45, -0.60)</b>   | <b>0.0143</b>     | <b>-17.34 (-19.52, -15.16)</b> | <b>&lt;0.0001</b> | <b>-17.88 (-19.77, -15.99)</b> | <b>&lt;0.0001</b> |
| Midwest               | <b>-11.51 (-14.23, -8.78)</b> | <b>&lt;0.0001</b> | <b>-23.31 (-25.76, -20.86)</b> | <b>&lt;0.0001</b> | <b>-10.75 (-12.87, -8.62)</b>  | <b>&lt;0.0001</b> |
| West                  | <b>-9.95 (-13.62, -6.28)</b>  | <b>&lt;0.0001</b> | <b>-13.54 (-16.83, -10.24)</b> | <b>&lt;0.0001</b> | <b>-6.08 (-8.94, -3.22)</b>    | <b>&lt;0.0001</b> |
| California            | <b>-6.23 (-9.81, -2.66)</b>   | <b>0.0006</b>     | <b>43.90 (40.68, 47.13)</b>    | <b>&lt;0.0001</b> | <b>8.62 (5.83, 11.42)</b>      | <b>&lt;0.0001</b> |
| Calendar Year         | <b>-2.67 (-3.15, -2.18)</b>   | <b>&lt;0.0001</b> | <b>3.94 (3.50, 4.38)</b>       | <b>&lt;0.0001</b> | <b>0.70 (0.32, 1.08)</b>       | <b>0.0003</b>     |
| Number of diagnosis   | <b>9.07 (8.49, 9.65)</b>      | <b>&lt;0.0001</b> | <b>2.97 (2.44, 3.50)</b>       | <b>&lt;0.0001</b> | -0.28 (-0.75, 0.19)            | 0.2389            |
| Number of procedures  | <b>18.08 (17.56, 18.59)</b>   | <b>&lt;0.0001</b> | <b>19.95 (19.44, 20.47)</b>    | <b>&lt;0.0001</b> | <b>13.96 (13.51, 14.40)</b>    | <b>&lt;0.0001</b> |
| Charlson score        | <b>-0.85 (-1.37, -0.33)</b>   | <b>&lt;0.0015</b> | -0.36 (-0.84, 0.12)            | 0.1394            | 0.77 (0.35, 1.18)              | 0.0003            |
| LOS                   | N/A                           | N/A               | <b>8.55 (8.36, 8.74)</b>       | <b>&lt;0.0001</b> | <b>4.22 (4.08, 4.36)</b>       | <b>&lt;0.0001</b> |

\* Data in 2008 were excluded from multivariate analysis due to missing information on region.

† Hospital charge and cost were adjusted to the 2010 dollars using annual inflation rate of 3%.

‡ For categorical variable, this represents the predicted percentage of increase in outcome for one level of the predictor compared to the reference level, while holding all other variables constant; for continuous variable, this represents the predicted percentage of increase in outcome for each unit increase in that variable, while holding all other variables constant. A negative increase represents a decrease.

**Table 5.** Resource utilization for Medicare beneficiaries with CLD who sought outpatient care in 2005-2010 (median (IQR)).

|                                    | 2005                    | 2006                    | 2007                    | 2008                    | 2009                    | 2010                    | p      |
|------------------------------------|-------------------------|-------------------------|-------------------------|-------------------------|-------------------------|-------------------------|--------|
| Average number of claims per year  | 1.98 ± 2.68             | 2.01 ± 2.72             | 1.98 ± 2.62             | 1.97 ± 2.50             | 1.96 ± 2.47             | 1.96 ± 2.40             | 0.0569 |
| Average total payment, \$          | 151.2<br>(72.3-529.1)   | 163.9<br>(77.6-567.0)   | 167.0<br>(80.2-562.0)   | 154.5<br>(78.2-552.2)   | 159.0<br>(81.4-568.3)   | 158.5<br>(83.0-565.2)   | <.0001 |
| Average payment by patient, \$     | 45.5 (0.0-162.5)        | 41.2 (0.0-158.6)        | 40.5 (0.0-158.4)        | 38.6 (0.0-142.2)        | 37.6 (0.0-126.14)       | 36.6 (0.0-123.8)        | <.0001 |
| Average payment by Medicare, \$    | 113.7<br>(53.8-336.5)   | 122.5<br>(58.0-373.1)   | 124.4<br>(58.9-371.3)   | 117.3<br>(56.9-369.4)   | 120.9<br>(57.9-409.4)   | 120.3<br>(56.6-408.9)   | <.0001 |
| Average charge, \$                 | 725.3<br>(241.1-2371.9) | 787.6<br>(260.0-2624.4) | 823.9<br>(277.4-2784.0) | 803.3<br>(283.7-2716.2) | 848.7<br>(290.6-2886.4) | 885.8<br>(312.9-2952.5) | <.0001 |
| <u>Beneficiary-paid amounts, %</u> | 20.0 (0-41.7)           | 20.0 (0.0-37.2)         | 20.0 (0.0-37.2)         | 19.9 (0.0-35.4)         | 19.4 (0.0-29.1)         | 19.7 (0.0-29.7)         | <.0001 |
| Medicare's responsibility, %       | 78.6 (55.9-100)         | 79.1 (61.6-100)         | 79.3 (61.8-100)         | 79.9 (63.8-100)         | 80.0 (68.1-100)         | 80.0 (68.0-100)         | <.0001 |

**Table 6.** Independent predictors of outpatient spending for Medicare beneficiaries with CLD.

| Predictors                                     | Estimated costs increase, %<br>(95% CI) |
|------------------------------------------------|-----------------------------------------|
| Calendar year                                  | -1.56 (-2.00 - -1.12)                   |
| Age <65                                        | +68.76 (+49.80 - +90.12)                |
| Age 65-69                                      | +37.05 (+32.03 - +42.26)                |
| Age 70-74                                      | +32.88 (+27.87 - +38.08)                |
| Age 75-79                                      | +23.40 (+18.59 - +28.40)                |
| Age 80-84                                      | +16.68 (+11.82 - +21.75)                |
| Male                                           | +10.27 (+8.44 - +12.12)                 |
| Black                                          | +1.56 (-1.21 - +4.42)                   |
| Hispanic                                       | +15.35 (+9.55 - +21.45)                 |
| Asian                                          | +32.05 (+24.30 - +40.27)                |
| Disability                                     | -4.75 (-15.05 - +6.80)                  |
| ESRD                                           | +7.84 (+1.33 - +14.77)                  |
| Location: Midwest                              | -3.82 (-6.12 - -1.46)                   |
| Location: South w/o California                 | -2.25 (-4.46 - +0.02)                   |
| Location: West                                 | +10.48 (+6.94 - +14.14)                 |
| Location: California                           | +15.43 (+11.65 - +19.34)                |
| Average number of diagnoses per claim, per dx  | +29.31 (+28.64 - +29.98)                |
| Number of outpatient procedures, per procedure | +18.09 (+13.63 - +22.72)                |

† The increase is in comparison to the reference value. A negative increase represents a decrease.

Supplementary Table 1. Clinical characteristics of hospitalizations of Medicare beneficiaries for liver disease by discharge year

| Characteristics         | 2005-2010 | 2005  | 2006  | 2007  | 2009  | 2010  | P-value |
|-------------------------|-----------|-------|-------|-------|-------|-------|---------|
| No. of patients         | 14,774    | 2,852 | 2,959 | 3,071 | 2,938 | 2,954 |         |
| No. of hospitalizations | 20,943    | 4,020 | 4,120 | 4,333 | 4,168 | 4,302 |         |
| Age                     |           |       |       |       |       |       |         |
| <65                     | 38.84     | 36.59 | 36.84 | 39.74 | 39.59 | 41.21 | <0.0001 |
| 65-69                   | 17.88     | 16.27 | 16.46 | 18.28 | 18.93 | 19.32 | <0.0001 |
| 70-74                   | 14.99     | 15.82 | 16.65 | 14.12 | 15.28 | 13.20 | 0.0004  |
| 75-79                   | 11.56     | 14.00 | 13.30 | 11.40 | 9.79  | 9.46  | <0.0001 |
| 80-84                   | 9.29      | 9.70  | 9.49  | 9.69  | 8.95  | 8.62  | 0.0454  |
| 85 and over             | 7.45      | 7.61  | 7.26  | 6.76  | 7.46  | 8.18  | 0.2001  |
| Race                    |           |       |       |       |       |       |         |
| White                   | 80.00     | 80.80 | 81.33 | 79.62 | 79.80 | 78.54 | 0.0025  |
| Black                   | 10.71     | 10.50 | 9.85  | 11.08 | 10.68 | 11.41 | 0.0911  |
| Hispanic                | 4.61      | 4.30  | 4.47  | 4.52  | 4.53  | 5.20  | 0.0718  |
| Other                   | 4.67      | 4.40  | 4.34  | 4.78  | 4.99  | 4.83  | 0.1445  |
| Male gender             | 55.09     | 54.30 | 55.75 | 54.81 | 55.33 | 55.25 | 0.5655  |
| ESRD                    | 6.40      | 3.86  | 5.87  | 6.85  | 8.21  | 7.07  | <0.0001 |
| Discharge status        |           |       |       |       |       |       |         |
| Home                    | 51.90     | 52.69 | 54.49 | 52.87 | 50.31 | 49.26 | <0.0001 |
| Continued care          | 36.70     | 35.25 | 34.32 | 36.46 | 37.93 | 39.38 | <0.0001 |
| Hospice                 | 4.75      | 3.73  | 4.05  | 4.87  | 5.61  | 5.39  | <0.0001 |
| Died                    | 6.65      | 8.33  | 7.14  | 5.79  | 6.14  | 5.97  | <0.0001 |
| Region                  |           |       |       |       |       |       |         |
| Northeast               | 19.83     | 20.10 | 19.59 | 18.95 | 19.05 | 21.46 | 0.2126  |
| South                   | 40.58     | 40.95 | 40.29 | 41.45 | 39.88 | 40.33 | 0.4086  |
| Midwest                 | 22.28     | 22.66 | 23.59 | 21.79 | 23.37 | 20.11 | 0.0138  |
| West                    | 8.31      | 8.46  | 7.99  | 9.07  | 8.13  | 7.90  | 0.3719  |
| California              | 9.00      | 7.84  | 8.54  | 8.75  | 9.57  | 10.20 | <0.0001 |

\*Hospital charge and reimbursement were adjusted to the 2010 dollar using a coefficient of annual inflation of 3%.

**Supplementary table 2.** Demographics of Medicare beneficiaries with CLD who sought outpatient care in 2005-2010.

|                         | 2005   | 2006   | 2007   | 2008   | 2009   | 2010   | p      |
|-------------------------|--------|--------|--------|--------|--------|--------|--------|
| Number of patients      | 23,946 | 23,331 | 22,840 | 21,578 | 22,540 | 23,112 |        |
| Number of claims        | 47,460 | 46,871 | 45,307 | 42,408 | 44,167 | 45,339 |        |
| Age:                    |        |        |        |        |        |        |        |
| <65 years, %            | 30.95  | 31.02  | 32.41  | 33.56  | 34.29  | 34.71  | <.0001 |
| 65-69 years, %          | 21.57  | 21.44  | 21.26  | 21.13  | 21.64  | 21.69  | 0.6715 |
| 70-74 years, %          | 17.84  | 17.25  | 16.85  | 16.87  | 16.52  | 16.39  | 0.0003 |
| 75-79 years, %          | 14.44  | 14.11  | 13.83  | 12.64  | 12.26  | 12.40  | <.0001 |
| 80-84 years, %          | 9.19   | 9.86   | 9.37   | 9.30   | 8.78   | 8.58   | <.0001 |
| >=85 years, %           | 6.00   | 6.32   | 6.29   | 6.51   | 6.52   | 6.22   | 0.2088 |
| Male, %                 | 44.65  | 44.67  | 45.00  | 44.99  | 45.07  | 45.22  | 0.7866 |
| Race/ethnicity:         |        |        |        |        |        |        |        |
| White, %                | 82.00  | 82.55  | 81.98  | 77.83  | 80.78  | 80.54  | <.0001 |
| Black, %                | 10.15  | 9.72   | 10.19  | 12.58  | 10.94  | 11.07  | <.0001 |
| Other race, %           | 2.90   | 2.69   | 2.58   | 2.99   | 2.52   | 2.37   | 0.0092 |
| Asian, %                | 1.70   | 1.69   | 1.89   | 2.57   | 2.19   | 2.29   | <.0001 |
| Hispanic, %             | 2.57   | 2.68   | 2.63   | 2.71   | 2.75   | 2.94   | 0.2113 |
| Native American, %      | 0.69   | 0.67   | 0.73   | 1.32   | 0.82   | 0.79   | 0.0361 |
| Medicare eligibility:   |        |        |        |        |        |        |        |
| aged, %                 | 68.37  | 68.35  | 66.80  | 66.12  | 64.95  | 64.62  | <.0001 |
| aged+ESRD, %            | 0.68   | 0.63   | 0.80   | 0.73   | 0.76   | 0.67   | 0.2818 |
| disabled, %             | 29.11  | 29.21  | 30.52  | 31.31  | 32.42  | 32.96  | <.0001 |
| disabled+ESRD, %        | 1.04   | 1.06   | 1.17   | 1.08   | 1.11   | 1.08   | 0.8106 |
| ESRD, %                 | 0.80   | 0.74   | 0.71   | 0.77   | 0.75   | 0.67   | 0.6873 |
| Location:               |        |        |        |        |        |        |        |
| Northeast, %            | 20.64  | 20.47  | 20.42  | 19.74  | 20.94  | 20.89  | 0.5634 |
| Midwest, %              | 26.1   | 26.48  | 26.36  | 23.42  | 25.48  | 26.27  | 0.0256 |
| South w/o California, % | 35.28  | 35.53  | 34.96  | 34.82  | 34.95  | 34.34  | 0.1438 |
| West, %                 | 9.27   | 8.92   | 9.32   | 10.49  | 9.43   | 9.23   | 0.2413 |
| California, %           | 8.71   | 8.6    | 8.93   | 11.54  | 9.2    | 9.27   | 0.0006 |

STROBE 2007 (v4) Statement—Checklist of items that should be included in reports of *cohort studies*

| Section/Topic                | Item # | Recommendation                                                                                                                                                                       | Reported on page # |
|------------------------------|--------|--------------------------------------------------------------------------------------------------------------------------------------------------------------------------------------|--------------------|
| Title and abstract           | 1      | (a) Indicate the study's design with a commonly used term in the title or the abstract                                                                                               | 3                  |
|                              |        | (b) Provide in the abstract an informative and balanced summary of what was done and what was found                                                                                  | 3                  |
| <b>Introduction</b>          |        |                                                                                                                                                                                      |                    |
| Background/rationale         | 2      | Explain the scientific background and rationale for the investigation being reported                                                                                                 | 4                  |
| Objectives                   | 3      | State specific objectives, including any prespecified hypotheses                                                                                                                     | 4-5                |
| <b>Methods</b>               |        |                                                                                                                                                                                      |                    |
| Study design                 | 4      | Present key elements of study design early in the paper                                                                                                                              | 5                  |
| Setting                      | 5      | Describe the setting, locations, and relevant dates, including periods of recruitment, exposure, follow-up, and data collection                                                      | 5-9                |
| Participants                 | 6      | (a) Give the eligibility criteria, and the sources and methods of selection of participants. Describe methods of follow-up                                                           | 6-7                |
|                              |        | (b) For matched studies, give matching criteria and number of exposed and unexposed                                                                                                  | N/A                |
| Variables                    | 7      | Clearly define all outcomes, exposures, predictors, potential confounders, and effect modifiers. Give diagnostic criteria, if applicable                                             | 6-9                |
| Data sources/<br>measurement | 8*     | For each variable of interest, give sources of data and details of methods of assessment (measurement). Describe comparability of assessment methods if there is more than one group | 5-9                |
| Bias                         | 9      | Describe any efforts to address potential sources of bias                                                                                                                            | 9-10               |
| Study size                   | 10     | Explain how the study size was arrived at                                                                                                                                            | 6-9                |
| Quantitative variables       | 11     | Explain how quantitative variables were handled in the analyses. If applicable, describe which groupings were chosen and why                                                         | 7-8                |
| Statistical methods          | 12     | (a) Describe all statistical methods, including those used to control for confounding                                                                                                | 9-10               |
|                              |        | (b) Describe any methods used to examine subgroups and interactions                                                                                                                  | 9-10               |
|                              |        | (c) Explain how missing data were addressed                                                                                                                                          | 7                  |
|                              |        | (d) If applicable, explain how loss to follow-up was addressed                                                                                                                       | N/A                |
|                              |        | (e) Describe any sensitivity analyses                                                                                                                                                | N/A                |
| <b>Results</b>               |        |                                                                                                                                                                                      |                    |

|                          |     |                                                                                                                                                                                                              |       |
|--------------------------|-----|--------------------------------------------------------------------------------------------------------------------------------------------------------------------------------------------------------------|-------|
| Participants             | 13* | (a) Report numbers of individuals at each stage of study—eg numbers potentially eligible, examined for eligibility, confirmed eligible, included in the study, completing follow-up, and analysed            | 10    |
|                          |     | (b) Give reasons for non-participation at each stage                                                                                                                                                         | N/A   |
|                          |     | (c) Consider use of a flow diagram                                                                                                                                                                           | N/A   |
| Descriptive data         | 14* | (a) Give characteristics of study participants (eg demographic, clinical, social) and information on exposures and potential confounders                                                                     | 10-11 |
|                          |     | (b) Indicate number of participants with missing data for each variable of interest                                                                                                                          | N/A   |
|                          |     | (c) Summarise follow-up time (eg, average and total amount)                                                                                                                                                  | 10-11 |
| Outcome data             | 15* | Report numbers of outcome events or summary measures over time                                                                                                                                               | 10-12 |
| Main results             | 16  | (a) Give unadjusted estimates and, if applicable, confounder-adjusted estimates and their precision (eg, 95% confidence interval). Make clear which confounders were adjusted for and why they were included | 10-13 |
|                          |     | (b) Report category boundaries when continuous variables were categorized                                                                                                                                    | 10-12 |
|                          |     | (c) If relevant, consider translating estimates of relative risk into absolute risk for a meaningful time period                                                                                             | N/A   |
| Other analyses           | 17  | Report other analyses done—eg analyses of subgroups and interactions, and sensitivity analyses                                                                                                               | N/A   |
| <b>Discussion</b>        |     |                                                                                                                                                                                                              |       |
| Key results              | 18  | Summarise key results with reference to study objectives                                                                                                                                                     | 13-14 |
| <b>Limitations</b>       |     |                                                                                                                                                                                                              |       |
| Interpretation           | 20  | Give a cautious overall interpretation of results considering objectives, limitations, multiplicity of analyses, results from similar studies, and other relevant evidence                                   | 15-16 |
| Generalisability         | 21  | Discuss the generalisability (external validity) of the study results                                                                                                                                        | 15-16 |
| <b>Other information</b> |     |                                                                                                                                                                                                              |       |
| Funding                  | 22  | Give the source of funding and the role of the funders for the present study and, if applicable, for the original study on which the present article is based                                                | N/A   |

\*Give information separately for cases and controls in case-control studies and, if applicable, for exposed and unexposed groups in cohort and cross-sectional studies.

**Note:** An Explanation and Elaboration article discusses each checklist item and gives methodological background and published examples of transparent reporting. The STROBE checklist is best used in conjunction with this article (freely available on the Web sites of PLoS Medicine at <http://www.plosmedicine.org/>, Annals of Internal Medicine at <http://www.annals.org/>, and Epidemiology at <http://www.epidem.com/>). Information on the STROBE Initiative is available at [www.strobe-statement.org](http://www.strobe-statement.org).

# BMJ Open

## Clinical Outcomes and Resource Utilization in Medicare Patients with Chronic Liver Disease: A Historical Cohort Study

|                                 |                                                                                                                                                                                                                                                                                                                                                                                               |
|---------------------------------|-----------------------------------------------------------------------------------------------------------------------------------------------------------------------------------------------------------------------------------------------------------------------------------------------------------------------------------------------------------------------------------------------|
| Journal:                        | <i>BMJ Open</i>                                                                                                                                                                                                                                                                                                                                                                               |
| Manuscript ID:                  | bmjopen-2013-004318.R1                                                                                                                                                                                                                                                                                                                                                                        |
| Article Type:                   | Research                                                                                                                                                                                                                                                                                                                                                                                      |
| Date Submitted by the Author:   | 07-Apr-2014                                                                                                                                                                                                                                                                                                                                                                                   |
| Complete List of Authors:       | Younossi, Zobair; Inova Fairfax Hospital, Medicine and Beatty Center for Integrated Research<br>Zheng, Li; Inova Health Systems, Betty and Guy Beatty Center for Integrated Research<br>Stepanova, Maria; Inova Health Systems, Betty and Guy Beatty Center for Integrated Research<br>Venkatesan, Chapy; Inova Fairfax Hospital, Medicine<br>Mishra, Alita; Inova Fairfax Hospital, Medicine |
| <b>Primary Subject Heading</b>: | Health services research                                                                                                                                                                                                                                                                                                                                                                      |
| Secondary Subject Heading:      | Gastroenterology and hepatology                                                                                                                                                                                                                                                                                                                                                               |
| Keywords:                       | Hepatobiliary disease < GASTROENTEROLOGY, Hepatology < INTERNAL MEDICINE, QUALITATIVE RESEARCH                                                                                                                                                                                                                                                                                                |
|                                 |                                                                                                                                                                                                                                                                                                                                                                                               |

SCHOLARONE™  
Manuscripts

Only



1  
2  
3 **Clinical Outcomes and Resource Utilization in Medicare Patients with Chronic**  
4  
5 **Liver Disease: A Historical Cohort Study**  
6  
7

8  
9  
10 Zobair M. Younossi<sup>1,2</sup>, Li Zheng<sup>2</sup>, Maria Stepanova<sup>2</sup>, Chapy Venkatesan<sup>1</sup>, Alita Mishra<sup>1</sup>  
11

12 1. Department of Medicine, Inova Fairfax Hospital, Falls Church, VA, USA.  
13

14 2. Betty and Guy Beatty Center for Integrated Research, Inova Health System, Falls Church, VA,  
15  
16

17 USA  
18  
19  
20  
21

22 **Corresponding author and reprint requests:**

23 Zobair M. Younossi, M.D., M.P.H.

24 Betty and Guy Beatty Center for Integrated Research

25 Claude Moore Health Education and Research Building

26 3300 Gallows Road, Falls Church, VA 22042

27 PHONE: (703) 776-2540 FAX: (703) 776-4386, E-mail: zobair.younossi@inova.org  
28  
29

30 **Corresponding Author Statement:** The Corresponding Author has the right to grant on behalf  
31 of all authors and does grant on behalf of all authors, an exclusive license (or non exclusive for  
32 government employees) on a worldwide basis to the BMJ Publishing Group Ltd to permit this  
33 article (if accepted) to be published in BMJ editions and any other BMJ PGL products and  
34 sublicenses such use and exploit all subsidiary rights, as set out in our license.  
35  
36

37 **Transparency Declaration:** The lead author affirms that this study is a complete assessment of  
38 the data and no important information has been omitted.  
39  
40  
41

42 **Word count:** 3399 (excluding title, abstract, references and tables)

43 **Abstract:** 297

44 **Tables and figures:** 6  
45  
46  
47  
48  
49  
50  
51  
52  
53  
54  
55  
56  
57  
58  
59  
60

## ABSTRACT

**Objectives:** The aim of this study is to assess recent trends in health resource utilization and patient outcomes of Medicare beneficiaries with chronic liver disease (CLD).

**Setting:** Liver-related mortality is the tenth leading cause of death in the United States, and hepatitis C (HCV) and obesity-related non-alcoholic fatty liver disease (NAFLD) were the major causes of CLD. As the U.S. population ages and becomes more obese, the impact of CLD is expected to become more prominent for the Medicare population.

**Participants:** This is a retrospective cohort study of the Medicare beneficiaries with a diagnosis of CLD based on inpatient (N=21,576; 14,977 unique patients) and outpatient (N=515,990; 244,196 patients) claims from 2005 to 2010.

**Primary and secondary outcome measures:** The study outcomes included hospital length of stay (LOS) and inpatient mortality as well as inpatient and outpatient inflation-adjusted payments.

**Results:** Between 2005 and 2010, there was an annual decrease in LOS of 3.17% for CLD related hospitalizations. Risk-adjusted in-hospital mortality decreased (odds ratio (OR), 0.90, 95% confidence interval, 0.87-0.94), while short-term post-discharge mortality remained stable (1.00, 0.98-1.03). Inpatient per-claim payment increased from \$11,769 in 2005 to \$12,347 in 2010 ( $p=0.0006$ ). Similarly, average yearly payments for outpatient care increased from \$366 to \$404 ( $p<0.0001$ ). This change in payment was observed together with a consistent decrease in the proportion of beneficiary-paid amount (25.4% to 20.0%,  $p<0.0001$ ) as opposed to Medicare-paid amount (73.1% to 80.0%,  $p<0.0001$ ). The major predictors of higher outpatient payments were younger age, Asian race or Hispanic ethnicity, living in California, and having more diagnoses and outpatient procedures per claim. The predictors of inpatient spending also

1  
2  
3 included younger age, location, and the number of inpatient procedures. **Conclusions:** Length of  
4  
5 inpatient stay and inpatient mortality among Medicare beneficiaries with CLD decreases, while  
6  
7 both inpatient and outpatient spending increases.  
8  
9

### 10 11 12 **Strengths and limitations of this study:**

13  
14  
15 Strengths include:

- 16  
17 • First study assessing recent trend in health resource utilization by Medicare beneficiaries  
18  
19 with chronic liver disease.
- 20  
21 • Using a representative sample of the national Medicare population.
- 22  
23 • Include both inpatient and outpatient claims.
- 24  
25 • Identified demographic and clinical factors associated with resource utilization and short  
26  
27 term mortality.  
28  
29  
30  
31

32  
33 Limitations include:

- 34  
35 • Exact service dates were not available, making it impossible to conduct survival analysis  
36  
37 to account for variability in length of post-discharge follow-up.
- 38  
39 • Post-discharge mortality may be underestimated due to some un-validated death dates.
- 40  
41 • Unmeasured confounders may exist in a retrospective cohort study.
- 42  
43 • Could not determine whether patients sought care outside Medicare.  
44  
45  
46  
47  
48  
49  
50  
51  
52  
53  
54  
55  
56  
57  
58  
59  
60

## INTRODUCTION

Chronic liver disease (CLD) is a major cause of mortality and morbidity worldwide. [1,2,3,4,5]  
In the United States, liver-related mortality is the tenth leading cause of death with hepatitis C (HCV) and obesity-related non-alcoholic fatty liver disease (NAFLD) being the major causes of CLD [1-4,6-9].

Medicare is a U.S. national government-sponsored health insurance program that guarantees access to healthcare for the U.S. residents of 65 years of age or older, younger individuals with disabilities, those with end-stage renal disease (ESRD) or Lou Gehrig's disease. In addition to Medicare's payment, enrollees are responsible for a number of out-of-pocket payments including deductibles and coinsurance as well as payment for uncovered services; however, a supplemental insurance may be used to cover a certain proportion of the beneficiary-paid amount. In 2010, Medicare made up 23% of all personal healthcare spending in the United States [10].

In patients with chronic liver disease, age is known to be associated with adverse outcomes [7-8]. As the U.S. population ages and becomes more obese, the impact of CLD is expected to become more prominent for the Medicare population [6,9]. The cohort of baby boomers (Americans born between 1946 and 1964) also has a large proportion of HCV infection and is currently approaching the age of eligibility for Medicare, adding towards the growing burden of CLD. In this context, recent reports by The Institute of Medicine emphasized the need for a national prevention and control strategy for patients with viral hepatitis-associated CLD [4].

1  
2  
3 To date, Medicare resource utilization related to CLD has not been fully assessed. The recent  
4 healthcare reform legislation will be impacting what Medicare spends and how hospitals are  
5 reimbursed. The aim of this study was to assess recent trends in inpatient and outpatient  
6 Medicare spending related to CLD.  
7  
8  
9  
10  
11  
12  
13

## 14 15 **METHODS**

16  
17 *Data Source:* This is a retrospective cohort study of the Medicare claims. We analyzed Medicare  
18 inpatient and outpatient files from 2005-2010 submitted by outpatient and inpatient providers for  
19 reimbursement of treatment and facility costs. For each year, we obtained a 5% random sample  
20 of Medicare beneficiaries that were included in the Denominator Files provided to us by the  
21 Centers for Medicare & Medicaid Services (CMS) in the format of Limited Data Set (LDS)  
22 Standard Analytic Files. Each year, for the sampled beneficiaries, all inpatient and outpatient  
23 claims for the study years were included.  
24  
25  
26  
27  
28  
29  
30  
31  
32  
33  
34  
35

36 The inpatient file contains inpatient hospital encounters incurred during the study period. Each  
37 record represents a single hospital claim which includes a unique patient identifier, basic  
38 demographics, admission type and discharge status, International Classification of Diseases, 9th  
39 Revision, Clinical Modification (ICD-9-CM) diagnosis and procedure codes, other conditions  
40 related to the Medicare bill that include various claim-related information such as being  
41 homeless, unemployed, military, student, or over 100 years old, as well as hospital charges,  
42 Medicare reimbursement amount, and payment from the patient and another insurance.  
43  
44  
45  
46  
47  
48  
49  
50  
51  
52  
53  
54  
55  
56  
57  
58  
59  
60

1  
2  
3 In outpatient files, each record represents a single outpatient claim. Of the parameters used for  
4 the study, Medicare billing data included a unique patient identifier which was used to link data  
5 for each beneficiary across all Medicare files, the last day on the billing statement covered  
6 services rendered to the beneficiary, a list of up to 10 diagnoses and 6 outpatient ICD-9  
7 procedures, total facility charges, Medicare reimbursement amount and payments from patient  
8 and other insurance providers.  
9  
10  
11  
12  
13  
14  
15  
16

17  
18  
19  
20 The denominator file includes Medicare beneficiary enrollment, demographics (age, gender,  
21 ethnicity, the region of residence), and short-term mortality information. No data elements that  
22 might permit identification of beneficiaries were left in the CLD files.  
23  
24  
25  
26  
27  
28

29 We obtained institutional review board approval at Inova Fairfax Hospital, and signed a data-use  
30 agreement with the CMS.  
31  
32  
33  
34  
35

### 36 ***Study Population***

37  
38 The following ICD-9-CM codes were used to establish the diagnosis of chronic liver disease in  
39 both inpatient and outpatient claims: viral hepatitis (070.0, 070.1, 070.20-070.23, 070.30-070.33,  
40 070.41-070.44, 070.49, 070.51-070.54, 070.59, 070.6, 070.70, 070.71, 070.9), liver disorders of  
41 iron and copper metabolism (275.0, 275.01-275.03, 275.09, 275.1), esophageal varices with or  
42 without bleeding (456.0, 456.1, 456.20, 456.21), chronic liver disease and cirrhosis (571.0-571.3,  
43 571.40-571.42, 571.49, 571.5, 571.6, 571.8, 571.9), sequelae of chronic liver disease such as  
44 hepatic coma, portal hypertension, and hepatorenal syndrome (572.2-572.4, 572.8), other chronic  
45 disorders of liver and biliary tract (573.3, 573.5, 573.8, 576.1, 576.8), cholestatic jaundice  
46  
47  
48  
49  
50  
51  
52  
53  
54  
55  
56  
57  
58  
59  
60

1  
2  
3 (782.4), hepatomegaly (789.1), ascites (789.5), abnormal liver scan/function study (794.8), and  
4 indicators of CLD coded as factors and external causes (E947.9, V02.60, V02.61, V02.62,  
5 V02.69, V42.7). For inpatient visits, a claim was included in the study only if the principal  
6 diagnosis for that claim was CLD-related. Outpatient analysis included claims related CLD  
7 identified from either principle or secondary diagnoses.  
8  
9

10  
11  
12  
13  
14  
15  
16  
17 Patient baseline characteristics were derived from Medicare denominator file, which includes age  
18 categories at admission, gender, race/ethnicity, end stage renal disease (ESRD) status, residence  
19 (Northeast, South, Midwest, West, and California), discharge disposition type, continued care,  
20 hospice status, and inpatient death. Comorbidities scores were derived from up to 9 secondary  
21 diagnosis codes using Deyo-modification of the Charlson score developed for claims data  
22 analysis [11]. The total number of diagnoses and total number of procedures in each record were  
23 also included in the analysis (might exceed 10 diagnoses or 6 procedures that were given  
24 explicitly).  
25  
26  
27  
28  
29  
30  
31  
32  
33  
34  
35  
36  
37  
38

### 39 ***Inpatient Outcomes***

40  
41 Both resource utilization and short-term mortality outcomes were assessed. Resource utilization  
42 parameters included length of stay and total payments as well as the proportion of Medicare  
43 spending and of beneficiary-paid amount. Total payments for patient services in each claim were  
44 calculated as the sum of Medicare reimbursement amount, primary insurance payment,  
45 beneficiary-paid amounts (copay, deductibles and coinsurance). The annual percent changes of  
46 Consumer Price Indexes (CPI) for Medical care were used to adjust the annual payments, to the  
47 dollars of 2010.  
48  
49  
50  
51  
52  
53  
54  
55  
56  
57  
58  
59  
60

1  
2  
3 Length of stay (LOS) is defined as the number of full days a patient stays in the hospital. Since  
4 admission and discharge dates were not provided in the data, LOS was calculated as the total  
5 number of days of care in each claim, which included the number of days of care that are  
6 chargeable and the number of days of care that are not chargeable to Medicare facility utilization.  
7  
8 If a patient was admitted and discharged on the same day, LOS was counted as one day.  
9  
10 According to Medicare policy, patients need to pay certain amount of coinsurance for LOS over  
11 60 days, and no coinsurance for LOS 1-60 days. To remove the potential effect of coinsurance on  
12 LOS, cases with LOS over 60 days were dismissed from analysis.  
13  
14  
15  
16  
17  
18  
19  
20  
21  
22  
23

24 Short-term mortality outcomes were evaluated for each calendar year. In the case of multiple  
25 hospitalizations within a calendar year, the most recent claim was designated as the index event.  
26  
27 If a patient was hospitalized for CLD in multiple calendar years, he was counted as new patient  
28 for each year. In-hospital mortality was defined as an in-hospital record with discharge status of  
29 “Dead”, regardless of cause or LOS. Short-term post-discharge mortality was defined as a death  
30 from any cause after hospital discharge, after excluding patients who died in hospital. We  
31 determined short-term post-discharge mortality based on the death date recorded in the Medicare  
32 denominator file. The period of follow-up for short-term post-discharge mortality was the end of  
33 March of the year following patient’s index discharge.  
34  
35  
36  
37  
38  
39  
40  
41  
42  
43  
44  
45  
46  
47

### 48 ***Outpatient Outcomes***

49  
50 The resource utilization parameters included total payments, Medicare spending and the  
51 proportion of beneficiary-paid amount. Total per-claim payment was the sum of Medicare  
52 reimbursement amount, primary insurance payment, and the beneficiary-paid amount which  
53  
54  
55  
56  
57  
58  
59  
60



1  
2  
3 included all applicable co-payments, deductibles and coinsurance. If more than one outpatient  
4 claim was reported for a patient in a given year, then, for that patient in that year, the resource  
5 utilization parameters were added up, and the total yearly resource utilization, together with the  
6 average proportion of beneficiary-paid amount in percent of total payments, was calculated.  
7  
8  
9  
10  
11  
12  
13

### 14 *Statistical Analysis*

15  
16 We described the baseline characteristics of the study population by presenting frequencies for  
17 categorical variables and mean  $\pm$  SD for continuous variables. Mean LOS, hospital charge and  
18 total payments for each claim were calculated. Unadjusted rates of all-cause in-hospital mortality  
19 and post-discharge mortality were estimated. In both analyses, all available clinical and  
20 demographic parameters were compared across the study years to identify parameters that  
21 changed significantly over time, using chi-square test for binary or categorical parameters (age,  
22 gender, race, mortality, etc) and non-parametric Kruskal-Wallis Test for continuous parameters  
23 (length of stay, hospital charge, Charlson score, number of diagnosis, number of procedures).  
24  
25  
26  
27  
28  
29  
30  
31  
32  
33  
34  
35  
36  
37  
38

39 Multivariable regression analyses were run to assess the independent association of inpatient and  
40 outpatient resource utilization and patients' clinico-demographics characteristics that were used  
41 as potential predictors. LOS and total payments were found to be skewed to the right in a non-  
42 normal distribution and therefore were analyzed using generalized linear model (GLM) with a  
43 gamma error distribution and a log-link function. The adjusted relationship between predictors  
44 and resource utilization were estimated using beta coefficients from these models, which were  
45 exponentiated to yield a percentage change in the outcomes associated with each predictor. .  
46  
47  
48  
49  
50  
51  
52  
53  
54  
55  
56  
57  
58  
59  
60

1  
2  
3  
4  
5  
6  
7  
8  
9  
10  
11  
12  
13  
14  
15  
16  
17  
18  
19  
20  
21  
22  
23  
24  
25  
26  
27  
28  
29  
30  
31  
32  
33  
34  
35  
36  
37  
38  
39  
40  
41  
42  
43  
44  
45  
46  
47  
48  
49  
50  
51  
52  
53  
54  
55  
56  
57  
58  
59  
60

Multivariate logistic regression analysis was performed on in-hospital mortality and short-term post-discharge mortality. The association between a mortality predictor and an outcome was analyzed with the  $\chi^2$  test, which was used to compare the risk-adjusted rate of mortality among those with and those without the risk factor. Odds ratio was used to estimate the adjusted association between each predictor and mortality. Significance tests and confidence intervals (CIs) were based on a two-sided 95% confidence level.

## RESULTS

### *Demographics and outcomes for inpatients with CLD (Table 1 and 2, Supplementary Table 1)*

The analysis included 21,576 hospitalizations with a principal diagnosis of CLD during 2005-2010 for a total of 14,977 patients. The annual number of claims ranged from minimum of 3,475 in 2008 to maximum of 3,698 in 2005. The annual percent of re-hospitalizations was about 23%. The most common primary diagnoses were hepatic encephalopathy (25.10%), non-alcoholic cirrhosis of liver (18.01%), alcoholic cirrhosis of liver (15.16%), and sclerosing cholangitis (6.17%).

During the study period, the observed in-hospital mortality decreased from 11.81% to 8.38% ( $p < 0.001$ ), post-discharge mortality decreased from 36.37% to 33.82% ( $p = 0.0099$ ), the average number of diagnoses per claim increased from 7.92 to 8.64 ( $p < 0.001$ ), and Charlson score increased (1.31 to 1.36;  $p < 0.001$ ). The proportion of patients discharged to home decreased, while the proportion discharged to hospice or continued care increased.

1  
2  
3 The number of admissions, diagnoses and procedures and male gender were independently  
4 associated with increased risk for in-hospital mortality. Independent predictors of short-term  
5 post-discharge mortality were discharge disposition, number of admissions, Charlson score,  
6 gender and LOS during hospitalization. Age appeared to be a stronger predictor of post-  
7 discharge mortality than in-hospital mortality. The adjusted in-hospital mortality rate decreased  
8 between 2005 and 2010, while the adjusted post-discharge mortality rate remained stable.  
9 Furthermore, there were regional and racial variations in post-discharge mortality using the  
10 standard reference categories (Table 3).  
11  
12  
13  
14  
15  
16  
17  
18  
19  
20  
21  
22  
23

#### 24 *Inpatient spending for Medicare beneficiaries with CLD*

25  
26 The proportion of CLD-related inpatient spending in the total inpatient spending for Medicare  
27 beneficiaries increased from 7.70% in 2005 to 8.84% in 2008 and decreased to 7.66% in 2010.  
28 Total payments increased from \$11,769 to \$12,347 per claim ( $p < 0.001$ ), average LOS  
29 decreased from 6.02 days to 5.74 days ( $p < 0.001$ ). Independent predictors of increases in LOS  
30 included black or Hispanic race/ethnicity, number of diagnoses and procedures, died in hospital  
31 or disposition other than to home. . Independent predictors of increases in total payments were  
32 similar. The adjusted total payments also increased with LOS and across the study years (Table  
33 4).  
34  
35  
36  
37  
38  
39  
40  
41  
42  
43  
44  
45  
46  
47

#### 48 *Demographics and outcomes for outpatients with CLD (Table 1, Supplementary Table 2):*

49  
50 A total of 515,990 CLD-related outpatient claims for 244,196 unique Medicare beneficiaries  
51 with CLD were included for the study period. Of those, 42.5% were the claims with CLD as a  
52 primary diagnosis.  
53  
54  
55  
56  
57  
58  
59  
60

1  
2  
3  
4  
5  
6 The number of patients with at least one CLD claim ranged from the minimum of 38,485 in 2008  
7  
8 to the maximum of 44,546 in 2010, representing approximately 770,000-890,000 Medicare  
9  
10 beneficiaries with CLD nationwide. The most prevalent CLD diagnosis on outpatient claims was  
11  
12 non-alcoholic cirrhosis of liver (ICD-9 code 571.5) that was present on 14.0% outpatient claims  
13  
14 in patients with CLD. The most prevalent primary diagnoses on claims where CLD was a  
15  
16 secondary diagnosis were abdominal pain (789.00), type II diabetes mellitus without mention of  
17  
18 complication (250.00), and end-stage renal disease (585.6) each present 3.3% of claims with  
19  
20 CLD.  
21  
22  
23  
24  
25  
26

27 Similarly to the inpatient population, the proportion of patients who were less than 65 years old  
28  
29 increased from 30.5% in 2005 to 34.3% in 2010 ( $p<0.0001$ ). Ethnic profile of a Medicare  
30  
31 beneficiary with CLD also shifted towards a lower proportion of Caucasians: from 81.94% to  
32  
33 80.58% ( $p<0.0001$ ). The proportion of patients living in the South region also slightly increased,  
34  
35 while the gender distribution of Medicare beneficiaries with CLD did not change with 45.8%-  
36  
37 46.5% of patients being male (Table 1).  
38  
39  
40  
41  
42

#### 43 *Outpatient spending for Medicare beneficiaries with CLD (Table 5 and Table 6)*

44  
45 The proportion of total outpatient spending for claims with CLD in the total outpatient spending  
46  
47 for Medicare beneficiaries decreased from 1.38% in 2005 to 1.34% in 2010. The average number  
48  
49 of claims per patient per year did not change during the study period remaining at the level of  
50  
51 approximately 2.10-2.12 claims per year ( $p=0.56$ ). Per-patient yearly total payment as well as  
52  
53 yearly payment by Medicare and the proportion of Medicare's responsibility all increased over  
54  
55  
56  
57  
58  
59  
60

1  
2  
3 time (all  $p < 0.0001$ ). At the same time, the average payment by a patient and the proportion of a  
4  
5 beneficiary-paid amount decreased between 2005 and 2010 (both  $p < 0.001$ ) (Table 5).  
6  
7

8  
9  
10 In multivariate analysis, total payments have been found to be decreasing over the study period  
11  
12 by -1.66% (95% CI = -1.98% to -1.34%) per calendar year. The average number of diagnoses per  
13  
14 claim and the number of outpatient procedures per year were both independently associated with  
15  
16 total payments (Table 6). However, after ESRD, being in the youngest age group (less than 65  
17  
18 years old) was the most important predictor of payments (+50.2% (+46.3-54.3%)), likely due to  
19  
20 the disability-related Medicare eligibility requirements for such patients. Also, there were racial  
21  
22 and geographic variations in payments; in particular, being Asian or Hispanic were independent  
23  
24 predictors of higher total payments in comparison to the reference Caucasians, while being  
25  
26 African-American was associated with lower payments (Table 6). Finally, the reference  
27  
28 Northeast location was associated with the lowest payments in comparison to all other locations  
29  
30 (Table 6).  
31  
32  
33  
34  
35  
36  
37  
38

### 39 **DISCUSSION**

40  
41 This is the first study to report inpatient and outpatient clinical outcomes and Medicare resource  
42  
43 utilization for patients with CLD. The majority of CLD primary diagnoses on inpatient claims  
44  
45 were hepatic encephalopathy and cirrhosis. Interestingly, the Medicare population with ESRD  
46  
47 and younger than 65 are becoming a larger portion of this cohort, Although the observed increase  
48  
49 in the number of diagnoses per claim and Charlson index may be due to the CLD population  
50  
51 becoming more complex with more comorbidities and related conditions, prior reports suggest  
52  
53 that such changes might also be explained by the documentation and coding practices [12].  
54  
55  
56  
57  
58  
59  
60

1  
2  
3  
4  
5  
6 The risk-adjusted analysis showed that both in-hospital mortality and length of stay decreased.  
7  
8 The potential reasons for a decrease in inpatient mortality include improvements in quality,  
9  
10 efficiency of care delivery and increasing use of hospice services [13, 14] while the decrease in  
11  
12 the length of stay may also be due to changes in payment arrangements and discharge practices.  
13  
14 In fact, it is possible the recent focus on “hospital efficiency” has moved a number of CLD  
15  
16 patients who were previously cared for in the inpatient setting, to the outpatient arena. This may  
17  
18 have resulted in a decrease in inpatient LOS or even mortality but an increase in disease severity  
19  
20 in the outpatient setting.  
21  
22  
23  
24  
25  
26

27 After adjusting for inflation, total payments to hospitals for inpatient services significantly  
28  
29 increased. As expected, independent predictors of payments and LOS were similar. Of note,  
30  
31 minorities experienced higher payments and LOS and could be another target for better  
32  
33 allocation of resources. The fact that discharges to extended care facilities and inpatient deaths  
34  
35 were associated with higher inpatient resource utilization is consistent with the notion that  
36  
37 patients who are at highest risk for mortality consume the greatest portion of the health care  
38  
39 resources [15,16]. It has been previously reported that Hispanic patients with CLD (especially  
40  
41 NAFLD) are at higher risk for adverse outcome such as cirrhosis and HCC which this study also  
42  
43 corroborates as Hispanic ethnicity is independently associated with resource utilization [6,9].  
44  
45  
46  
47  
48  
49

50 In the outpatient Medicare population, chronic hepatitis C cirrhosis, abnormal liver imaging, and  
51  
52 NAFLD were the most common CLD diagnoses with approximately half of claims with the  
53  
54 diagnosis of CLD had one listed as a primary diagnosis. Once again, the proportion of patients  
55  
56  
57  
58  
59  
60

1  
2  
3 younger than 65 years old and disability eligible increased. As payments from Medicare and  
4 proportion of Medicare's responsibility increased, the beneficiary-paid amount decreased. Racial  
5 and geographic variations in payment were again observed. Our study also showed that younger  
6 age was the most important independent predictor of Medicare spending. This is consistent with  
7 the fact that younger patients with CLD who qualify for Medicare can only be enrolled due to  
8 their disability or other chronic condition such as ESRD [17,18]. Furthermore, we expect that the  
9 rate of patients with HCV will continue to increase as a result of the CDC's current guidelines  
10 which recommend screening all patients ages 45-65 regardless of risk factors for hepatitis C [19].  
11 The HCV screening will help to identify cases earlier and with the new more effective  
12 treatments, these treatments can possibly lead to a cure, which may, over time, lead to a  
13 substantial decrease in the number of patients with advanced liver disease [20,21,22].  
14  
15  
16  
17  
18  
19  
20  
21  
22  
23  
24  
25  
26  
27  
28  
29  
30  
31

32 There were some limitations to our study. The exact dates were not available for the year 2005-  
33 2009, making it impossible to assess the exact timing of post-discharge outcomes. Second, we  
34 may have under-estimated post-discharge mortality. This may be due to the LDS denominator  
35 files for each calendar year are based on information known to CMS in March of the year  
36 following hospitalizations so that some patients without date of death may have been dead but  
37 treated as alive. However, 96% of death dates were validated suggesting that the impact of the  
38 "un-validated death date" on mortality can be small. The restricted mortality data we had access  
39 to did not allow to account for variability in the length of post-discharge follow-up in a survival  
40 analysis. Because this was a retrospective cohort study, there were unmeasured confounders for  
41 which we could not adjust for, such as the availability of healthcare providers in patient's place  
42 of residence, history of other chronic diseases and major interventions, marital and  
43  
44  
45  
46  
47  
48  
49  
50  
51  
52  
53  
54  
55  
56  
57  
58  
59  
60

1  
2  
3 socioeconomic status, history of substance abuse or psychiatric conditions, metabolic disorders,  
4  
5 as well as the results of physical examination and physical activity which may be especially  
6  
7 important for appreciating health status of the elderly population. We also could not determine  
8  
9 whether patients sought care outside their Medicare plan which potentially may have changed  
10  
11 outcomes [23].  
12  
13

14  
15  
16  
17 In conclusion, CLD is a common disease entity with important patient and financial outcomes  
18  
19 for the Medicare population. Although in-hospital mortality and LOS are decreasing, mortality  
20  
21 after discharge remains stable. Also, both inpatient and outpatient spending by Medicare is [24].  
22  
23 Independent demographic and clinical predictors which we identified for payment and clinical  
24  
25 outcomes can be used to target resource allocation for prevention. This last point is especially  
26  
27 important as the Affordable Care Act (ACA) has begun, ensuring insurance coverage is available  
28  
29 to all and patients with pre-existing conditions are not excluded nor do they suffer from lapse in  
30  
31 coverage [25]. It will be imperative to track the impact of the ACA on the long-term outcomes of  
32  
33 patients living with CLD especially when one reviews the patients most likely to have CLD are  
34  
35 also the patients most likely to be uninsured. Hispanics are the second most prevalent group to be  
36  
37 uninsured, especially the young Hispanic male who is working [26]. In this study, younger  
38  
39 Hispanic males were more likely to have CLD than any other group. Therefore, efforts should be  
40  
41 directed to ensure this group becomes knowledgeable about the importance and availability of  
42  
43 insurance as well as healthy living. Finally, the results are pertinent as the cohort of baby  
44  
45 boomers are increasingly eligible for Medicare. Furthermore, the epidemic of obesity will  
46  
47 continue to fuel the increasing prevalence of NAFLD and related cirrhosis. As the population of  
48  
49 patients with HCV and NAFLD become increasingly eligible for Medicare, the future burden of  
50  
51  
52  
53  
54  
55  
56  
57  
58  
59  
60



1  
2  
3  
4  
5  
6  
7  
8  
9  
10  
11  
12  
13  
14  
15  
16  
17  
18  
19  
20  
21  
22  
23  
24  
25  
26  
27  
28  
29  
30  
31  
32  
33  
34  
35  
36  
37  
38  
39  
40  
41  
42  
43  
44  
45  
46  
47  
48  
49  
50  
51  
52  
53  
54  
55  
56  
57  
58  
59  
60

CLD on Medicare, the most important source of health care insurance coverage in the U.S. will become even more important.

For peer review only

1  
2  
3 **Funding Source:** Internal funds only.  
4

5 **Contributorship Statement:** All authors made substantive intellectual contributions to this  
6 manuscript and their roles are defined at end of manuscript.  
7

8  
9 **Conflict of Interest:** There are no conflicts of interest for any of the authors.  
10

11 **Data Sharing Statement:** Our data source, Medicare, does not allow sharing of data.  
12  
13

## 14 15 16 **REFERENCES** 17

- 18 1. Gravitz L. Introduction: a smouldering public-health crisis. *Nature* 2011;474(7350):S2–4.
- 19 2. Chak E, Tala AH, Sherman KE, et al. Hepatitis C virus infection in the USA: an estimate of  
20 true prevalence. *Liver Int.* 2011;31:1090-1101.  
21
- 22 3. Ly KN, Xing J, Klevens RM, et al. The increasing burden of mortality from viral hepatitis in  
23 the United States between 1999 and 2007. *Ann Intern Med.* 2012 Feb 21;156(4):271-8.  
24
- 25 4. Institute of Medicine. Hepatitis and Liver Cancer: A National Strategy for Prevention and  
26 Control of Hepatitis B and C. Washington, DC: The National Academies Press;2010.  
27
- 28 5. Thomas DL, Seeff LB. Natural history of hepatitis C. *Clin Liver Dis.* 2005;9:383-98, vi.  
29
- 30 6. Lazo M, Hernaez R, Bonekamp S et al. Non-alcoholic fatty liver disease and mortality among  
31 US adults: prospective cohort study. *BMJ.* 2011 Nov 18;343:d6891.  
32
- 33 7. Pradat P, Voirin N, Tillmann HL, et al. Progression to cirrhosis in hepatitis C patients: an age-  
34 dependent process. *Liver Int.* 2007;27(3):335–9.  
35
- 36 8. Singer ME, Younossi ZM. Cost-effectiveness of screening for hepatitis C virus in  
37 asymptomatic, average risk adults: has the time come? *Am. J. Med.* 2001;111:614-621.  
38
- 39 9. Koebnick C, Getahun D, Reynolds K, et al. Trends in nonalcoholic fatty liver disease-related  
40 hospitalizations in US children, adolescents, and young adults. *J Pediatr Gastroenterol Nutr.*  
41 2009 May;48(5):597-603. doi: 10.1097/MPG.0b013e318192d224.  
42  
43  
44  
45  
46  
47  
48  
49  
50  
51  
52  
53  
54  
55  
56  
57  
58  
59  
60

- 1  
2  
3 10. Health Care Spending and the Medicare Program. Published by Medicare Payment Advisory  
4 Commission, Washington DC. June 2012.  
5  
6  
7  
8 11. Deyo RA, Cherkin DC, Ciol MA. Adapting a clinical comorbidity index for use with *ICD-9-*  
9 *CM* administrative databases. *J Clin Epidemiol* 1992;45 (6) 613- 61  
10  
11  
12 12. Lindenauer PK, Lagu T, Shieh MS, et al. Association of diagnostic coding with trends in  
13 hospitalizations and mortality of patients with pneumonia, 2003-2009. *JAMA*. 2012 Apr  
14 4;307(13):1405-13.  
15  
16  
17 13. Yong-Fang K, Goodwin J. Impact of Hospitalists on Length of Stay in the Medicare  
18 Population: Variation by Hospital and Patient Characteristics. *J Am Geriatr Soc*. 2010; 58(9):  
19 1649–1657.  
20  
21  
22 14. Newhouse JP, Garber AM. Geographic Variation in Medicare Services. *N Engl J Med* 2013.  
23 368(16): 1465-1468.  
24  
25  
26 15. Pyenson B, Fitch K, Iwasaki K. Consequences of Hepatitis C Virus (HCV): Costs of a Baby  
27 Boomer Epidemic of Liver Disease. New York, NY: Milliman, Inc; May 18, 2009. [Internet,  
28 cited 2013 Mar 12]. Available from: [http://publications.milliman.com/research/health-](http://publications.milliman.com/research/health-rr/pdfs/consequences-hepatitis-c-virus-RR05-18-09.pdf)  
29 [rr/pdfs/consequences-hepatitis-c-virus-RR05-18-09.pdf](http://publications.milliman.com/research/health-rr/pdfs/consequences-hepatitis-c-virus-RR05-18-09.pdf)  
30  
31  
32 16. Wong JB, McQuillan GM, McHutchison JG et al. Estimating future hepatitis C morbidity,  
33 mortality, and costs in the United States. *Am J Public Health* 2000;90(10):1562–9.  
34  
35  
36 17. Coughlin TA, Waidmann TA, Phadera L. Among dual eligibles, identifying the highest-cost  
37 individuals could help in crafting more targeted and effective responses. *Health Aff (Millwood)*.  
38 2012 May;31(5):1083-91. doi: 10.1377/hlthaff.2011.0729. Epub 2012 Apr 18.  
39  
40  
41  
42  
43  
44  
45  
46  
47  
48  
49  
50  
51  
52  
53  
54  
55  
56  
57  
58  
59  
60

- 1  
2  
3  
4  
5  
6  
7  
8  
9  
10  
11  
12  
13  
14  
15  
16  
17  
18  
19  
20  
21  
22  
23  
24  
25  
26  
27  
28  
29  
30  
31  
32  
33  
34  
35  
36  
37  
38  
39  
40  
41  
42  
43  
44  
45  
46  
47  
48  
49  
50  
51  
52  
53  
54  
55  
56  
57  
58  
59  
60
18. Bubolz T, Emerson C, Skinner J. State spending on dual eligibles under age 65 shows variations, evidence of cost shifting from Medicaid to Medicare. *Health Aff (Millwood)*. 2012 May;31(5):939-47. doi: 10.1377/hlthaff.2011.0921.
19. Centers for Disease Control. Testing recommendations for chronic Hepatitis C. Obtained from the world wide web at: <http://www.cd.gov/Hepatitis/guidelinsC.htm>. Last accessed on 3 April 2014.
20. Deuffic-Burban S, Mathurin P, Rosa I, et al. Impact of emerging hepatitis C treatment on future needs for liver transplantation *Dig Liver Dis*. 2014 Feb;46(2):157-63. doi: 10.1016/j.dld.2013.08.137. Epub 2013 Oct 10.
21. Lawitz E, Mangia A, Wyles D, et al. [Sofosbuvir for previously untreated chronic hepatitis C infection](#). *EJ. N Engl J Med*. 2013 May 16;368(20):1878-87. doi: 10.1056/NEJMoa1214853. Epub 2013 Apr 23.
22. Jacobson IM, Gordon SC, Kowdley KV, et al. ; POSITRON Study; FUSION Study. [Sofosbuvir for hepatitis C genotype 2 or 3 in patients without treatment options](#). *N Engl J Med*. 2013 May 16;368(20):1867-77. doi: 10.1056/NEJMoa1214854. Epub 2013 Apr 23.
23. Quan et al. Coding algorithms for defining comorbidities in ICD-9-CM and ICD-10 administrative data. *Med Care* 2005 Nov; 43(11):1073-1077.
24. Younossi ZM, Stepanova M, Mishra A, et al. The impact of chronic hepatitis C on resource utilization and in-patient mortality for Medicare beneficiaries between 2005 and 2010. *AP&T*. 2013 Aug. doi:10.1111/apt.12485
25. Medicare Payment Advisory Group. Medicare and Health Care Spending. June 2012. Obtained from the world wide web at:

1  
2  
3 <http://www.medpac.gov/documents/Jun12DataBookEntireReport.pdf>. Last accessed on 8 Oct  
4  
5 2013.

6  
7  
8 26. Centers for Medicare and Medicaid Services. Audience Segmentation for the Emerging  
9  
10 Health Care Marketplace. March 22, 2013. Obtained from the world wide web at  
11  
12 <http://www.marketplace.cms.gov>. Last accessed on 8 Oct 2013.  
13  
14

15  
16  
17  
18  
19  
20  
21  
22  
23  
24  
25  
26  
27  
28  
29  
30  
31  
32  
33  
34  
35  
36  
37  
38  
39  
40  
41  
42  
43  
44  
45  
46  
47  
48  
49  
50  
51  
52  
53  
54  
55  
56  
57  
58  
59  
60

For peer review only

**Table 1.** Clinico-demographic characteristics of Medicare beneficiaries who sought inpatient and outpatient care in 2005-2010.

| Characteristics                   | Inpatient     |               |        | Outpatient  |             |        |
|-----------------------------------|---------------|---------------|--------|-------------|-------------|--------|
|                                   | 2005          | 2010          | p*     | 2005        | 2010        | p*     |
| No. of patients                   | 2,582         | 2,458         |        | 39,885      | 44,546      |        |
| No. of claims                     | 3,698         | 3,680         |        | 83,866      | 94,309      |        |
| Percent of re-hospitalizations, % | 24.20         | 25.83         | 0.0653 | NA          | NA          |        |
| Number of diagnoses               | 7.92 +/- 1.73 | 8.64 +/- 1.31 | <.0001 | 3.55 ± 2.11 | 4.32 ± 2.39 | <.0001 |
| Number of procedures              | 1.59 +/- 1.75 | 1.67 +/- 1.79 | 0.2554 | 0.01 ± 0.16 | 0.01 ± 0.18 | NS     |
| Charlson score                    | 1.31 +/- 1.58 | 1.36 +/- 1.67 | <.0001 | 1.25 ± 1.46 | 1.43 ± 1.50 | <.0001 |
| Age                               |               |               |        |             |             |        |
| <65, %                            | 38.18         | 42.47         | <.0001 | 30.48       | 34.33       | <.0001 |
| 65-69, %                          | 15.87         | 19.62         | <.0001 | 20.65       | 21.46       | 0.0055 |
| 70-74, %                          | 16.01         | 12.64         | <.0001 | 17.66       | 16.52       | 0.0006 |
| 75-79, %                          | 13.28         | 8.89          | <.0001 | 15.03       | 12.35       | <.0001 |
| 80-84, %                          | 9.19          | 8.40          | 0.0166 | 9.70        | 8.88        | <.0001 |
| 85 and over, %                    | 7.46          | 7.99          | 0.1107 | 6.49        | 6.47        | NS     |
| Race                              |               |               |        |             |             |        |
| White, %                          | 81.18         | 79.24         | 0.0162 | 81.85       | 80.58       | <.0001 |
| Black, %                          | 10.25         | 10.84         | 0.2218 | 10.68       | 11.71       | <.0001 |
| Hispanic, %                       | 4.57          | 5.33          | 0.1124 | 2.48        | 2.70        | NS     |
| Other, %                          | 4.00          | 4.59          | 0.0428 | 2.71        | 2.09        | <.0001 |
| Male gender, %                    | 53.95         | 54.35         | 0.0836 | 45.75       | 46.04       | NS     |
| End-stage renal disease, %        | 3.49          | 6.11          | <.0001 | 3.48        | 3.52        | NS     |
| Discharge status                  |               |               |        |             |             |        |
| Home, %                           | 52.52         | 49.57         | <.0001 | NA          | NA          | NA     |
| Continued care, %                 | 36.78         | 39.78         | <.0001 | NA          | NA          | NA     |
| Hospice, %                        | 4.25          | 5.08          | <.0001 | NA          | NA          | NA     |
| Died, %                           | 6.46          | 5.57          | <.0001 | NA          | NA          | NA     |
| Region                            |               |               |        |             |             |        |
| Northeast, %                      | 16.88         | 21.17         | 0.1323 | 19.96       | 19.25       | 0.0045 |
| South, %                          | 34.86         | 39.44         | <.0001 | 26.26       | 25.45       | 0.0002 |
| Midwest, %                        | 18.85         | 23.25         | 0.0044 | 36.50       | 37.69       | 0.0007 |
| West, %                           | 7.23          | 8.31          | 0.0025 | 8.98        | 8.83        | NS     |
| California, %                     | 7.77          | 9.49          | <.0001 | 8.29        | 8.78        | <.0001 |

NA - not applicable

\* p-value indicates the significance of change over the study years; NS - not significant

**Table 2.** Resource utilization and mortality outcomes for Medicare beneficiaries with CLD who sought inpatient care in 2005-2010.

|                                          | 2005                     | 2006                     | 2007                     | 2008                     | 2009                     | 2010                     | p      |
|------------------------------------------|--------------------------|--------------------------|--------------------------|--------------------------|--------------------------|--------------------------|--------|
| Length of stay, days                     | 6.02 +/- 5.61            | 5.92 +/- 5.65            | 5.86 +/- 5.40            | 5.78 +/- 5.54            | 5.61 +/- 5.45            | 5.74 +/- 5.57            | 0.0001 |
| Mean (SD)                                | 4 (3, 7)                 | 4 (3, 7)                 | 4 (3, 7)                 | 4 (3, 7)                 | 4 (2, 7)                 | 4 (3, 7)                 |        |
| Median(IQR)                              |                          |                          |                          |                          |                          |                          |        |
| Payment by patient, \$                   | 650 +/- 782              | 649 +/- 695              | 650 +/- 762              | 661 +/- 796              | 661 +/- 802              | 626 +/- 758              | <.0001 |
| Mean +/- SD                              |                          |                          |                          |                          |                          |                          |        |
| Median(IQR)                              | 1,096 (0-1,096)          | 1,100 (0-1,100)          | 1,098 (0-1,098)          | 1,093 (0-1,093)          | 1,104 (0-1,104)          | 1,100 (0-1,100)          |        |
| Payment by patient, %                    | 7.70 +/- 9.20            | 7.64 +/- 8.77            | 8.54 +/- 12.67           | 8.84 +/- 13.33           | 8.18 +/- 10.16           | 7.66 +/- 9.48            | 0.0507 |
| Mean +/- SD                              |                          |                          |                          |                          |                          |                          |        |
| Median(IQR)                              | 7.66 (0-13.36)           | 7.55 (0-13.38)           | 7.32 (0-13.59)           | 7.38 (0-13.71)           | 6.20 (0-13.80)           | 4.38 (0-12.75)           |        |
| Payment by Medicare, \$                  | 10,542 +/- 14,023        | 10,435 +/- 13,085        | 9,817 +/- 11,768         | 10,159 +/- 14,975        | 9,956 +/- 12,547         | 10,765 +/- 13,779        | <.0001 |
| Mean +/- SD                              |                          |                          |                          |                          |                          |                          |        |
| Median(IQR)                              | 7,952<br>(6,581- 9,962)  | 7,909<br>(6,568- 9,938)  | 7,667<br>(6,268- 9,638)  | 7,743<br>(5,749- 10,129) | 7,789<br>(4,996- 10,572) | 8,482<br>(5,194- 11,326) |        |
| Payment by Medicare, %                   | 89.52 +/- 17.71          | 89.88 +/- 16.90          | 87.65 +/- 21.65          | 87.20 +/- 22.28          | 88.10 +/- 20.23          | 89.04 +/- 19.16          | 0.0011 |
| Mean +/- SD                              |                          |                          |                          |                          |                          |                          |        |
| Median(IQR)                              | 91.29<br>(86.34- 100.00) | 91.41<br>(86.26- 100.00) | 91.01<br>(85.79- 100.00) | 91.18<br>(85.10- 100.00) | 92.29<br>(84.21- 100.00) | 93.75<br>(85.12- 100.00) |        |
| Total payment, \$ of 2010                | 11,769 +/- 15,864        | 11,623 +/- 14,745        | 11,652 +/- 25,393        | 11,711 +/- 18,912        | 11,916 +/- 16,045        | 12,347 +/- 17,641        | 0.0006 |
| Mean +/- SD                              |                          |                          |                          |                          |                          |                          |        |
| Median(IQR)                              | 8,596<br>(7,485-10,748)  | 85,22<br>(7,448-10,516)  | 8,382<br>(7,187-10,486)  | 8,584<br>(6,623-11,013)  | 9,173<br>(5,985-11,779)  | 9,478<br>(5,932-12,192)  |        |
| In-hospital mortality rate, %            | 8.38                     | 8.89                     | 8.14                     | 8.71                     | 9.86                     | 11.81                    | <.0001 |
| Short-term post-discharge mortality, % * | 36.37                    | 34.21                    | 34.12                    | 35.00                    | 30.91                    | 33.82                    | 0.0099 |

\*Patients were followed up to March of the year following the hospitalization.

**Table 3.** Predictors of in-hospital mortality and overall post-discharge mortality in Medicare beneficiaries hospitalized for CLD in 2005-2010.\*

| Predictors            | In-hospital Mortality<br>OR (95% CI) | Post-discharge Mortality**<br>OR (95% CI) |
|-----------------------|--------------------------------------|-------------------------------------------|
| Age                   |                                      |                                           |
| 65-69                 | Ref                                  | Ref                                       |
| <65                   | 0.83 (0.69, 0.99)                    | 0.83 (0.72, 0.94)                         |
| 70-74                 | 1.06 (0.85, 1.31)                    | 1.16 (0.99, 1.35)                         |
| 75-79                 | 1.28 (1.03, 1.60)                    | 1.33 (1.13, 1.56)                         |
| 80-84                 | 0.91 (0.71, 1.18)                    | 1.23 (1.04, 1.46)                         |
| 85 and over           | 0.92 (0.70, 1.21)                    | 1.51 (1.27, 1.80)                         |
| Gender                |                                      |                                           |
| Female                | Ref                                  | Ref                                       |
| Male                  | 1.27 (1.11, 1.44)                    | 1.34 (1.22, 1.46)                         |
| Race                  |                                      |                                           |
| White                 | Ref                                  | Ref                                       |
| Black                 | 1.18 (0.96, 1.44)                    | 0.81 (0.70, 0.95)                         |
| Hispanic              | 0.74 (0.52, 1.04)                    | 0.91 (0.73, 1.13)                         |
| Other                 | 1.11 (0.82, 1.51)                    | 0.79 (0.63, 0.99)                         |
| ESRD                  |                                      |                                           |
| No                    | Ref                                  | Ref                                       |
| Yes                   | 0.73 (0.55, 0.98)                    | 1.14 (0.93, 1.40)                         |
| Number of admissions  |                                      |                                           |
| 1                     | Ref                                  | Ref                                       |
| ≥2                    | 1.50 (1.31, 1.73)                    | 1.62 (1.46, 1.80)                         |
| Discharge destination |                                      |                                           |
| Home                  | N/A                                  | Ref                                       |
| Continued care        | N/A                                  | 2.51 (2.29, 2.76)                         |
| Hospice               | N/A                                  | 44.98 (33.01, 61.28)                      |
| Region                |                                      |                                           |
| Northeast             | Ref                                  | Ref                                       |
| South                 | 0.95 (0.81, 1.13)                    | 1.27 (1.12, 1.43)                         |
| Midwest               | 0.79 (0.65, 0.96)                    | 1.10 (0.96, 1.26)                         |
| West                  | 0.84 (0.65, 1.10)                    | 1.33 (1.11, 1.60)                         |
| California            | 0.95 (0.74, 1.22)                    | 1.23 (1.02, 1.47)                         |
| Calendar Year         | 0.90 (0.87, 0.94)                    | 1.00 (0.98, 1.03)                         |
| Number of diagnosis   | 1.24 (1.17, 1.32)                    | 1.06 (1.03, 1.09)                         |
| Number of procedures  | 1.36 (1.31, 1.41)                    | 0.98 (0.96, 1.01)                         |
| Charlson score        | 1.01 (0.98, 1.05)                    | 1.24 (1.21, 1.28)                         |
| LOS                   | 1.01 (1.00, 1.02)                    | 1.02 (1.01, 1.03)                         |

\* Data in 2008 were excluded from analysis due to missing information on patient's residence region.

\*\* Patients were followed up to March of the year following the hospitalization



**Table 4.** Predictors of LOS, hospital charge and total payment of hospitalizations of Medicare beneficiaries for CLD in 2005-2010\*.

| Predictors            | LOS Increase<br>% (95% CI) | Total Payment Increase<br>% (95% CI) |
|-----------------------|----------------------------|--------------------------------------|
| Age                   |                            |                                      |
| 65-69                 | Ref                        | Ref                                  |
| <65                   | -0.77 (-3.45, 1.90)        | -2.00 (-4.44, 0.43)                  |
| 70-74                 | -3.44 (-6.72, -0.16)       | -5.23 (-8.22, -2.24)                 |
| 75-79                 | -0.16 (-3.73, 3.41)        | -3.94 (-7.20, -0.69)                 |
| 80-84                 | 1.03 (-2.83, 4.89)         | -3.21 (-6.73, 0.31)                  |
| 85 and over           | -0.77 (-3.45, 1.90)        | -0.37(-4.16, 3.42)                   |
| Gender                |                            |                                      |
| Female                | Ref                        | Ref                                  |
| Male                  | -4.63 (-6.53, -2.72)       | 1.11 (-0.63, 2.85)                   |
| Race                  |                            |                                      |
| White                 | Ref                        | Ref                                  |
| Black                 | 9.57 (6.42, 12.73)         | 4.82 (1.94, 7.70)                    |
| Hispanic              | 11.36 (6.92, 15.80)        | 12.67 (8.62, 16.71)                  |
| Other                 | 1.90 (-2.76, 6.55)         | 1.58 (-2.66, 5.82)                   |
| ESRD                  |                            |                                      |
| No                    | Ref                        | Ref                                  |
| Yes                   | 2.23 (-2.19, 6.65)         | -5.86 (-9.90, -1.82)                 |
| Discharge destination |                            |                                      |
| Home                  | Ref                        | Ref                                  |
| Continued care        | 35.39 (33.31, 37.46)       | 0.53 (-1.39, 2.45)                   |
| Hospice               | 37.42 (32.67, 42.17)       | -1.42 (-5.77, 2.94)                  |
| Died                  | 25.95 (21.96, 29.94)       | 8.07 (4.44, 1.69)                    |
| Region                |                            |                                      |
| Northeast             | Ref                        | Ref                                  |
| South                 | -4.36 (-6.94, -1.79)       | -16.68 (-19.03, -14.33)              |
| Midwest               | -12.18 (-15.08, -9.28)     | -23.40 (-26.05, -20.75)              |
| West                  | -13.82 (-17.71, -9.94)     | -12.59 (-16.12, -9.05)               |
| California            | -9.23 (-13.02, -5.44)      | 42.62 ( 39.16, 46.08)                |
| Calendar Year         | -3.17 (-3.68, -2.66)       | 3.08 (2.61, 3.54)                    |
| Number of diagnosis   | 9.34 (8.70, 9.98)          | 3.72 (3.13, 4.30)                    |
| Number of procedures  | 17.70 (17.15, 18.25)       | 19.51 (18.95, 20.07)                 |
| Charlson score        | -1.36 (-1.96, -0.77)       | -0.47 (-1.01, 0.08)                  |
| LOS                   | N/A                        | 9.02 (8.80, 9.24)                    |

\* Data in 2008 were excluded from multivariate analysis due to missing information on region.

**Table 5.** Resource utilization for Medicare beneficiaries with CLD who sought outpatient care in 2005-2010 (median (IQR)).

|                                                     | 2005                   | 2006                   | 2007                   | 2008                   | 2009                   | 2010                   | p       |
|-----------------------------------------------------|------------------------|------------------------|------------------------|------------------------|------------------------|------------------------|---------|
| Yearly number of claims per patient (mean $\pm$ SD) | 2.10 +/- 2.92          | 2.11 +/- 2.94          | 2.11 +/- 2.94          | 2.12 +/- 3.02          | 2.12 +/- 2.91          | 2.12 +/- 2.85          | <0.0001 |
| Total yearly payment, \$                            | 366.2<br>(111.9-888.1) | 387.5<br>(113.8-901.6) | 397.1<br>(114.7-903.0) | 386.2<br>(113.3-924.3) | 408.8<br>(117.8-940.8) | 404.0<br>(119.5-929.7) | <.0001  |
| Yearly payment by patient, \$                       | 104.8<br>(10.9-307.7)  | 108.1<br>(13.0-277.3)  | 111.2<br>(15.5-271.7)  | 104.0<br>(16.0-256.2)  | 98.9<br>(20.3-204.4)   | 95.5<br>(22.0-202.2)   | <.0001  |
| Yearly payment by patient, %                        | 25.4<br>(3.7-44.2)     | 24.5<br>(7.0-38.4)     | 24.8<br>(9.5-38.3)     | 22.8<br>(8.9-36.2)     | 20.0<br>(10.5-27.5)    | 20.0<br>(11.6-27.4)    | <.0001  |
| Yearly payment by Medicare, \$                      | 237.1<br>(78.4-554.9)  | 260.7<br>(83.6-592.7)  | 266.9<br>(85.6-604.0)  | 263.9<br>(83.8-629.4)  | 299.5<br>(89.4-695.0)  | 300.00<br>(90.6-684.7) | <.0001  |
| Yearly payment by Medicare, %                       | 73.1<br>(55.0-92.7)    | 74.2<br>(61.1-90.2)    | 74.1<br>(61.4-88.2)    | 75.9<br>(63.8-88.4)    | 80.0<br>(70.4-87.3)    | 80.0<br>(70.7-86.6)    | <.0001  |

**Table 6.** Independent predictors of outpatient spending for Medicare beneficiaries with CLD.

| Predictors                                         | Payment increase, % (95% CI) † |
|----------------------------------------------------|--------------------------------|
| Calendar year                                      | -1.66 (-1.98 - -1.34)          |
| Age <65                                            | +50.24 (+46.30 - +54.27)       |
| Age 65-69                                          | +33.89 (+30.27 - +37.62)       |
| Age 70-74                                          | +29.15 (+25.57 - +32.83)       |
| Age 75-79                                          | +22.80 (+19.29 - +26.41)       |
| Age 80-84                                          | +13.86 (+10.39 - +17.44)       |
| Age 85+                                            | Reference                      |
| Male                                               | +3.75 (+2.48 - +5.04)          |
| Caucasian                                          | Reference                      |
| Black                                              | -5.21 (-7.10 - -3.29)          |
| Hispanic                                           | +8.74 (+4.55 - +13.10)         |
| Asian                                              | +12.22 (+7.19 - +17.49)        |
| ESRD                                               | +120.67 (+113.32 - +128.27)    |
| Location: Northeast                                | Reference                      |
| Location: Midwest                                  | +8.56 (+6.60 - +10.56)         |
| Location: South                                    | +6.18 (+4.38 - +8.00)          |
| Location: West                                     | +20.99 (+18.04 - +24.01)       |
| Location: California                               | +9.07 (+6.34 - +11.86)         |
| The number of diagnoses per claim, per dx          | +25.45 (+25.11 - +25.80)       |
| The number of outpatient procedures, per procedure | +31.04 (+26.60 - +35.64)       |

† The increase is in comparison to the reference value. A negative increase represents a decrease.

1  
2  
3  
4  
5  
6  
7  
8  
9 **Clinical Outcomes and Resource Utilization in Chronic Liver Disease – a Temporal Trends**  
10  
11 **Study of Medicare Population**  
12

13  
14 Zobair M. Younossi<sup>1,2</sup>, Li Zheng<sup>2</sup>, Maria Stepanova<sup>2</sup>, Chapy Venkatesan<sup>1</sup>, Alita Mishra<sup>1</sup>  
15

16 1. Department of Medicine, Inova Fairfax Hospital, Falls Church, VA, USA.  
17

18 2. Betty and Guy Beatty Center for Integrated Research, Inova Health System, Falls Church, VA,  
19  
20 USA  
21

22  
23  
24  
25  
26 **Corresponding author and reprint requests:**

27 Zobair M. Younossi, M.D., M.P.H.

28 Betty and Guy Beatty Center for Integrated Research  
29 Claude Moore Health Education and Research Building  
30 3300 Gallows Road, Falls Church, VA 22042

31 PHONE: (703) 776-2540 FAX: (703) 776-4386, E-mail: zobair.younossi@inova.org  
32

33 **Conflict of Interest:** There are no conflicts of interest for any of the authors.  
34

35 **Corresponding Author Statement:** The Corresponding Author has the right to grant on behalf  
36 of all authors and does grant on behalf of all authors, an exclusive license (or non exclusive for  
37 government employees) on a worldwide basis to the BMJ Publishing Group Ltd to permit this  
38 article (if accepted) to be published in BMJ editions and any other BMJ PGL products and  
39 sublicenses such use and exploit all subsidiary rights, as set out in our license.  
40

41 **Transparency Declaration:** The lead author affirms that this study is a complete assessment of  
42 the data and no important information has been omitted.  
43

44 **Funding Source:** Internal funds only.  
45

46 **Word count:** 3399 (excluding title, abstract, references and tables)

47 **Abstract:** 243297

48 **Tables and figures:** 6  
49  
50  
51  
52  
53  
54  
55  
56  
57  
58  
59  
60

Formatted: Line spacing: single

Formatted: Line spacing: single

Formatted: Highlight

Formatted: Font: Bold

## ABSTRACT

**Objectives:** The aim of this study is to assess recent trends in health resource utilization and patient outcomes of Medicare beneficiaries with chronic liver disease (CLD). **Setting:** Liver-related mortality is the tenth leading cause of death in the United States, and hepatitis C (HCV) and obesity-related non-alcoholic fatty liver disease (NAFLD) were the major causes of CLD. As the U.S. population ages and becomes more obese, the impact of CLD is expected to become more prominent for the Medicare population. **Participants:** This is a retrospective cohort study of the Medicare beneficiaries with a diagnosis of CLD based on inpatient (N=21,576; 14,977 unique patients) and outpatient (N=515,990; 244,196 patients) claims from 2005 to 2010. **Primary and secondary outcomes measures:** -The study outcomes included hospital length of stay (LOS) and inpatient mortality as well as inpatient and outpatient inflation-adjusted payments. **Results:** Between 2005 and 2010, there was an annual decrease in LOS of 3.17% for CLD related hospitalizations. Risk-adjusted in-hospital mortality decreased (odds ratio (OR), 0.90, 95% confidence interval, 0.87-0.94), while short-term post-discharge mortality remained stable (1.00, 0.98-1.03). Inpatient per-claim payment increased from \$11,769 in 2005 to \$12,347 in 2010 (p=0.0006). Similarly, average yearly payments for outpatient care increased from \$366 to \$404 (p<0.0001). This change in payment was observed together with a consistent decrease in the proportion of beneficiary-paid amount (25.4% to 20.0%, p<0.0001) as opposed to Medicare-paid amount (73.1% to 80.0%, p<0.0001). The major predictors of higher outpatient payments were younger age, Asian race or Hispanic ethnicity, living in California, and having more diagnoses; and outpatient procedures per claim. The predictors of inpatient spending also included younger age, location, and the number of inpatient procedures. **Conclusions:** Length of

1  
2  
3  
4  
5  
6  
7  
8  
9 inpatient stay and inpatient mortality among Medicare beneficiaries with CLD decreases<sup>s,d</sup> while  
10 both inpatient and outpatient spending increases<sup>s</sup>.  
11  
12  
13

#### 14 **Strengths and limitations of this study:**

15  
16 Strengths include:

- 17 • First study assessing recent trend in health resource utilization by Medicare beneficiaries  
18 with chronic liver disease.
- 19 • Using a representative sample of the national Medicare population.
- 20 • Include both inpatient and outpatient claims.
- 21 • Identified demographic and clinical factors associated with resource utilization and short  
22 term mortality.
- 23 •
- 24 •
- 25 •
- 26 •
- 27 •
- 28 •
- 29 •

30 Limitations include:

- 31 • Exact service dates were not available, making it impossible to conduct survival analysis  
32 to account for variability in length of post-discharge follow-up.
- 33 • Post-discharge mortality may be underestimated due to some un-validated death dates.
- 34 • Unmeasured confounders may exist in a retrospective cohort study.
- 35 •
- 36 •
- 37 •
- 38 •
- 39 • Could not determine whether patients sought care outside Medicare.
- 40 •
- 41 •
- 42 •
- 43 •
- 44 •
- 45 •
- 46 •
- 47 •
- 48 •
- 49 •
- 50 •
- 51 •
- 52 •
- 53 •
- 54 •
- 55 •
- 56 •
- 57 •
- 58 •
- 59 •
- 60 •

1  
2  
3  
4  
5  
6  
7  
8  
9  
10  
11  
12  
13  
14  
15  
16  
17  
18  
19  
20  
21  
22  
23  
24  
25  
26  
27  
28  
29  
30  
31  
32  
33  
34  
35  
36  
37  
38  
39  
40  
41  
42  
43  
44  
45  
46  
47  
48  
49  
50  
51  
52  
53  
54  
55  
56  
57  
58  
59  
60

## INTRODUCTION

Chronic liver disease (CLD) is a major cause of mortality and morbidity worldwide. [1,2,3,4,5]  
In the United States, liver-related mortality is the tenth leading cause of death with hepatitis C  
(HCV) and obesity-related non-alcoholic fatty liver disease (NAFLD) being the major causes of  
CLD [1-4,6-9].

~~In patients with chronic liver disease, age is known to be associated with adverse outcomes  
[7,8,10]. As the U.S. population ages and becomes more obese, the impact of CLD is expected to  
become more prominent [6,9]. Thus, in the United States, this trend is becoming especially  
important for the Medicare population. In this context, recent reports by The Institute of  
Medicine emphasized the need for a national prevention and control strategy for patients with  
chronic hepatitis [4].~~

Medicare is a U.S. national government-sponsored health insurance program that guarantees  
access to healthcare for the U.S. residents of 65 years of age or older, younger individuals with  
disabilities, those with end-stage renal disease (ESRD) or Lou Gehrig's disease. ~~In Medicare,  
inpatient hospital care is covered under Part A and outpatient medical services are covered under  
Part B.~~ In addition to Medicare's payment, enrollees are responsible for a number of out-of-  
pocket payments including deductibles and coinsurance as well as payment for uncovered  
services ~~such as long-term, dental, hearing, and vision care~~; however, a supplemental insurance  
may be used to cover a certain proportion of the beneficiary-paid amount. In 2010, Medicare  
made up 23% of all personal healthcare spending in the United States [10].

1  
2  
3  
4  
5  
6  
7  
8  
9 In patients with chronic liver disease, age is known to be associated with adverse outcomes [7-8].  
10 As the U.S. population ages and becomes more obese, the impact of CLD is expected to become  
11 more prominent for the Medicare population [6,9]. The cohort of baby boomers (Americans born  
12 between 1946 and 1964) also has a large proportion of HCV infection and is currently  
13 approaching the age of eligibility for Medicare, adding towards the growing burden of CLD. In  
14 this context, recent reports by The Institute of Medicine emphasized the need for a national  
15 prevention and control strategy for patients with viral hepatitis-associated CLD [4].  
16  
17  
18  
19  
20  
21  
22  
23

24 -To date, Medicare resource utilization related to CLD has not been fully assessed. The recent  
25 healthcare reform legislation will be impacting what Medicare spends and how hospitals are  
26 reimbursed. The aim of this study was to assess ~~the~~ recent trends in inpatient and outpatient  
27 Medicare spending related to CLD.  
28  
29  
30  
31

## 32 33 **METHODS**

34  
35 **Data Source:** This is a retrospective cohort study of the Medicare claims. We analyzed Medicare  
36 inpatient and outpatient files from 2005-2010 submitted by outpatient and inpatient providers for  
37 reimbursement of treatment and facility costs. For each year, we obtained a 5% random sample  
38 of Medicare beneficiaries that were included in the Denominator Files ~~provided to us by~~ from the  
39 Centers for Medicare & Medicaid Services (CMS) in the format of Limited Data Set (LDS)  
40 Standard Analytic Files. ~~For Each year, for~~ the sampled beneficiaries, all inpatient and outpatient  
41 claims for ~~all the~~ study years were included. ~~This study was provided exempt status by our~~  
42 ~~Internal Review Board.~~  
43  
44  
45  
46  
47  
48  
49  
50  
51  
52  
53  
54



1  
2  
3  
4  
5  
6  
7  
8  
9  
10  
11  
12  
13  
14  
15  
16  
17  
18  
19  
20  
21  
22  
23  
24  
25  
26  
27  
28  
29  
30  
31  
32  
33  
34  
35  
36  
37  
38  
39  
40  
41  
42  
43  
44  
45  
46  
47  
48  
49  
50  
51  
52  
53  
54  
55  
56  
57  
58  
59  
60

The inpatient file contains inpatient hospital encounters incurred during the study period. Each record represents a single hospital claim which includes a unique patient identifier, basic demographics, admission type and discharge status, International Classification of Diseases, 9th Revision, Clinical Modification (ICD-9-CM) diagnosis and procedure codes, other conditions related to the Medicare bill that include various claim-related information such as being homeless, unemployed, military, student, or over 100 years old, as well as hospital charges, Medicare reimbursement amount, and payment from the patient and another insurance.

In outpatient files, each record represents a unique-single outpatient claim. Of the parameters used for the study, Medicare billing data included a unique patient identifier which was used to link data for each beneficiary across all Medicare files, ~~(the last day on the billing statement covered services rendered to the beneficiary, a list of up to 10 diagnoses and 6 outpatient ICD-9 procedures, total facility charges, Medicare reimbursement amount and payments from patient and other insurance providers).~~

~~Finally,~~ ~~t~~he denominator file includes Medicare beneficiary enrollment, demographics (age, gender, ethnicity, the region of residence), and short-term mortality information. No data elements that might permit identification of beneficiaries were left in the CLD files.

-We obtained institutional review board approval at Inova Fairfax Hospital, and signed a data-use agreement with the CMS.

### *Study Population*

1  
2  
3  
4  
5  
6  
7  
8  
9 The following ICD-9-CM codes were used to establish the diagnosis of chronic liver disease in  
10 both inpatient and outpatient claims: viral hepatitis (070.0, 070.1, 070.20-070.23, 070.30-070.33,  
11 070.41-070.44, 070.49, 070.51-070.54, 070.59, 070.6, 070.70, 070.71, 070.9), ~~primary liver~~  
12 ~~cancer (155.0)~~, liver disorders of iron and copper metabolism (275.0, 275.01-275.03, 275.09,  
13 275.1), esophageal varices with or without bleeding (456.0, 456.1, 456.20, 456.21), ~~peritonitis~~  
14 ~~(567.2)~~, chronic liver disease and cirrhosis (571.0-571.3, 571.40-571.42, 571.49, 571.5, 571.6,  
15 571.8, 571.9), sequelae of chronic liver disease such as hepatic coma, portal hypertension, and  
16 hepatorenal syndrome (572.2-572.4, 572.8), other chronic disorders of liver and biliary tract  
17 (573.3, 573.5, 573.8, 576.1, 576.8), ~~pruritis (698.9)~~, cholestatic jaundice (782.4), hepatomegaly  
18 (789.1), ascites (789.5), ~~nonspecific abnormal serum enzyme levels (790.4-790.5)~~, abnormal  
19 liver scan/function study (794.8), and indicators of CLD coded as factors and external causes  
20 (E947.9, V02.60, V02.61, V02.62, V02.69, V42.7). For inpatient visits, a claim was included  
21 in the study only if the principal diagnosis for that claim was CLD-related. Outpatient analysis  
22 included claims related CLD identified from either principle or secondary diagnoses.  
23 A patient might have had more than one claim per year. In such case, claims with the principal  
24 diagnosis other than CLD were not included even if that patient had established diagnosis of  
25 CLD according to other claims. As a result, only CLD related spending was evaluated.

26  
27  
28  
29  
30  
31  
32  
33  
34  
35  
36  
37  
38  
39  
40  
41  
42 Patient baseline characteristics were derived from Medicare denominator file, which includes age  
43 categories at admission, gender, race/ethnicity, end stage renal disease (ESRD) status, residence  
44 (Northeast, South, Midwest, West, and California), discharge disposition type, continued care,  
45 hospice status, and inpatient death. Comorbidities scores were derived from up to 9 secondary  
46 diagnosis codes using Deyo-modification of the Charlson score developed for claims data  
47 analysis [11]. The total number of diagnoses and total number of procedures in each record were  
48  
49  
50  
51  
52  
53  
54

1  
2  
3  
4  
5  
6  
7  
8  
9 also included in the analysis (might exceed 10 diagnoses or 6 procedures that were given  
10 explicitly). ~~Claims with missing data on any of the study variables were excluded from analysis.~~

### 16 *Inpatient Outcomes*

18 Both resource utilization and short-term mortality outcomes were assessed. Resource utilization  
19 parameters included length of stay (LOS), ~~hospital charges~~ and total payments as well as the  
20 proportion of Medicare spending and the proportion of beneficiary-paid amount. ~~Total payments~~  
21 for patient services in each claim were calculated as the sum of Medicare reimbursement  
22 amount, primary insurance payment, beneficiary-paid amounts (copay, deductibles and  
23 coinsurance). ~~The annual percent changes of Consumer Price Indexes (CPI) for Medical care~~  
24 were used to adjust the annual payments, to the dollars of 2010.

33 Length of stay (LOS) is defined as the number of full days a patient stays in the hospital.

35 Since admission and discharge dates were not provided in the data, LOS was calculated as the  
36 total number of days of care in each claim, which included the number of days of care that are  
37 chargeable and the number of days of care that are not chargeable to Medicare facility utilization.

39 If a patient was admitted and discharged on the same day, LOS was counted as one day.

41 According to Medicare policy, patients need to pay certain amount of coinsurance for LOS over  
42 60 days, and no coinsurance for LOS 1-60 days. To remove the potential effect of coinsurance on

44 LOS, cases with LOS over 60 days were dismissed from analysis. ~~Total payments for patient~~  
45 ~~services in each claim were~~ as calculated as the sum of Medicare reimbursement amount, primary  
46 insurance payment, beneficiary paid amounts (copay, deductibles and coinsurance). ~~Since the~~

1  
2  
3  
4  
5  
6  
7  
8  
9 rates that Medicare pays for covered services are negotiated at the beginning of each year by the  
10 government agency, the annual percent changes of Consumer Price Indexes (CPI) for Medical  
11 care historic average of 3% were used selected as an annual coefficient of inflation to for  
12 adjustment of the annual payments, hospital charges and total payments to the dollars of 2010 f  
13 ]. The unit of analysis was the encounter for LOS, hospital charge and total payments.  
14  
15  
16  
17  
18  
19

20  
21  
22 Mortality-Short-term mortality outcomes were evaluated for each calendar year. In the case of  
23 multiple hospitalizations within a calendar year, the most recent claim was designated as the  
24 index event. If a patient was hospitalized for CLD in multiple calendar years, he was counted as  
25 new patient for each year. In-hospital mortality was defined as an in-hospital record with  
26 discharge status of “Dead”, regardless of cause or LOS. Short-term pPost-discharge mortality  
27 was defined as a death from any cause after hospital discharge, after excluding patients who died  
28 in hospital. The period of follow up for post discharge mortality was the end of March of the  
29 year following patient’s index discharge. We determined short-term post-discharge mortality  
30 based on the death date recorded in the Medicare denominator file. The period of follow-up for  
31 short-term post-discharge mortality was the end of March of the year following patient’s index  
32 discharge.  
33  
34  
35  
36  
37  
38  
39  
40  
41  
42  
43  
44

#### 45 ***Outpatient Outcomes***

46 Major-The resource utilization parameters including total charges, total payments, Medicare  
47 spending and the proportion of beneficiary-paid amount were calculated. Total per-claim  
48 payment was the sum of Medicare reimbursement amount, primary insurance payment, and the  
49  
50  
51  
52  
53  
54

1  
2  
3  
4  
5  
6  
7  
8  
9  
10  
11  
12  
13  
14  
15  
16  
17  
18  
19  
20  
21  
22  
23  
24  
25  
26  
27  
28  
29  
30  
31  
32  
33  
34  
35  
36  
37  
38  
39  
40  
41  
42  
43  
44  
45  
46  
47  
48  
49  
50  
51  
52  
53  
54  
55  
56  
57  
58  
59  
60

beneficiary-paid amount which included all applicable co-payments, deductibles and coinsurance. If more than one ~~inpatient or~~ outpatient claim was reported for a patient in a given year, then, for that patient in that year, the resource utilization parameters were added up, and the total yearly resource utilization, together with the average proportion of beneficiary-paid amount in percent of total payments, ~~were~~was calculated.

### *Statistical Analysis*

We described the baseline characteristics of the study population by presenting frequencies for categorical variables and mean  $\pm$  SD for continuous variables. Mean LOS, hospital charge and total payments for each claim were calculated. Unadjusted rates of all-cause in-hospital mortality and post-discharge mortality were estimated. In both analyses, all available clinical and demographic parameters were compared across the study years to identify parameters that changed significantly over time, using chi-square test for binary or categorical parameters (age, gender, race, mortality, etc) and non-parametric Kruskal-Wallis Test for continuous parameters (length of stay, hospital charge, Charlson score, number of diagnosis, number of procedures).

Multivariable regression analyses were ~~run~~used to assess the independent associations of ~~inpatient and outpatient resource utilization and patients' clinico-demographics characteristics that were used as potential predictors with resource utilization.~~ LOS, ~~provider or hospital charge,~~ and total payments were found to be skewed to the right in a non-normal distribution and therefore were analyzed using generalized linear model (GLM) with a gamma error distribution and a log-link function. ~~Association between a risk factor and the outcome was analyzed with the independent sample t test, which was used to compare the means of outcome for those with and~~

1  
2  
3  
4  
5  
6  
7  
8  
9 ~~those without the risk factor.~~ The adjusted relationship between ~~risk factors~~predictors and ~~each~~  
10 ~~outcome~~resource utilization were estimated using beta coefficients from these models, which  
11 were exponentiated to yield a percentage change in the outcomes associated with each ~~risk~~  
12 ~~factor~~predictor. ~~Initially, all available demographic parameters, location and resource utilization~~  
13 ~~were tested in the multiple regression model as potential predictors for the outcomes, but then~~  
14 ~~only predictors with p values of 0.05 or less were left.~~

20  
21  
22 Multivariate logistic regression analysis was performed on in-hospital mortality and short-term  
23 post-discharge mortality ~~to determine the independent effect of factors known to influence~~  
24 ~~prognosis~~. The association between a ~~risk factor~~mortality predictor and ~~death an outcome~~ was  
25 analyzed with the  $\chi^2$  test, which was used to compare the risk-adjusted rate of mortality among  
26 those with and those without the risk factor. Odds ratio was used to estimate the adjusted  
27 association between each predictor and mortality. Significance tests and confidence intervals  
28 (CIs) were based on a two-sided 95% confidence level. ~~Differences were considered significant~~  
29 ~~at the  $P < .05$  level~~

## 38 RESULTS

39 *Demographics and outcomes for inpatients with CLD (Table 1 and 2, Supplementary Table 1)*

40  
41 The analysis included 20,94321,576 hospitalizations with a principal diagnosis of CLD during  
42 2005-2010 for a total of 14,77414,977 patients. The annual number of claims ranged from  
43 minimum of 4,0203,475 in 20085 to maximum of 4,3333,698 in 20057. The annual percent of  
44 re-hospitalizations was about 239%. The most common primary diagnoses were hepatic  
45  
46  
47  
48  
49  
50  
51  
52  
53  
54

1  
2  
3  
4  
5  
6  
7  
8  
9  
10  
11  
12  
13  
14  
15  
16  
17  
18  
19  
20  
21  
22  
23  
24  
25  
26  
27  
28  
29  
30  
31  
32  
33  
34  
35  
36  
37  
38  
39  
40  
41  
42  
43  
44  
45  
46  
47  
48  
49  
50  
51  
52  
53  
54  
55  
56  
57  
58  
59  
60

encephalopathy (~~21.6%~~25.10%), non-alcoholic cirrhosis of liver (~~15.7%~~18.01%), alcoholic cirrhosis of liver (~~13.0%~~15.16%), and sclerosing cholangitis (6.17%)~~primary liver cancer (6.4%)~~.

During the study period, the observed in-hospital mortality decreased from 11.81% ~~11.75%~~ to 8.38% ~~8.73%~~ ( $p < 0.001$ ), post-discharge mortality decreased ~~increased~~ from 34.73% ~~36.37%~~ to 35.8% ~~33.82%~~ ( $p = 0.0099$  ~~0.036~~), the average number of diagnoses per claim increased from 7.90 ~~7.92~~ to 8.60 ~~8.64~~ ( $p < 0.001$ ), and Charlson score increased (~~1.35~~1.31 to 1.431.36;  $p < 0.001$ ).

The proportion of patients discharged to home decreased, while the proportion discharged to hospice or continued care increased.

The number of admissions, diagnoses and procedures and male gender were independently associated with increased risk for in-hospital mortality. Independent predictors of short-term post-discharge mortality were discharge disposition, number of admissions, Charlson score, gender and LOS during hospitalization. Age appeared to be a stronger predictor of post-discharge mortality than in-hospital mortality. The adjusted in-hospital mortality rate decreased between 2005 and 2010, while the adjusted post-discharge mortality rate remained stable.

Furthermore, there were regional and racial variations in post-discharge mortality using the standard reference categories (Table 3).

#### *Inpatient spending for Medicare beneficiaries with CLD*

The proportion of CLD-related inpatient spending in the total inpatient spending for Medicare beneficiaries increased from 7.70% ~~0.63%~~ in 2005 to 8.84% ~~in 2008 and decreased to 7.66%~~ 0.81% in 2010. Hospital charges increased from \$34,398 to \$43,354 per claim ( $p < 0.001$ ), ~~total~~

1  
2  
3  
4  
5  
6  
7  
8  
9 payments increased from \$~~11,786~~11,769 to \$~~12,773~~12,347 per claim ( $p < 0.001$ ), average LOS  
10 decreased from ~~6.116~~6.02 days to ~~5.965~~5.74 days ( ~~$p < 0.001$~~  $p = 0.002$ ). Independent predictors of  
11 increases in ~~LOS hospital charges~~ included ~~black or Hispanic race/ethnicity~~, number of  
12 diagnoses and procedures, ~~died in hospital or disposition other than to home~~, ~~LOS and dying~~  
13 ~~during the hospitalization~~. Independent predictors of increases in ~~estimated costs~~total payments  
14 were similar. ~~The adjusted total payments also increased with LOS and across the study years.~~  
15 ~~Independent predictors of LOS increases were race, ESRD, disposition other than to home,~~  
16 ~~number of diagnoses, and number of procedures~~ (Table 4).  
17  
18  
19  
20  
21  
22  
23  
24  
25

26 *Demographics and outcomes for outpatients with CLD (Table 1, Supplementary Table 2):*

27 A total of 515,990 CLD-related outpatient claims for 244,196 unique Medicare beneficiaries  
28 with CLD were included for the study period. Of those, 42.5% were the claims with CLD as a  
29 primary diagnosis.  
30  
31  
32  
33

34  
35 The number of patients with at least one CLD claim ranged from the minimum of 38,485 in 2008  
36 to the maximum of 44,546 in 2010, representing approximately 770,000-890,000 Medicare  
37 beneficiaries with CLD nationwide. The most prevalent CLD diagnosis on outpatient claims was  
38 non-alcoholic cirrhosis of liver (ICD-9 code 571.5) that was present on 14.0% outpatient claims  
39 in patients with CLD. The most prevalent primary diagnoses on claims where CLD was a  
40 secondary diagnosis were abdominal pain (789.00), type II diabetes mellitus without mention of  
41 complication (250.00), and end-stage renal disease (585.6) each present 3.3% of claims with  
42 CLD.  
43  
44  
45  
46  
47  
48  
49  
50  
51  
52  
53  
54



1  
2  
3  
4  
5  
6  
7  
8  
9  
10  
11  
12  
13  
14  
15  
16  
17  
18  
19  
20  
21  
22  
23  
24  
25  
26  
27  
28  
29  
30  
31  
32  
33  
34  
35  
36  
37  
38  
39  
40  
41  
42  
43  
44  
45  
46  
47  
48  
49  
50  
51  
52  
53  
54  
55  
56  
57  
58  
59  
60

Similarly to the inpatient population, the proportion of patients who were less than 65 years old increased from 30.5% in 2005 to 34.3% in 2010 ( $p<0.0001$ ). Ethnic profile of a Medicare beneficiary with CLD also shifted towards a lower proportion of Caucasians: from 81.94% to 80.58% ( $p<0.0001$ ). The proportion of patients living in the South region also slightly increased, while the gender distribution of Medicare beneficiaries with CLD did not change with 45.8%-46.5% of patients being male (Table 1).

~~A total of 271,552 CLD-related outpatient claims for 137,347 unique Medicare beneficiaries with CLD were included for the study period. The number of patients with at least one claim related to their CLD ranged from the minimum of 21,578 in 2008 to the maximum of 23,946 in 2005, representing approximately 430,000-480,000 Medicare beneficiaries with CLD nationwide. The average number of claims per patient did not change during the study period. The most prevalent primary diagnoses on outpatient claims were non-alcoholic cirrhosis of liver (11.5%), abnormal liver scan (10.4%), chronic hepatitis C without mention of hepatic coma (8.8%), other diagnosis of chronic liver disease (5.6%), liver disorders of iron metabolism (5.4%), nonspecific elevation of levels of transaminases (5.4%), and other nonspecific abnormal liver enzymes (5.2%). Similar to findings with the inpatient population, the proportion of patients who were less than 65 years old increased. This was primarily driven by increases in the proportion of patients who were Medicare eligible because of disability.~~

Outpatient spending for Medicare beneficiaries with CLD (Table 5 and Table 6)

The proportion of total outpatient spending for claims with CLD in the total outpatient spending for Medicare beneficiaries decreased from 1.38% in 2005 to 1.34% in 2010. The average number

1  
2  
3  
4  
5  
6  
7  
8  
9 of claims per patient per year did not change during the study period remaining at the level of  
10 approximately 2.10-2.12 claims per year (p=0.56). Per-patient yearly total payment as well as  
11 yearly payment by Medicare and the proportion of Medicare's responsibility all increased over  
12 time (all p<0.0001). At the same time, the average payment by a patient and the proportion of a  
13 beneficiary-paid amount decreased between 2005 and 2010 (both p<0.001) (Table 5).

14  
15  
16  
17  
18  
19  
20 In multivariate analysis, total payments have been found to be decreasing over the study period  
21 by -1.66% (95% CI = -1.98% to -1.34%) per calendar year. The average number of diagnoses per  
22 claim and the number of outpatient procedures per year were both independently associated with  
23 total payments (Table 6). However, after ESRD, being in the youngest age group (less than 65  
24 years old) was the most important predictor of payments (+50.2% (+46.3-54.3%)), likely due to  
25 the disability-related Medicare eligibility requirements for such patients. Also, there were racial  
26 and geographic variations in payments; in particular, being Asian or Hispanic were independent  
27 predictors of higher total payments in comparison to the reference Caucasians, while being  
28 African-American was associated with lower payments (Table 6). Finally, the reference  
29 Northeast location was associated with the lowest payments in comparison to all other locations  
30 (Table 6).

31  
32  
33  
34  
35  
36  
37  
38  
39  
40 ~~The proportion of CLD related outpatient spending in the total outpatient spending for Medicare~~  
41 ~~beneficiaries decreased from 0.44% in 2005 to 0.37% in 2010. The average number of claims per~~  
42 ~~year did not change during the study period. Average total payment, average payment by~~  
43 ~~Medicare, average charge, and Medicare's responsibility increased over time (p < 0.001 for all).~~  
44 ~~However, the average payment by patients and beneficiary paid amount decreased over time (p <~~  
45 ~~0.001 for all). After multivariate analysis, total payments actually decreased over the study~~  
46  
47  
48  
49  
50  
51  
52  
53  
54  
55  
56  
57  
58  
59  
60

1  
2  
3  
4  
5  
6  
7  
8  
9  
10  
11  
12  
13  
14  
15  
16  
17  
18  
19  
20  
21  
22  
23  
24  
25  
26  
27  
28  
29  
30  
31  
32  
33  
34  
35  
36  
37  
38  
39  
40  
41  
42  
43  
44  
45  
46  
47  
48  
49  
50  
51  
52  
53  
54  
55  
56  
57  
58  
59  
60

~~period. The average number of diagnoses per claim, procedures per claim, and the presence of ESRD were independently associated with total payments. Being in the youngest age group (less than 65 years old) was the most important predictor of payments. Also, there were racial and geographic variations in payments—being Asian or Hispanic were strong predictors of total payments. A Midwest location was inversely related to payment whereas location in California was strongly related to higher payment. In terms of proportion of beneficiary paid amount, independent predictors were similar to payments except the presence of ESRD was not associated.~~

## DISCUSSION

This is the first study to report inpatient and outpatient clinical outcomes and Medicare resource utilization for patients with CLD. The majority of CLD primary diagnoses on inpatient claims were hepatic encephalopathy and cirrhosis. Interestingly, the Medicare population with ESRD and younger than 65 are becoming a larger portion of this cohort, Although the observed increase in the number of diagnoses per claim and Charlson index may be due to the CLD population becoming more complex with more comorbidities and related conditions, prior reports suggest that such changes might also be explained by the documentation and coding practices [12].

~~Our data~~The risk-adjusted analysis showed that both in-hospital mortality and length of stay decreased. The potential reasons for a decrease in inpatient mortality include improvements in quality, efficiency of care delivery and increasing use of hospice services [13, 14] while the decrease in the length of stay may also be due to changes in payment arrangements and discharge

practices. In fact, it is possible the recent focus on “hospital efficiency” has moved a number of CLD patients who were previously cared for in the inpatient setting, to the outpatient arena. This may have resulted in a decrease in inpatient LOS or even mortality but an increase in disease severity in the outpatient setting.

~~Oddly, the presence of ESRD appeared to be “protective” against in hospital mortality perhaps because the patients are younger and receive closer care for their ESRD. We believe that understanding these variations in post discharge mortality may provide guidance to policy makers for appropriate resource allocation [14].~~

After adjusting for inflation, ~~hospitalizations charges and~~ total payments to ~~hospitals~~ Medicare for inpatient services significantly increased ( $p<0.0001$ ). As expected, independent predictors of ~~charges, payments, and LOS~~ were similar. Of note, minorities experienced higher ~~charges, payments, and LOS~~ and could be another target for better allocation of resources. The fact that ~~patients who were discharged to extended care facilities and inpatient deaths or who died were~~ were independently associated with higher inpatient resource utilization, is consistent with the notion that patients who are at highest risk for mortality consume the greatest portion of the health care resources. [15,16]. It has been previously reported that Hispanic patients with CLD (especially NAFLD) are at higher risk for adverse outcome such as cirrhosis and HCC which this study also corroborates as Hispanic ethnicity is independently associated with resource utilization. [6,9].

In the outpatient Medicare population, chronic hepatitis C cirrhosis, abnormal liver imaging, and NAFLD and chronic hepatitis C ~~were~~ being the most common CLD diagnoses with, and only

1  
2  
3  
4  
5  
6  
7  
8  
9  
10  
11  
12  
13  
14  
15  
16  
17  
18  
19  
20  
21  
22  
23  
24  
25  
26  
27  
28  
29  
30  
31  
32  
33  
34  
35  
36  
37  
38  
39  
40  
41  
42  
43  
44  
45  
46  
47  
48  
49  
50  
51  
52  
53  
54  
55  
56  
57  
58  
59  
60

approximately half of claims with the diagnosis of CLD had one listed as a primary diagnosis.

Once again, the proportion of patients younger than 65 years old and disability eligible increased.

As ~~charges~~, payments from Medicare and proportion of Medicare's responsibility increased, the beneficiary-paid amount ~~decreased and estimated payments decreased~~. Racial and geographic

variations in payment were again observed. Our study also showed that younger age was the most important independent predictor of Medicare spending. This is consistent with probably

~~due to~~ the fact that younger patients with CLD who qualify for Medicare can only be enrolled due to their disability or other chronic condition such as ESRD ~~may be sicker~~. [17,18].

Furthermore, we expect that the rate of patients with HCV will continue to increase as a result of the CDC's current guidelines which recommend screening all patients ages 45-65 regardless of risk factors for hepatitis C [19]. The HCV screening will help to identify cases earlier and with the new more effective treatments, these treatments can possibly lead to a cure, which may, over time, lead to a substantial decrease in the number of patients with advanced liver disease [20,21,22].

There were some limitations to our study. The exact dates were not available for the year 2005-

2009, making it impossible to assess the exact timing of post-discharge outcomes. Second, we

may have under-estimated post-discharge mortality. This may be due to the LDS denominator files for each calendar year are based on information known to CMS in March of the year

following hospitalizations so that some patients without date of death may have been dead but

treated as alive. However, 96% of death dates were validated suggesting that ~~making~~ the impact

of the "un-validated death date" on mortality can be very small. The restricted mortality data we

had access to did not allow to account for variability in the length of post-discharge follow-up in

Formatted: Adjust space between Latin and Asian text, Adjust space between Asian text and numbers, Tab stops: Not at 2.58"

1  
2  
3  
4  
5  
6  
7  
8  
9 a survival analysis. Because this was a retrospective cohort study, there were unmeasured  
10 confounders for which we could not adjust for, such as the availability of healthcare providers in  
11 patient's place of residence, history of [other chronic diseases and](#) major interventions, marital and  
12 socioeconomic status, history of substance abuse or psychiatric conditions, metabolic disorders,  
13 as well as the results of physical examination and physical activity which may be especially  
14 important for appreciating health status of the elderly population. We also could ~~not~~  
15 determine whether patients sought care outside their Medicare plan which potentially may have  
16 changed outcomes. [\[1923\]](#).  
17  
18  
19  
20  
21  
22  
23  
24

25  
26 In conclusion, CLD is a common disease entity with important patient and financial outcomes  
27 for the Medicare population. Although in-hospital mortality and LOS are decreasing, mortality  
28 after discharge remains stable. Also, [both inpatient and](#) outpatient spending by Medicare is  
29 ~~increasing. Our study of chronic hepatitis C in the Medicare beneficiaries showed similar results.~~  
30 [\[2420\]](#). Independent demographic and clinical predictors which we identified for payment and  
31 clinical outcomes can be used to target resource allocation for prevention. This last point is  
32 especially important as the Affordable Care Act (ACA) has begun, ensuring insurance coverage  
33 is available to all and patients with pre-existing conditions are not excluded nor do they suffer  
34 from lapse in coverage. [\[2521\]](#). It will be imperative to track the impact of the ACA on the long-  
35 term outcomes of patients living with CLD especially when one reviews the patients most likely  
36 to have CLD are also the patients most likely to be uninsured. Hispanics are the second most  
37 prevalent group to be uninsured, especially the young Hispanic male who is working. [\[2622\]](#). In  
38 this study, younger Hispanic males were more likely to have CLD than any other group.  
39 Therefore, efforts should be directed to ensure this group becomes knowledgeable about the  
40  
41  
42  
43  
44  
45  
46  
47  
48  
49  
50  
51  
52  
53  
54  
55  
56  
57  
58  
59  
60

1  
2  
3  
4  
5  
6  
7  
8  
9  
10  
11  
12  
13  
14  
15  
16  
17  
18  
19  
20  
21  
22  
23  
24  
25  
26  
27  
28  
29  
30  
31  
32  
33  
34  
35  
36  
37  
38  
39  
40  
41  
42  
43  
44  
45  
46  
47  
48  
49  
50  
51  
52  
53  
54  
55  
56  
57  
58  
59  
60

importance and availability of insurance as well as healthy living. [Finally, the results are pertinent as the cohort of baby boomers are increasingly eligible for Medicare. Furthermore, the epidemic of obesity will continue to fuel the increasing prevalence of NAFLD and related cirrhosis. As the population of patients with HCV and NAFLD become increasingly eligible for Medicare, the future burden of CLD on Medicare, the most important source of health care insurance coverage in the U.S. will become even more important.](#)

#### REFERENCES

1. Gravitz L. Introduction: a smouldering public-health crisis. *Nature* 2011;474(7350):S2-4.
2. Chak E, Tala AH, Sherman KE, et al. Hepatitis C virus infection in the USA: an estimate of true prevalence. *Liver Int.* 2011;31:1090-1101.
3. Ly KN, Xing J, Klevens RM, Jiles RB, Ward JW, Holmberg SD. The increasing burden of mortality from viral hepatitis in the United States between 1999 and 2007. *Ann Intern Med.* 2012 Feb 21;156(4):271-8.
4. Institute of Medicine. *Hepatitis and Liver Cancer: A National Strategy for Prevention and Control of Hepatitis B and C.* Washington, DC: The National Academies Press;2010.
5. Thomas DL, Seeff LB. Natural history of hepatitis C. *Clin Liver Dis.* 2005;9:383-98, vi.
6. Lazo M, Hernaez R, Bonekamp S, Kamel IR, Brancati FL, Guallar E, Clark JM. Non-alcoholic fatty liver disease and mortality among US adults: prospective cohort study. *BMJ.* 2011 Nov 18;343:d6891.

- 1  
2  
3  
4  
5  
6  
7  
8  
9 7. Pradat P, Voirin N, Tillmann HL, Chevallier M, Trépo C. Progression to cirrhosis in hepatitis  
10 C patients: an age-dependent process. *Liver Int.* 2007;27(3):335–9.  
11  
12 8. Singer ME, Younossi ZM. Cost-effectiveness of screening for hepatitis C virus in  
13 asymptomatic, average risk adults: has the time come? *Am. J. Med.* 2001;111:614-621.  
14  
15 9. Koebnick C, Getahun D, Reynolds K, Coleman KJ, Porter AH, Lawrence JM, Punyanitya M,  
16 Quinn VP, Jacobsen SJ. Trends in nonalcoholic fatty liver disease-related hospitalizations in US  
17 children, adolescents, and young adults. *J Pediatr Gastroenterol Nutr.* 2009 May;48(5):597-603.  
18  
19 doi: 10.1097/MPG.0b013e318192d224.  
20  
21  
22 10. [Health Care Spending and the Medicare Program. Published by Medicare Payment Advisory](#)  
23 [Commission, Washington DC. June 2012.](#)  
24  
25  
26  
27 11. Deyo RA, Cherkin DC, Ciol MA. Adapting a clinical comorbidity index for use with *ICD-9-*  
28 *CM* administrative databases. *J Clin Epidemiol* 1992;45 (6) 613- 61  
29  
30 12. Lindenauer PK, Lagu T, Shieh MS, Pekow PS, Rothberg MB. Association of diagnostic  
31 coding with trends in hospitalizations and mortality of patients with pneumonia, 2003-2009.  
32  
33 *JAMA.* 2012 Apr 4;307(13):1405-13.  
34  
35  
36 13. Yong-Fang K, Goodwin J. Impact of Hospitalists on Length of Stay in the Medicare  
37 Population: Variation by Hospital and Patient Characteristics. *J Am Geriatr Soc.* 2010; 58(9):  
38 1649–1657.  
39  
40 14. Newhouse JP, Garber AM. Geographic Variation in Medicare Services. *N Engl J Med* 2013.  
41 368(16): 1465-1468.  
42  
43 15. Pyenson B, Fitch K, Iwasaki K. Consequences of Hepatitis C Virus (HCV): Costs of a Baby  
44 Boomer Epidemic of Liver Disease. New York, NY: Milliman, Inc; May 18, 2009. [Internet,  
45  
46  
47  
48  
49  
50  
51  
52  
53  
54  
55  
56  
57  
58  
59  
60



1  
2  
3  
4  
5  
6  
7  
8  
9 cited 2013 Mar 12]. Available from: <http://publications.milliman.com/research/health-rr/pdfs/consequences-hepatitis-c-virus-RR05-18-09.pdf>

10  
11  
12 16. Wong JB, McQuillan GM, McHutchison JG, Poynard T. Estimating future hepatitis C  
13 morbidity, mortality, and costs in the United States. *Am J Public Health* 2000;90(10):1562–9.

14  
15  
16 17. Coughlin TA, Waidmann TA, Phadera L. Among dual eligibles, identifying the highest-cost  
17 individuals could help in crafting more targeted and effective responses. *Health Aff (Millwood)*.  
18 2012 May;31(5):1083-91. doi: 10.1377/hlthaff.2011.0729. Epub 2012 Apr 18.

19  
20  
21 18. Bubolz T, Emerson C, Skinner J. State spending on dual eligibles under age 65 shows  
22 variations, evidence of cost shifting from Medicaid to Medicare. *Health Aff (Millwood)*. 2012  
23 May;31(5):939-47. doi: 10.1377/hlthaff.2011.0921.

24  
25  
26  
27  
28 19. Centers for Disease Control. Testing recommendations for chronic Hepatitis C. Obtained  
29 from the world wide web at: <http://www.cd.gov/Hepatitis/guidelinsC.htm>. Last accessed on 3  
30 April 2014.

31  
32  
33 20. Deuffic-Burban S, Mathurin P, Rosa I, Bouvier AM, Cannesson A, Mourad A, Canva V,  
34 Louvet A, Deltenre P, Boleslawski E, Truant S, Pruvot FR, Dharancy S. Impact of emerging  
35 hepatitis C treatment on future needs for liver transplantation *Dig Liver Dis*. 2014  
36 Feb;46(2):157-63. doi: 10.1016/j.dld.2013.08.137. Epub 2013 Oct 10.

37  
38  
39  
40  
41 21. Sofosbuvir for previously untreated chronic hepatitis C infection. Lawitz E, Mangia A,  
42 Wyles D, Rodriguez-Torres M, Hassanein T, Gordon SC, Schultz M, Davis MN, Kayali Z,  
43 Reddy KR, Jacobson IM, Kowdley KV, Nyberg L, Subramanian GM, Hyland RH, Arterburn S,  
44 Jiang D, McNally J, Brainard D, Symonds WT, McHutchison JG, Sheikh AM, Younossi Z, Gane  
45 *EJ. N Engl J Med*. 2013 May 16;368(20):1878-87. doi: 10.1056/NEJMoa1214853. Epub 2013  
46 Apr 23.

- 1  
2  
3  
4  
5  
6  
7  
8  
9 [22. Jacobson IM, Gordon SC, Kowdley KV, Yoshida EM, Rodriguez-Torres M, Sulkowski MS, Shiffman ML, Lawitz E, Everson G, Bennett M, Schiff E, Al-Assi MT, Subramanian GM, An D, Lin M, McNally J, Brainard D, Symonds WT, McHutchison JG, Patel K, Feld J, Pianko S, Nelson DR; POSITRON Study; FUSION Study. Sofosbuvir for hepatitis C genotype 2 or 3 in patients without treatment options. N Engl J Med. 2013 May 16;368\(20\):1867-77. doi: 10.1056/NEJMoa1214854. Epub 2013 Apr 23.](#)
- 10  
11  
12  
13  
14  
15  
16  
17  
18  
19  
20  
21  
22  
23  
24  
25  
26  
27  
28  
29  
30  
31  
32  
33  
34  
35  
36  
37  
38  
39  
40  
41  
42  
43  
44  
45  
46  
47  
48  
49  
50  
51  
52  
53  
54  
55  
56  
57  
58  
59  
60
- ~~1923~~. Quan et al. Coding algorithms for defining comorbidities in ICD-9-CM and ICD-10 administrative data. Med Care 2005 Nov; 43(11):1073-1077.
- ~~2024~~. Younossi ZM, Stepanova M, Mishra A, Venkatesan C, Henry L, Hunt S. The impact of chronic hepatitis C on resource utilization and in-patient mortality for Medicare beneficiaries between 2005 and 2010. AP&T. 2013 Aug. doi:10.1111/apt.12485
- ~~2125~~. Medicare Payment Advisory Group. Medicare and Health Care Spending. June 2012. Obtained from the world wide web at: <http://www.medpac.gov/documents/Jun12DataBookEntireReport.pdf>. Last accessed on 8 Oct 2013.
- ~~2226~~. Centers for Medicare and Medicaid Services. Audience Segmentation for the Emerging Health Care Marketplace. March 22, 2013. Obtained from the world wide web at <http://www.marketplace.cms.gov>. Last accessed on 8 Oct 2013.

1  
2  
3  
4  
5  
6  
7  
8  
9  
10  
11  
12  
13  
14  
15  
16  
17  
18  
19  
20  
21  
22  
23  
24  
25  
26  
27  
28  
29  
30  
31  
32  
33  
34  
35  
36  
37  
38  
39  
40  
41  
42  
43  
44  
45  
46  
47  
48  
49  
50  
51  
52  
53  
54  
55  
56  
57  
58  
59  
60**Table 1.** Clinico-demographic characteristics of Medicare beneficiaries who sought inpatient and outpatient care in 2005-2010.

| Characteristics                 | Inpatient   | P-value * | Outpatient   | P-value * |
|---------------------------------|-------------|-----------|--------------|-----------|
| No. of patients                 | 14,774      |           | 137,347      |           |
| No. of hospitalizations         | 20,943      |           | 271,552      |           |
| Percent of re-hospitalizations  | 29.46       |           | NA           |           |
| Number of diagnoses, mean (SD)  | 8.24 (1.58) | <0.0001   | 2.26 (1.72)  | <0.0001   |
| Number of procedures, mean (SD) | 1.68 (1.78) | 0.1184    | 0.001 (0.07) | 0.0465    |
| Charlson score, mean (SD)       | 1.44 (1.75) | <0.0001   | 0.95 (1.23)  | <0.0001   |
| Age                             |             |           |              |           |
| —<65                            | 38.84       | <0.0001   | 32.78        | <.0001    |
| —65-69                          | 17.88       | <0.0001   | 21.46        | 0.6715    |
| —70-74                          | 14.99       | 0.0004    | 16.96        | 0.0003    |
| —75-79                          | 11.56       | <0.0001   | 13.31        | <.0001    |
| —80-84                          | 9.29        | 0.0454    | 9.18         | <.0001    |
| —85 and over                    | 7.45        | 0.2001    | 6.30         | 0.2088    |
| Race                            |             |           |              |           |
| —White                          | 80.00       | 0.0025    | 81.53        | <.0001    |
| —Black                          | 10.71       | 0.0911    | 10.44        | <.0001    |
| —Hispanic                       | 4.61        | 0.0718    | 2.71         | 0.2113    |
| —Other                          | 4.67        | 0.1445    | 2.62         | 0.0092    |
| Male gender                     | 55.09       | 0.5655    | 44.93        | 0.7866    |
| ESRD                            | 6.40        | <0.0001   | 2.54         | 0.4234    |
| Discharge status                |             |           |              |           |
| —Home                           | 51.90       | <0.0001   | NA           | NA        |
| —Continued care                 | 36.70       | <0.0001   | NA           | NA        |
| —Hospice                        | 4.75        | <0.0001   | NA           | NA        |
| —Died                           | 6.65        | <0.0001   | NA           | NA        |
| Region                          |             |           |              |           |
| —Northeast                      | 19.83       | 0.2126    | 20.66        | 0.5634    |
| —South                          | 40.58       | 0.4086    | 35.01        | 0.0256    |
| —Midwest                        | 22.28       | 0.0138    | 26.11        | 0.1438    |
| —West                           | 8.31        | 0.3719    | 9.25         | 0.2413    |
| —California                     | 9.00        | <0.0001   | 8.97         | 0.0006    |

\* p value represents the difference in the parameter between the study years

NA – not applicable

**Table 2.** Resource utilization and mortality outcomes for Medicare beneficiaries with CLD who sought inpatient care in 2005-2010.

|                                  | 2005                          | 2006                          | 2007                          | 2009                          | 2010                          | p       |
|----------------------------------|-------------------------------|-------------------------------|-------------------------------|-------------------------------|-------------------------------|---------|
| Length of stay                   |                               |                               |                               |                               |                               |         |
| —Mean (SD)                       | 6.11 (5.75)                   | 6.21 (6.23)                   | 6.06 (5.71)                   | 5.83 (5.71)                   | 5.96 (5.79)                   | 0.0017  |
| —Median (IQR)                    | 4 (3, 8)                      | 4 (3, 7)                      | 4 (3, 7)                      | 4 (2, 7)                      | 4 (3, 7)                      |         |
| Hospital charge                  |                               |                               |                               |                               |                               |         |
| —Mean (SD)                       | 34,398<br>(55,946)            | 37,544<br>(67,000)            | 36,200<br>(52,282)            | 40,636<br>(63,727)            | 43,354<br>(70,128)            | <0.0001 |
| —Median (IQR)                    | 19,199<br>(10,804,<br>36,364) | 20,059<br>(11,050,<br>39,295) | 21,741<br>(12,032,<br>40,061) | 22,735<br>(12,291,<br>43,633) | 24,266<br>(13,768,<br>44,974) |         |
| Estimated cost                   |                               |                               |                               |                               |                               |         |
| —Mean (SD)                       | 11,786<br>(15,413)            | 12,039<br>(1,5893)            | 12,029<br>(24,037)            | 12,447<br>(16,006)            | 12,773<br>(17,359)            | <0.0001 |
| —Median (IQR)                    | 8,411<br>(7,295,<br>10,771)   | 8,413<br>(7,283,<br>10,698)   | 8,490<br>(7,255,<br>10,849)   | 9,459<br>(6,134,<br>12,252)   | 9,665<br>(6,147,<br>12,698)   |         |
| In-hospital mortality rate, %    | 11.75                         | 9.94                          | 8.17                          | 8.75                          | 8.73                          | 0.0001  |
| Post-discharge mortality rate, % | 34.68                         | 31.26                         | 34.89                         | 34.84                         | 35.79                         | 0.0363  |

**Table 3.** Predictors of in-hospital mortality and overall post-discharge mortality in Medicare beneficiaries hospitalized for CLD in 2005-2010\*.

| Predictors                   | In-hospital Mortality |         | Post-discharge Mortality <sup>†</sup> |         |
|------------------------------|-----------------------|---------|---------------------------------------|---------|
|                              | OR (95% CI)           | P-value | OR (95% CI)                           | P-value |
| <b>Age</b>                   |                       |         |                                       |         |
| —65-69                       | Ref                   |         | Ref                                   |         |
| —<65                         | 0.85 (0.72, 1.00)     | 0.0537  | 0.79 (0.70, 0.89)                     | 0.0001  |
| —70-74                       | 1.03 (0.85, 1.25)     | 0.7882  | 1.08 (0.94, 1.25)                     | 0.2628  |
| —75-79                       | 1.25 (1.03, 1.53)     | 0.0267  | 1.27 (1.10, 1.48)                     | 0.0012  |
| —80-84                       | 0.89 (0.70, 1.12)     | 0.3045  | 1.24 (1.06, 1.45)                     | 0.0063  |
| —85 and over                 | 1.00 (0.79, 1.27)     | 0.9967  | 1.52 (1.30, 1.79)                     | <0.0001 |
| <b>Gender</b>                |                       |         |                                       |         |
| —Female                      | Ref                   |         | Ref                                   |         |
| —Male                        | 1.26 (1.12, 1.41)     | 0.0001  | 1.34 (1.24, 1.46)                     | <0.0001 |
| <b>Race</b>                  |                       |         |                                       |         |
| —White                       | Ref                   |         | Ref                                   |         |
| —Black                       | 1.15 (0.96, 1.38)     | 0.1204  | 0.83 (0.72, 0.95)                     | 0.0073  |
| —Hispanic                    | 0.77 (0.56, 1.06)     | 0.1101  | 0.92 (0.75, 1.13)                     | 0.4287  |
| —Other                       | 1.30 (1.00, 1.67)     | 0.0482  | 0.84 (0.68, 1.02)                     | 0.0834  |
| <b>ESRD</b>                  |                       |         |                                       |         |
| —No                          | Ref                   |         | Ref                                   |         |
| —Yes                         | 0.69 (0.54, 0.89)     | 0.0034  | 0.96 (0.81, 1.13)                     | 0.6072  |
| <b>Number of admissions</b>  |                       |         |                                       |         |
| —1                           | Ref                   |         | Ref                                   |         |
| —≥2                          | 1.58 (1.39-1.79)      | <0.0001 | 1.66 (1.51-1.83)                      | <0.0001 |
| <b>Discharge destination</b> |                       |         |                                       |         |
| —Home                        | N/A                   |         | Ref                                   |         |
| —Continued care              | N/A                   |         | 2.43 (2.23, 2.65)                     | <0.0001 |
| —Hospice                     | N/A                   |         | 49.22 (37.13, 65.25)                  | <0.0001 |
| <b>Region</b>                |                       |         |                                       |         |
| —Northeast                   | Ref                   |         | Ref                                   |         |
| —South                       | 0.87 (0.75, 1.01)     | 0.0613  | 1.20 (1.08, 1.35)                     | 0.0012  |
| —Midwest                     | 0.70 (0.59, 0.83)     | <0.0001 | 1.01 (0.89, 1.15)                     | 0.8582  |
| —West                        | 0.80 (0.63, 1.01)     | 0.0639  | 1.24 (1.05, 1.46)                     | 0.0130  |
| —California                  | 0.86 (0.69, 1.08)     | 0.1951  | 1.22 (1.04, 1.45)                     | 0.0169  |
| <b>Calendar Year</b>         | 0.91 (0.89, 0.94)     | <0.0001 | 0.99 (0.97, 1.02)                     | 0.4909  |
| <b>Number of diagnosis</b>   | 1.22 (1.16, 1.28)     | <0.0001 | 1.05 (1.02, 1.08)                     | 0.0007  |
| <b>Number of procedures</b>  | 1.32 (1.28, 1.37)     | <0.0001 | 0.99 (0.96, 1.01)                     | 0.3812  |
| <b>Charlson score</b>        | 1.03 (0.99, 1.06)     | 0.1151  | 1.23 (1.20, 1.26)                     | <0.0001 |
| <b>LOS</b>                   | 1.01 (1.00, 1.02)     | 0.1244  | 1.01 (1.00, 1.02)                     | 0.0039  |

\* Data in 2008 were excluded from analysis due to missing information on patient's residence region.

**Table 4.** Predictors of LOS, hospital charge and total payment of hospitalizations of Medicare beneficiaries for CLD in 2005-2010\*.

| Predictors            | LOS Increase           |         | Hospital-Charge-Increase† |         | Estimated-Cost-Increase‡ |         |
|-----------------------|------------------------|---------|---------------------------|---------|--------------------------|---------|
|                       | % (95% CI) †           | P-value | % (95% CI) ‡              | P-value | % (95% CI) ‡             | P-value |
| Age                   |                        |         |                           |         |                          |         |
| —65-69                | Ref                    |         | Ref                       |         | Ref                      |         |
| —<65                  | 0.07 (-2.47, 2.61)     | 0.9557  | -2.64 (-4.92, -0.36)      | 0.0233  | 5.09 (3.11, 7.06)        | <0.0001 |
| —70-74                | -0.99 (-4.07, 2.09)    | 0.5293  | -4.71 (-7.48, -1.94)      | 0.0009  | -6.08 (-8.48, -3.68)     | <0.0001 |
| —75-79                | 2.36 (-0.97, 5.69)     | 0.1649  | -3.05 (-6.05, -0.06)      | 0.0456  | -8.15 (-10.74, -5.55)    | <0.0001 |
| —80-84                | 2.85 (-0.72, 6.42)     | 0.1181  | -3.22 (-6.44, -0.01)      | 0.0496  | -11.91 (-14.70, -9.13)   | <0.0001 |
| —85 and over          | 1.14 (-2.73, 5.00)     | 0.5635  | -2.45 (-5.94, 1.03)       | 0.1673  | -14.17 (-17.19, -11.16)  | <0.0001 |
| Gender                |                        |         |                           |         |                          |         |
| —Female               | Ref                    |         | Ref                       |         | Ref                      |         |
| —Male                 | -4.05 (-5.85, -2.26)   | <0.0001 | 1.69 (0.07, 3.31)         | 0.0407  | 4.65 (3.25, 6.06)        | <0.0001 |
| Race                  |                        |         |                           |         |                          |         |
| —White                | Ref                    |         | Ref                       |         | Ref                      |         |
| —Black                | 11.72 (8.80, 14.64)    | <0.0001 | 4.86 (2.23, 7.48)         | 0.0003  | 2.66 (0.38, 4.93)        | 0.0220  |
| —Hispanic             | 9.71 (5.47, 13.95)     | <0.0001 | 11.04 (7.23, 14.85)       | <0.0001 | 9.54 (6.23, 12.85)       | <0.0001 |
| —Other                | 1.29 (-2.98, 5.56)     | 0.5536  | 3.98 (0.15, 7.81)         | 0.0417  | 8.17 (4.85, 11.49)       | <0.0001 |
| ESRD                  |                        |         |                           |         |                          |         |
| —No                   | Ref                    |         | Ref                       |         | Ref                      |         |
| —Yes                  | 3.84 (0.06, 7.62)      | 0.0467  | -5.45 (-8.87, -2.04)      | 0.0017  | -1.07 (-4.03, 1.89)      | 0.4780  |
| Discharge destination |                        |         |                           |         |                          |         |
| —Home                 | Ref                    |         | Ref                       |         | Ref                      |         |
| —Continued-care       | 37.32 (35.36, 39.29)   | <0.0001 | 0.46 (-1.34, 2.26)        | 0.6148  | -11.70 (-13.27, -10.13)  | <0.0001 |
| —Hospice              | 35.98 (31.70, 40.25)   | <0.0001 | -0.08 (-3.96, 3.79)       | 0.9662  | -7.56 (-10.91, -4.22)    | <0.0001 |
| —Died                 | 25.86 (22.14, 29.58)   | <0.0001 | 5.58 (2.23, 8.92)         | 0.0011  | 1.54 (-1.36, 4.44)       | 0.2978  |
| Region                |                        |         |                           |         |                          |         |
| —Northeast            | Ref                    |         | Ref                       |         | Ref                      |         |
| —South                | -3.03 (-5.45, -0.60)   | 0.0143  | -17.34 (-19.52, -15.16)   | <0.0001 | -17.88 (-19.77, -15.99)  | <0.0001 |
| —Midwest              | -11.51 (-14.23, -8.78) | <0.0001 | -23.31 (-25.76, -20.86)   | <0.0001 | -10.75 (-12.87, -8.62)   | <0.0001 |
| —West                 | -9.95 (-13.62, -6.28)  | <0.0001 | -13.54 (-16.83, -10.24)   | <0.0001 | -6.08 (-8.94, -3.22)     | <0.0001 |
| —California           | -6.23 (-9.81, -2.66)   | 0.0006  | 43.90 (40.68, 47.13)      | <0.0001 | 8.62 (5.83, 11.42)       | <0.0001 |
| Calendar-Year         | -2.67 (-3.15, -2.18)   | <0.0001 | 3.94 (3.50, 4.38)         | <0.0001 | 0.70 (0.32, 1.08)        | 0.0003  |
| Number of diagnosis   | 9.07 (8.49, 9.65)      | <0.0001 | 2.97 (2.44, 3.50)         | <0.0001 | -0.28 (-0.75, 0.19)      | 0.2389  |
| Number of procedures  | 18.08 (17.56, 18.59)   | <0.0001 | 19.95 (19.44, 20.47)      | <0.0001 | 13.96 (13.51, 14.40)     | <0.0001 |
| Charlson score        | -0.85 (-1.37, -0.33)   | <0.0015 | -0.36 (-0.84, 0.12)       | 0.1394  | 0.77 (0.35, 1.18)        | 0.0003  |
| LOS                   | N/A                    | N/A     | 8.55 (8.36, 8.74)         | <0.0001 | 4.22 (4.08, 4.36)        | <0.0001 |

\* Data in 2008 were excluded from multivariate analysis due to missing information on region.

† Hospital charge and cost were adjusted to the 2010 dollars using annual inflation rate of 3%.

‡ For categorical variable, this represents the predicted percentage of increase in outcome for one level of the predictor compared to the reference level, while holding all other variables constant; for continuous variable, this represents the predicted percentage of increase in outcome for each unit increase in that variable, while holding all other variables constant. A negative increase represents a decrease.

1  
2  
3  
4  
5  
6  
7  
8  
9  
10  
11  
12  
13  
14  
15  
16  
17  
18  
19  
20  
21  
22  
23  
24  
25  
26  
27  
28  
29  
30  
31  
32  
33  
34  
35  
36  
37  
38  
39  
40  
41  
42  
43  
44  
45  
46  
47  
48  
49  
50  
51  
52  
53  
54  
55  
56  
57  
58  
59  
60**Table 5.** Resource utilization for Medicare beneficiaries with CLD who sought outpatient care in 2005-2010 (median (IQR)).

|                                   | 2005                 | 2006                 | 2007                 | 2008                 | 2009                 | 2010                 | p      |
|-----------------------------------|----------------------|----------------------|----------------------|----------------------|----------------------|----------------------|--------|
| Average number of claims per year | 1.98 ± 2.68          | 2.01 ± 2.72          | 1.98 ± 2.62          | 1.97 ± 2.50          | 1.96 ± 2.47          | 1.96 ± 2.40          | 0.0569 |
| Average total payment, \$         | 151.2 (72.3-529.1)   | 163.9 (77.6-567.0)   | 167.0 (80.2-562.0)   | 154.5 (78.2-552.2)   | 159.0 (81.4-568.3)   | 158.5 (83.0-565.2)   | <.0001 |
| Average payment by patient, \$    | 45.5 (0.0-162.5)     | 41.2 (0.0-158.6)     | 40.5 (0.0-158.4)     | 38.6 (0.0-142.2)     | 37.6 (0.0-126.14)    | 36.6 (0.0-123.8)     | <.0001 |
| Average payment by Medicare, \$   | 113.7 (53.8-336.5)   | 122.5 (58.0-373.1)   | 124.4 (58.9-371.3)   | 117.3 (56.9-369.4)   | 120.9 (57.9-409.4)   | 120.3 (56.6-408.9)   | <.0001 |
| Average charge, \$                | 725.3 (241.1-2371.9) | 787.6 (260.0-2624.4) | 823.9 (277.4-2784.0) | 803.3 (283.7-2716.2) | 848.7 (290.6-2886.4) | 885.8 (312.9-2952.5) | <.0001 |
| Beneficiary paid amounts, %       | 20.0 (0-41.7)        | 20.0 (0-37.2)        | 20.0 (0-37.2)        | 19.9 (0-35.4)        | 19.4 (0-29.1)        | 19.7 (0-29.7)        | <.0001 |
| Medicare's responsibility, %      | 78.6 (55.9-100)      | 79.1 (61.6-100)      | 79.3 (61.8-100)      | 79.9 (63.8-100)      | 80.0 (68.1-100)      | 80.0 (68.0-100)      | <.0001 |

**Table 6.** Independent predictors of outpatient spending for Medicare beneficiaries with CLD.

| Predictors                                     | Estimated costs increase, %<br>(95% CI) |
|------------------------------------------------|-----------------------------------------|
| Calendar year                                  | -1.56 (-2.00 - -1.12)                   |
| Age <65                                        | +68.76 (+49.80 - +90.12)                |
| Age 65-69                                      | +37.05 (+32.03 - +42.26)                |
| Age 70-74                                      | +32.88 (+27.87 - +38.08)                |
| Age 75-79                                      | +23.40 (+18.59 - +28.40)                |
| Age 80-84                                      | +16.68 (+11.82 - +21.75)                |
| Male                                           | +10.27 (+8.44 - +12.12)                 |
| Black                                          | +1.56 (-1.21 - +4.42)                   |
| Hispanic                                       | +15.35 (+9.55 - +21.45)                 |
| Asian                                          | +32.05 (+24.30 - +40.27)                |
| Disability                                     | -4.75 (-15.05 - +6.80)                  |
| ESRD                                           | +7.84 (+1.33 - +14.77)                  |
| Location: Midwest                              | -3.82 (-6.12 - -1.46)                   |
| Location: South w/o California                 | -2.25 (-4.46 - +0.02)                   |
| Location: West                                 | +10.48 (+6.94 - +14.14)                 |
| Location: California                           | +15.43 (+11.65 - +19.34)                |
| Average number of diagnoses per claim, per dx  | +29.31 (+28.64 - +29.98)                |
| Number of outpatient procedures, per procedure | +18.09 (+13.63 - +22.72)                |

† The increase is in comparison to the reference value. A negative increase represents a decrease.



1  
2  
3  
4  
5  
6  
7  
8  
9  
10  
11  
12  
13  
14  
15  
16  
17  
18  
19  
20  
21  
22  
23  
24  
25  
26  
27  
28  
29  
30  
31  
32  
33  
34  
35  
36  
37  
38  
39  
40  
41  
42  
43  
44  
45  
46  
47  
48  
49  
50  
51  
52  
53  
54  
55  
56  
57  
58  
59  
60**Table 1.** Clinico-demographic characteristics of Medicare beneficiaries who sought inpatient and outpatient care in 2005-2010.

| Characteristics                   | Inpatient     |               |        | Outpatient  |             |         |
|-----------------------------------|---------------|---------------|--------|-------------|-------------|---------|
|                                   | 2005          | 2010          | p*     | 2005        | 2010        | p*      |
| No. of patients                   | 2,582         | 2,458         |        | 39,885      | 44,546      |         |
| No. of claims                     | 3,698         | 3,680         |        | 83,866      | 94,309      |         |
| Percent of re-hospitalizations, % | 24.20         | 25.83         | 0.0653 | NA          | NA          |         |
| Number of diagnoses               | 7.92 +/- 1.73 | 8.64 +/- 1.31 | <0.001 | 3.55 ± 2.11 | 4.32 ± 2.39 | <0.0001 |
| Number of procedures              | 1.59 +/- 1.75 | 1.67 +/- 1.79 | 0.2554 | 0.01 ± 0.16 | 0.01 ± 0.18 | NS      |
| Charlson score                    | 1.31 +/- 1.58 | 1.36 +/- 1.67 | <0.001 | 1.25 ± 1.46 | 1.43 ± 1.50 | <0.0001 |
| <b>Age</b>                        |               |               |        |             |             |         |
| <65, %                            | 38.18         | 42.47         | <0.001 | 30.48       | 34.33       | <0.001  |
| 65-69, %                          | 15.87         | 19.62         | <0.001 | 20.65       | 21.46       | 0.0055  |
| 70-74, %                          | 16.01         | 12.64         | <0.001 | 17.66       | 16.52       | 0.0006  |
| 75-79, %                          | 13.28         | 8.89          | <0.001 | 15.03       | 12.35       | <0.001  |
| 80-84, %                          | 9.19          | 8.40          | 0.0166 | 9.70        | 8.88        | <0.001  |
| 85 and over, %                    | 7.46          | 7.99          | 0.1107 | 6.49        | 6.47        | NS      |
| <b>Race</b>                       |               |               |        |             |             |         |
| White, %                          | 81.18         | 79.24         | 0.0162 | 81.85       | 80.58       | <0.001  |
| Black, %                          | 10.25         | 10.84         | 0.2218 | 10.68       | 11.71       | <0.001  |
| Hispanic, %                       | 4.57          | 5.33          | 0.1124 | 2.48        | 2.70        | NS      |
| Other, %                          | 4.00          | 4.59          | 0.0428 | 2.71        | 2.09        | <0.001  |
| Male gender, %                    | 53.95         | 54.35         | 0.0836 | 45.75       | 46.04       | NS      |
| End-stage renal disease, %        | 3.49          | 6.11          | <0.001 | 3.48        | 3.52        | NS      |
| <b>Discharge status</b>           |               |               |        |             |             |         |
| Home, %                           | 52.52         | 49.57         | <0.001 | NA          | NA          | NA      |
| Continued care, %                 | 36.78         | 39.78         | <0.001 | NA          | NA          | NA      |
| Hospice, %                        | 4.25          | 5.08          | <0.001 | NA          | NA          | NA      |
| Died, %                           | 6.46          | 5.57          | <0.001 | NA          | NA          | NA      |
| <b>Region</b>                     |               |               |        |             |             |         |
| Northeast, %                      | 16.88         | 21.17         | 0.1323 | 19.96       | 19.25       | 0.0045  |
| South, %                          | 34.86         | 39.44         | <0.001 | 26.26       | 25.45       | 0.0002  |
| Midwest, %                        | 18.85         | 23.25         | 0.0044 | 36.50       | 37.69       | 0.0007  |
| West, %                           | 7.23          | 8.31          | 0.0025 | 8.98        | 8.83        | NS      |
| California, %                     | 7.77          | 9.49          | <0.001 | 8.29        | 8.78        | <0.001  |

NA - not applicable

\* p-value indicates the significance of change over the study years; NS - not significant

**Table 2. Resource utilization and mortality outcomes for Medicare beneficiaries with CLD who sought inpatient care in 2005-2010.**

|                                                       | 2005            | 2006            | 2007                   | 2008            | 2009             | 2010            | p      |
|-------------------------------------------------------|-----------------|-----------------|------------------------|-----------------|------------------|-----------------|--------|
| <u>Length of stay, days</u>                           | 6.02 +/- 5.61   | 5.92 +/- 5.65   | 5.86 +/- 5.40          | 5.78 +/- 5.54   | 5.61 +/- 5.45    | 5.74 +/- 5.57   | 0.0001 |
| -- Mean (SD)                                          | 4 (3, 7)        | 4 (3, 7)        | 4 (3, 7)               | 4 (3, 7)        | 4 (2, 7)         | 4 (3, 7)        |        |
| -- Median(IQR)                                        |                 |                 |                        |                 |                  |                 |        |
| <u>Payment by patient, \$</u>                         | 650 +/- 782     | 649 +/- 695     | 650 +/- 762            | 661 +/- 796     | 661 +/- 802      | 626 +/- 758     | <.0001 |
| -- Mean +/- SD                                        |                 |                 |                        |                 |                  |                 |        |
| -- Median(IQR)                                        | 1,096 (0-1,096) | 1,100 (0-1,100) | 1,098 (0-1,098)        | 1,093 (0-1,093) | 1,104 (0-1,104)  | 1,100 (0-1,100) |        |
| <u>Payment by patient, %</u>                          | 7.70 +/- 9.20   | 7.64 +/- 8.77   | 8.54 +/- 12.67         | 8.84 +/- 13.33  | 8.18 +/- 10.16   | 7.66 +/- 9.48   | 0.0507 |
| -- Mean +/- SD                                        |                 |                 |                        |                 |                  |                 |        |
| -- Median(IQR)                                        | 7.66- (0-13.36) | 7.55- (0-13.38) | 7.32- (0-13.59)        | 7.38- (0-13.71) | 6.20- (0-13.80)  | 4.38- (0-12.75) |        |
| <u>Payment by Medicare, \$</u>                        | 10,542 +/-      | 10,435 +/-      | 9,817 +/- 11,768       | 10,159 +/-      | 9,956 +/- 12,547 | 10,765 +/-      | <.0001 |
| -- Mean +/- SD                                        | 14,023          | 13,085          |                        | 14,975          |                  | 13,779          |        |
| -- Median(IQR)                                        |                 |                 | 7,667<br>(6,268-9,638) |                 | 7,789 (          |                 |        |
|                                                       | 7,952           | 7,909           |                        | 7,743           | 4,996-10,572)    | 8,482           |        |
|                                                       | (6,581-9,962)   | (6,568-9,938)   |                        | (5,749-10,129)  |                  | (5,194-11,326)  |        |
| <u>Payment by Medicare, %</u>                         | 89.52 +/- 17.71 | 89.88 +/- 16.90 | 87.65 +/- 21.65        | 87.20 +/- 22.28 | 88.10 +/- 20.23  | 89.04 +/- 19.16 | 0.0011 |
| -- Mean +/- SD                                        |                 |                 |                        |                 |                  |                 |        |
| -- Median(IQR)                                        | 91.29           | 91.41           | 91.01                  | 91.18           | 92.29            | 93.75           |        |
|                                                       | (86.34-100.00)  | (86.26-100.00)  | (85.79-100.00)         | (85.10-100.00)  | (84.21-100.00)   | (85.12-100.00)  |        |
| <u>Total payment, \$ of 2010</u>                      | 11,769 +/-      | 11,623 +/-      | 11,652 +/-             | 11,711 +/-      | 11,916 +/-       | 12,347 +/-      | 0.0006 |
| -- Mean +/- SD                                        | 15,864          | 14,745          | 25,393                 | 18,912          | 16,045           | 17,641          |        |
| -- Median(IQR)                                        |                 |                 |                        |                 |                  |                 |        |
|                                                       | 8,596           | 8,522           | 8,382                  | 8,584           | 9,173            | 9,478           |        |
|                                                       | (7,485-10,748)  | (7,448-10,516)  | (7,187-10,486)         | (6,623-11,013)  | (5,985-11,779)   | (5,932-12,192)  |        |
| <u>In-hospital mortality rate, %</u>                  | 8.38            | 8.89            | 8.14                   | 8.71            | 9.86             | 11.81           | <.0001 |
| <u>Short-term pPost-discharge mortality rate, % *</u> | 36.37           | 34.21           | 34.12                  | 35.00           | 30.91            | 33.82           | 0.0099 |

\*Patients were followed up to March of the year following the hospitalization.

1  
2  
3  
4  
5  
6  
7  
8  
9  
10  
11  
12  
13  
14  
15  
16  
17  
18  
19  
20  
21  
22  
23  
24  
25  
26  
27  
28  
29  
30  
31  
32  
33  
34  
35  
36  
37  
38  
39  
40  
41  
42  
43  
44  
45  
46  
47  
48  
49  
50  
51  
52  
53  
54  
55  
56  
57  
58  
59  
60**Table 3.** Predictors of in-hospital mortality and overall post-discharge mortality in Medicare beneficiaries hospitalized for CLD in 2005-2010.\*

| Predictors                   | In-hospital Mortality | Post-discharge Mortality** |
|------------------------------|-----------------------|----------------------------|
|                              | OR (95% CI)           | OR (95% CI)                |
| <u>Age</u>                   |                       |                            |
| -- 65-69                     | Ref                   | Ref                        |
| -- <65                       | 0.83 (0.69, 0.99)     | 0.83 (0.72, 0.94)          |
| -- 70-74                     | 1.06 (0.85, 1.31)     | 1.16 (0.99, 1.35)          |
| -- 75-79                     | 1.28 (1.03, 1.60)     | 1.33 (1.13, 1.56)          |
| -- 80-84                     | 0.91 (0.71, 1.18)     | 1.23 (1.04, 1.46)          |
| -- 85 and over               | 0.92 (0.70, 1.21)     | 1.51 (1.27, 1.80)          |
| <u>Gender</u>                |                       |                            |
| -- Female                    | Ref                   | Ref                        |
| -- Male                      | 1.27 (1.11, 1.44)     | 1.34 (1.22, 1.46)          |
| <u>Race</u>                  |                       |                            |
| -- White                     | Ref                   | Ref                        |
| -- Black                     | 1.18 (0.96, 1.44)     | 0.81 (0.70, 0.95)          |
| -- Hispanic                  | 0.74 (0.52, 1.04)     | 0.91 (0.73, 1.13)          |
| -- Other                     | 1.11 (0.82, 1.51)     | 0.79 (0.63, 0.99)          |
| <u>ESRD</u>                  |                       |                            |
| -- No                        | Ref                   | Ref                        |
| -- Yes                       | 0.73 (0.55, 0.98)     | 1.14 (0.93, 1.40)          |
| <u>Number of admissions</u>  |                       |                            |
| -- 1                         | Ref                   | Ref                        |
| -- ≥2                        | 1.50 (1.31, 1.73)     | 1.62 (1.46, 1.80)          |
| <u>Discharge destination</u> |                       |                            |
| -- Home                      | N/A                   | Ref                        |
| -- Continued care            | N/A                   | 2.51 (2.29, 2.76)          |
| -- Hospice                   | N/A                   | 44.98 (33.01, 61.28)       |
| <u>Region</u>                |                       |                            |
| -- Northeast                 | Ref                   | Ref                        |
| -- South                     | 0.95 (0.81, 1.13)     | 1.27 (1.12, 1.43)          |
| -- Midwest                   | 0.79 (0.65, 0.96)     | 1.10 (0.96, 1.26)          |
| -- West                      | 0.84 (0.65, 1.10)     | 1.33 (1.11, 1.60)          |
| -- California                | 0.95 (0.74, 1.22)     | 1.23 (1.02, 1.47)          |
| Calendar Year                | 0.90 (0.87, 0.94)     | 1.00 (0.98, 1.03)          |
| Number of diagnosis          | 1.24 (1.17, 1.32)     | 1.06 (1.03, 1.09)          |
| Number of procedures         | 1.36 (1.31, 1.41)     | 0.98 (0.96, 1.01)          |
| Charlson score               | 1.01 (0.98, 1.05)     | 1.24 (1.21, 1.28)          |
| LOS                          | 1.01 (1.00, 1.02)     | 1.02 (1.01, 1.03)          |

\* Data in 2008 were excluded from analysis due to missing information on patient's residence region.

\*\* Patients were followed up to March of the year following the hospitalization

**Table 4.** Predictors of LOS, hospital charge and total payment of hospitalizations of Medicare beneficiaries for CLD in 2005-2010\*.

| Predictors                   | LOS Increase<br>% (95% CI) | Total Payment Increase<br>% (95% CI) |
|------------------------------|----------------------------|--------------------------------------|
| <b>Age</b>                   |                            |                                      |
| -- 65-69                     | Ref                        | Ref                                  |
| -- <65                       | -0.77 (-3.45, 1.90)        | -2.00 (-4.44, 0.43)                  |
| -- 70-74                     | -3.44 (-6.72, -0.16)       | -5.23 (-8.22, -2.24)                 |
| -- 75-79                     | -0.16 (-3.73, 3.41)        | -3.94 (-7.20, -0.69)                 |
| -- 80-84                     | 1.03 (-2.83, 4.89)         | -3.21 (-6.73, 0.31)                  |
| -- 85 and over               | -0.77 (-3.45, 1.90)        | -0.37(-4.16, 3.42)                   |
| <b>Gender</b>                |                            |                                      |
| -- Female                    | Ref                        | Ref                                  |
| -- Male                      | -4.63 (-6.53, -2.72)       | 1.11 (-0.63, 2.85)                   |
| <b>Race</b>                  |                            |                                      |
| -- White                     | Ref                        | Ref                                  |
| -- Black                     | 9.57 (6.42, 12.73)         | 4.82 (1.94, 7.70)                    |
| -- Hispanic                  | 11.36 (6.92, 5.80)         | 12.67 (8.62, 16.71)                  |
| -- Other                     | 1.90 (-2.76, 6.55)         | 1.58 (-2.66, 5.82)                   |
| <b>ESRD</b>                  |                            |                                      |
| -- No                        | Ref                        | Ref                                  |
| -- Yes                       | 2.23 (-2.19, 6.65)         | -5.86 (-9.90, -1.82)                 |
| <b>Discharge destination</b> |                            |                                      |
| -- Home                      | Ref                        | Ref                                  |
| -- Continued care            | 35.39 (33.31, 37.46)       | 0.53 (-1.39, 2.45)                   |
| -- Hospice                   | 37.42 (32.67, 42.17)       | -1.42 (-5.77, 2.94)                  |
| -- Died                      | 25.95 (21.96, 29.94)       | 8.07 (4.44, 1.69)                    |
| <b>Region</b>                |                            |                                      |
| -- Northeast                 | Ref                        | Ref                                  |
| -- South                     | -4.36 (-6.94, -1.79)       | -16.68 (-19.03, -14.33)              |
| -- Midwest                   | -12.18 (-15.08, -9.28)     | -23.40 (-26.05, -20.75)              |
| -- West                      | -13.82 (-17.71, -9.94)     | -12.59 (-16.12, -9.05)               |
| -- California                | -9.23 (-13.02, -5.44)      | 42.62 (39.16, 46.08)                 |
| <b>Calendar Year</b>         | -3.17 (-3.68, -2.66)       | 3.08 (2.61, 3.54)                    |
| <b>Number of diagnosis</b>   | 9.34 (8.70, 9.98)          | 3.72 (3.13, 4.30)                    |
| <b>Number of procedures</b>  | 17.70 (17.15, 18.25)       | 19.51 (18.95, 20.07)                 |
| <b>Charlson score</b>        | -1.36 (-1.96, -0.77)       | -0.47 (-1.01, 0.08)                  |
| <b>LOS</b>                   | N/A                        | 9.02 (8.80, 9.24)                    |

\* Data in 2008 were excluded from multivariate analysis due to missing information on region.

**Table 5.** Resource utilization for Medicare beneficiaries with CLD who sought outpatient care in 2005-2010 (median (IQR)).

|                                                     | 2005                   | 2006                   | 2007                   | 2008                   | 2009                   | 2010                   | p       |
|-----------------------------------------------------|------------------------|------------------------|------------------------|------------------------|------------------------|------------------------|---------|
| Yearly number of claims per patient (mean $\pm$ SD) | 2.10 +/- 2.92          | 2.11 +/- 2.94          | 2.11 +/- 2.94          | 2.12 +/- 3.02          | 2.12 +/- 2.91          | 2.12 +/- 2.85          | <0.0001 |
| Total yearly payment, \$                            | 366.2<br>(111.9-888.1) | 387.5<br>(113.8-901.6) | 397.1<br>(114.7-903.0) | 386.2<br>(113.3-924.3) | 408.8<br>(117.8-940.8) | 404.0<br>(119.5-929.7) | <.0001  |
| Yearly payment by patient, \$                       | 104.8<br>(10.9-307.7)  | 108.1<br>(13.0-277.3)  | 111.2<br>(15.5-271.7)  | 104.0<br>(16.0-256.2)  | 98.9<br>(20.3-204.4)   | 95.5<br>(22.0-202.2)   | <.0001  |
| Yearly payment by patient, %                        | 25.4<br>(3.7-44.2)     | 24.5<br>(7.0-38.4)     | 24.8<br>(9.5-38.3)     | 22.8<br>(8.9-36.2)     | 20.0<br>(10.5-27.5)    | 20.0<br>(11.6-27.4)    | <.0001  |
| Yearly payment by Medicare, \$                      | 237.1<br>(78.4-554.9)  | 260.7<br>(83.6-592.7)  | 266.9<br>(85.6-604.0)  | 263.9<br>(83.8-629.4)  | 299.5<br>(89.4-695.0)  | 300.0<br>(90.6-684.7)  | <.0001  |
| Yearly payment by Medicare, %                       | 73.1<br>(55.0-92.7)    | 74.2<br>(61.1-90.2)    | 74.1<br>(61.4-88.2)    | 75.9<br>(63.8-88.4)    | 80.0<br>(70.4-87.3)    | 80.0<br>(70.7-86.6)    | <.0001  |

**Table 6.** Independent predictors of outpatient spending for Medicare beneficiaries with CLD.

| <u>Predictors</u>                                         | <u>Payment increase, % (95% CI) †</u> |
|-----------------------------------------------------------|---------------------------------------|
| <u>Calendar year</u>                                      | <u>-1.66 (-1.98 - -1.34)</u>          |
| <u>Age &lt;65</u>                                         | <u>+50.24 (+46.30 - +54.27)</u>       |
| <u>Age 65-69</u>                                          | <u>+33.89 (+30.27 - +37.62)</u>       |
| <u>Age 70-74</u>                                          | <u>+29.15 (+25.57 - +32.83)</u>       |
| <u>Age 75-79</u>                                          | <u>+22.80 (+19.29 - +26.41)</u>       |
| <u>Age 80-84</u>                                          | <u>+13.86 (+10.39 - +17.44)</u>       |
| <u>Age 85+</u>                                            | <u>Reference</u>                      |
| <u>Male</u>                                               | <u>+3.75 (+2.48 - +5.04)</u>          |
| <u>Caucasian</u>                                          | <u>Reference</u>                      |
| <u>Black</u>                                              | <u>-5.21 (-7.10 - -3.29)</u>          |
| <u>Hispanic</u>                                           | <u>+8.74 (+4.55 - +13.10)</u>         |
| <u>Asian</u>                                              | <u>+12.22 (+7.19 - +17.49)</u>        |
| <u>ESRD</u>                                               | <u>+120.67 (+113.32 - +128.27)</u>    |
| <u>Location: Northeast</u>                                | <u>Reference</u>                      |
| <u>Location: Midwest</u>                                  | <u>+8.56 (+6.60 - +10.56)</u>         |
| <u>Location: South</u>                                    | <u>+6.18 (+4.38 - +8.00)</u>          |
| <u>Location: West</u>                                     | <u>+20.99 (+18.04 - +24.01)</u>       |
| <u>Location: California</u>                               | <u>+9.07 (+6.34 - +11.86)</u>         |
| <u>The number of diagnoses per claim, per dx</u>          | <u>+25.45 (+25.11 - +25.80)</u>       |
| <u>The number of outpatient procedures, per procedure</u> | <u>+31.04 (+26.60 - +35.64)</u>       |

† The increase is in comparison to the reference value. A negative increase represents a decrease.

Supplementary Table 1. Clinical characteristics of hospitalizations of Medicare beneficiaries for liver disease by discharge year

| Characteristics                    | 2005             | 2006             | 2007             | 2008             | 2009             | 2010             | P-value |
|------------------------------------|------------------|------------------|------------------|------------------|------------------|------------------|---------|
| No. of patients                    | 2,582            | 2,444            | 2,560            | 2,482            | 2,451            | 2,458            |         |
| No. of hospitalizations            | 3,698            | 3,494            | 3,677            | 3,475            | 3,552            | 3,680            |         |
| Age                                |                  |                  |                  |                  |                  |                  |         |
| <65                                | 38.18            | 38.44            | 41.39            | 39.48            | 40.65            | 42.47            | <.0001  |
| 65-69                              | 15.87            | 16.49            | 18.14            | 17.38            | 19.14            | 19.62            | <.0001  |
| 70-74                              | 16.01            | 16.20            | 13.82            | 14.73            | 15.34            | 12.64            | <.0001  |
| 75-79                              | 13.28            | 12.68            | 11.15            | 12.52            | 9.66             | 8.89             | <.0001  |
| 80-84                              | 9.19             | 9.27             | 9.03             | 8.03             | 8.14             | 8.40             | 0.0166  |
| 85 and over                        | 7.46             | 6.93             | 6.47             | 7.86             | 7.07             | 7.99             | 0.1107  |
| Race                               |                  |                  |                  |                  |                  |                  |         |
| White                              | 81.18            | 81.37            | 79.93            | 79.88            | 80.69            | 79.24            | 0.0162  |
| Black                              | 10.25            | 9.50             | 10.44            | 10.50            | 9.57             | 10.84            | 0.2218  |
| Hispanic                           | 4.57             | 4.95             | 5.25             | 5.09             | 4.95             | 5.33             | 0.1124  |
| Other                              | 4.00             | 4.18             | 4.38             | 4.52             | 4.79             | 4.59             | 0.0428  |
| Male gender                        | 53.95            | 56.01            | 54.31            | 46.99            | 54.42            | 54.35            | 0.0836  |
| ESRD                               | 3.49             | 4.06             | 5.41             | 6.91             | 6.64             | 6.11             | <.0001  |
| Discharge status                   |                  |                  |                  |                  |                  |                  |         |
| Home                               | 53.57            | 55.58            | 53.85            | 51.77            | 50.82            | 49.57            | <.0001  |
| Continued care                     | 35.02            | 33.92            | 35.68            | 38.10            | 38.18            | 39.78            | <.0001  |
| Hospice                            | 3.16             | 3.61             | 4.41             | 4.32             | 4.90             | 5.08             | <.0001  |
| Died                               | 8.25             | 6.90             | 6.06             | 5.81             | 6.11             | 5.57             | <.0001  |
| Region                             |                  |                  |                  |                  |                  |                  |         |
| Northeast                          | 19.36            | 19.23            | 18.33            | N/A              | 18.89            | 21.17            | 0.1323  |
| Midwest                            | 22.47            | 22.55            | 21.16            | N/A              | 23.25            | 20.05            | <.0001  |
| West                               | 8.49             | 7.90             | 9.19             | N/A              | 8.31             | 7.91             | 0.0044  |
| California                         | 7.57             | 8.56             | 8.76             | N/A              | 9.49             | 10.46            | 0.0025  |
| South                              | 40.72            | 40.84            | 41.56            | N/A              | 39.44            | 40.05            | <.0001  |
| Number of diagnoses<br>Mean +/-SD  | 7.92 +/-<br>1.73 | 7.98 +/-<br>1.70 | 8.27 +/-<br>1.46 | 8.34 +/-<br>1.45 | 8.49 +/-<br>1.38 | 8.64 +/-<br>1.31 | <.0001  |
| Number of procedures<br>Mean +/-SD | 1.59 +/-<br>1.75 | 1.61 +/-<br>1.74 | 1.62 +/-<br>1.76 | 1.61 +/-<br>1.75 | 1.58 +/-<br>1.78 | 1.67 +/-<br>1.79 | 0.2554  |
| Charlson Score<br>Mean +/-SD       | 1.31 +/-<br>1.58 | 1.35 +/-<br>1.63 | 1.47 +/-<br>1.72 | 1.26 +/-<br>1.57 | 1.33 +/-<br>1.63 | 1.36 +/-<br>1.67 | <.0001  |

Supplementary Table 2. Clinical characteristics of hospitalizations of Medicare beneficiaries for liver disease by discharge year

| Characteristics                                 | 2005        | 2006        | 2007        | 2008        | 2009        | 2010        | P-value |
|-------------------------------------------------|-------------|-------------|-------------|-------------|-------------|-------------|---------|
| No. of patients                                 | 39885       | 39605       | 39693       | 38485       | 41982       | 44546       |         |
| No. of claims                                   | 83866       | 83422       | 83728       | 81735       | 88930       | 94309       |         |
| CLD as a primary DX, %                          | 46.94       | 45.78       | 43.93       | 41.51       | 39.63       | 38.15       | <.0001  |
| Age                                             |             |             |             |             |             |             |         |
| <65                                             | 30.48       | 30.61       | 31.67       | 33.22       | 33.43       | 34.33       | <.0001  |
| 65-69                                           | 20.65       | 20.54       | 20.69       | 20.6        | 21.08       | 21.46       | 0.0055  |
| 70-74                                           | 17.66       | 17.36       | 17.11       | 17.03       | 17.22       | 16.52       | 0.0006  |
| 75-79                                           | 15.03       | 14.72       | 14.28       | 13.19       | 12.71       | 12.35       | <.0001  |
| 80-84                                           | 9.7         | 10.23       | 9.76        | 9.47        | 9.06        | 8.88        | <.0001  |
| 85 and over                                     | 6.49        | 6.53        | 6.49        | 6.5         | 6.5         | 6.47        | 0.9995  |
| Race                                            |             |             |             |             |             |             |         |
| White                                           | 81.85       | 81.94       | 81.67       | 77.76       | 80.84       | 80.58       | <.0001  |
| Black                                           | 10.68       | 10.56       | 10.94       | 13.41       | 11.45       | 11.71       | <.0001  |
| Hispanic                                        | 2.48        | 2.56        | 2.43        | 2.78        | 2.6         | 2.7         | 0.1731  |
| Other                                           | 2.71        | 2.54        | 2.43        | 2.37        | 2.23        | 2.09        | <.0001  |
| Male gender                                     | 45.75       | 45.89       | 45.84       | 46.49       | 45.83       | 46.04       | 0.3652  |
| ESRD                                            | 3.48        | 3.55        | 3.71        | 3.56        | 3.51        | 3.52        | 0.5772  |
| Region                                          |             |             |             |             |             |             |         |
| Northeast                                       | 19.96       | 20.05       | 20.16       | 18.97       | 19.51       | 19.25       | 0.0045  |
| Midwest                                         | 26.26       | 26.4        | 25.66       | 23.58       | 25.5        | 25.45       | 0.0002  |
| South                                           | 36.5        | 36.61       | 36.7        | 37.59       | 37.44       | 37.69       | 0.0007  |
| West                                            | 8.98        | 8.63        | 9.01        | 9.18        | 8.87        | 8.83        | 0.4301  |
| California                                      | 8.29        | 8.31        | 8.47        | 10.68       | 8.68        | 8.78        | <.0001  |
| Mean number of diagnoses per claim, Mean +/-SD  | 3.55 ± 2.11 | 3.69 ± 2.15 | 3.8 ± 2.22  | 3.95 ± 2.27 | 4.15 ± 2.33 | 4.32 ± 2.39 | <.0001  |
| Total number of procedures per year, Mean +/-SD | 0.01 ± 0.16 | 0.01 ± 0.17 | 0.01 ± 0.20 | 0.01 ± 0.17 | 0.01 ± 0.18 | 0.01 ± 0.18 | 0.9532  |
| Mean Charlson Score per claim, Mean +/-SD       | 1.25 ± 1.46 | 1.30 ± 1.48 | 1.35 ± 1.50 | 1.39 ± 1.48 | 1.41 ± 1.51 | 1.43 ± 1.50 | <.0001  |



STROBE 2007 (v4) Statement—Checklist of items that should be included in reports of cohort studies

| Section/Topic             | Item # | Recommendation                                                                                                                                                                       | Reported on page # |
|---------------------------|--------|--------------------------------------------------------------------------------------------------------------------------------------------------------------------------------------|--------------------|
| Title and abstract        | 1      | (a) Indicate the study’s design with a commonly used term in the title or the abstract                                                                                               | 1-2                |
|                           |        | (b) Provide in the abstract an informative and balanced summary of what was done and what was found                                                                                  | 2                  |
| <b>Introduction</b>       |        |                                                                                                                                                                                      |                    |
| Background/rationale      | 2      | Explain the scientific background and rationale for the investigation being reported                                                                                                 | 3-4                |
| Objectives                | 3      | State specific objectives, including any prespecified hypotheses                                                                                                                     | 4                  |
| <b>Methods</b>            |        |                                                                                                                                                                                      |                    |
| Study design              | 4      | Present key elements of study design early in the paper                                                                                                                              | 4                  |
| Setting                   | 5      | Describe the setting, locations, and relevant dates, including periods of recruitment, exposure, follow-up, and data collection                                                      | 4-7                |
| Participants              | 6      | (a) Give the eligibility criteria, and the sources and methods of selection of participants. Describe methods of follow-up                                                           | 5-7                |
|                           |        | (b) For matched studies, give matching criteria and number of exposed and unexposed                                                                                                  | N/A                |
| Variables                 | 7      | Clearly define all outcomes, exposures, predictors, potential confounders, and effect modifiers. Give diagnostic criteria, if applicable                                             | 5-8                |
| Data sources/ measurement | 8*     | For each variable of interest, give sources of data and details of methods of assessment (measurement). Describe comparability of assessment methods if there is more than one group | 5-8                |
| Bias                      | 9      | Describe any efforts to address potential sources of bias                                                                                                                            | 8-9                |
| Study size                | 10     | Explain how the study size was arrived at                                                                                                                                            | 5-7                |
| Quantitative variables    | 11     | Explain how quantitative variables were handled in the analyses. If applicable, describe which groupings were chosen and why                                                         | 6-8                |
| Statistical methods       | 12     | (a) Describe all statistical methods, including those used to control for confounding                                                                                                | 8-9                |
|                           |        | (b) Describe any methods used to examine subgroups and interactions                                                                                                                  | 8-9                |
|                           |        | (c) Explain how missing data were addressed                                                                                                                                          | 7                  |
|                           |        | (d) If applicable, explain how loss to follow-up was addressed                                                                                                                       | N/A                |
|                           |        | (e) Describe any sensitivity analyses                                                                                                                                                | N/A                |
| <b>Results</b>            |        |                                                                                                                                                                                      |                    |

|                          |     |                                                                                                                                                                                                              |       |
|--------------------------|-----|--------------------------------------------------------------------------------------------------------------------------------------------------------------------------------------------------------------|-------|
| Participants             | 13* | (a) Report numbers of individuals at each stage of study—eg numbers potentially eligible, examined for eligibility, confirmed eligible, included in the study, completing follow-up, and analysed            | 9-11  |
|                          |     | (b) Give reasons for non-participation at each stage                                                                                                                                                         | N/A   |
|                          |     | (c) Consider use of a flow diagram                                                                                                                                                                           | N/A   |
| Descriptive data         | 14* | (a) Give characteristics of study participants (eg demographic, clinical, social) and information on exposures and potential confounders                                                                     | 9-11  |
|                          |     | (b) Indicate number of participants with missing data for each variable of interest                                                                                                                          | N/A   |
|                          |     | (c) Summarise follow-up time (eg, average and total amount)                                                                                                                                                  | N/A   |
| Outcome data             | 15* | Report numbers of outcome events or summary measures over time                                                                                                                                               | 9-12  |
| Main results             | 16  | (a) Give unadjusted estimates and, if applicable, confounder-adjusted estimates and their precision (eg, 95% confidence interval). Make clear which confounders were adjusted for and why they were included | 9-12  |
|                          |     | (b) Report category boundaries when continuous variables were categorized                                                                                                                                    | 9-12  |
|                          |     | (c) If relevant, consider translating estimates of relative risk into absolute risk for a meaningful time period                                                                                             | N/A   |
| Other analyses           | 17  | Report other analyses done—eg analyses of subgroups and interactions, and sensitivity analyses                                                                                                               | N/A   |
| <b>Discussion</b>        |     |                                                                                                                                                                                                              |       |
| Key results              | 18  | Summarise key results with reference to study objectives                                                                                                                                                     | 9-12  |
| <b>Limitations</b>       |     |                                                                                                                                                                                                              |       |
| Interpretation           | 20  | Give a cautious overall interpretation of results considering objectives, limitations, multiplicity of analyses, results from similar studies, and other relevant evidence                                   | 12-16 |
| Generalisability         | 21  | Discuss the generalisability (external validity) of the study results                                                                                                                                        | 14-15 |
| <b>Other information</b> |     |                                                                                                                                                                                                              |       |
| Funding                  | 22  | Give the source of funding and the role of the funders for the present study and, if applicable, for the original study on which the present article is based                                                | N/A   |

\*Give information separately for cases and controls in case-control studies and, if applicable, for exposed and unexposed groups in cohort and cross-sectional studies.

**Note:** An Explanation and Elaboration article discusses each checklist item and gives methodological background and published examples of transparent reporting. The STROBE checklist is best used in conjunction with this article (freely available on the Web sites of PLoS Medicine at <http://www.plosmedicine.org/>, Annals of Internal Medicine at <http://www.annals.org/>, and Epidemiology at <http://www.epidem.com/>). Information on the STROBE Initiative is available at [www.strobe-statement.org](http://www.strobe-statement.org).
